# Supplementary material
Source: publisher figshare collection journal article supplement (https://acs.figshare.com/ndownloader/files/12354752)

## Supporting Information

### Copper-catalyzed Difunctionalization of Allenes with Sulfonyl Iodides Leading to (*E*)- $\alpha$ -Iodomethyl Vinylsulfones

Ning Lu<sup>a</sup>, Zhiguo Zhang,<sup>\*a</sup> Guisheng Zhang,<sup>\*a</sup> Nana Ma, Conghui Wu<sup>a</sup>, Qingfeng Liu<sup>a</sup>, Tongxin Liu<sup>a</sup>

<sup>a</sup> Collaborative Innovation Center of Henan Province for Green Manufacturing of Fine Chemicals, Key Laboratory of Green Chemical Media and Reactions, Ministry of Education, Henan Key Laboratory of Organic Functional Molecule and Drug Innovation, School of Chemistry and Chemical Engineering, Henan Normal University, Xinxiang, Henan, 453007, China. Fax: (+86)-373-332-5250; E-mail: [zgs6668@yahoo.com](mailto:zgs6668@yahoo.com) or [zhangzg@htu.edu.cn](mailto:zhangzg@htu.edu.cn)

#### Table of Contents

|                                                                     |     |
|---------------------------------------------------------------------|-----|
| I. General Remarks.....                                             | S2  |
| II. Screening Reaction Conditions.....                              | S3  |
| III. Typical Experimental Procedure.....                            | S5  |
| IV. X-ray Single Crystal Diffraction Data.....                      | S10 |
| V. Analytical Data.....                                             | S14 |
| VI. References.....                                                 | S23 |
| VII. <sup>1</sup> H NMR and <sup>13</sup> C NMR Spectra Copies..... | S24 |

## I. General Remarks:

All reactions were carried out at 25 °C, unless otherwise indicated. All other reagents were purchased from commercial sources and used without further treatment, unless otherwise indicated. Petroleum ether (PE) used here refers to the 60-90 °C boiling point fraction of petroleum. Ethyl acetate is abbreviated as EA. <sup>1</sup>H NMR and <sup>13</sup>C NMR spectra were recorded on Bruker Avance/600 (<sup>1</sup>H: 600 MHz, <sup>13</sup>C: 150 MHz at 25 °C) or Bruker Avance/400 (<sup>1</sup>H: 400 MHz, <sup>13</sup>C: 100 MHz at 25 °C) and tetramethylsilane as the internal standard. Data are represented as follows: chemical shift, integration, multiplicity (br = broad, s = singlet, d = doublet, dd = double doublet, t = triplet, q = quartet, and m = multiplet), and coupling constants in Hertz (Hz). All high-resolution mass spectra (HRMS) were measured on a mass spectrometer by using electrospray ionization orthogonal acceleration time-of-flight (ESI-oe-TOF), and the purity of all samples used for HRMS (>95%) was confirmed by <sup>1</sup>H NMR and <sup>13</sup>C NMR spectroscopic analysis. Melting points were measured on a melting point apparatus equipped with a thermometer and were uncorrected. All reactions were monitored by thin-layer chromatography (TLC) with GF254 silica gel-coated plates, and in general, it was designated as the end of the reaction when the starting material **2** was consumed. Flash chromatography was carried out on SiO<sub>2</sub> (silica gel 60–100 mesh).

## II. Screening reaction conditions.

Propa-1,2-dienylbenzene (**1a**) and *p*-toluenesulfonyl iodide (**2a**) was selected as a model substrate to explore the optimal conditions for this reaction. The key experiments are summarized in Table S1. In the beginning, 48% of product (*E*)-1-((3-iodo-1-phenylprop-1-en-2-yl)sulfonyl)-4-methylbenzene (**3a**) were isolated when we treated the mixture of **1a** and **2a** with 0.2 equiv of CuI and 0.5 equiv of 1,10-phen in dichloromethane (DCM) solvent at 25 °C for 0.5 h (Table S1, entry 1). Next, 0.4 equiv of CuI was employed to the reaction, to our delight, the desired product **3a** was obtained in 70% yield, without the isolation of other isomers (Table S1, entry 2). However, increasing the amount of CuI to 0.6 equiv could not further enhance the yield of **3a** (Table S1, entry 3). The conversion proceeds not well if the reaction was performed in the absence of CuI (Table S1, entry 4).<sup>[1]</sup> Furthermore, decreasing the amount of 1,10-phen resulted in a lower yield of **3a** (Table S1, entries 5-8). Other monovalent copper salt including CuCl and CuBr gave a lower yield of **3a** (54 and 53%, respectively) than that of CuBr (Table S1, entries 9 and 10). On the other hand, lower product yields were also observed on repeating the reaction with 2,2'-bipyridine (BIPY) or pyridine additive (Table S1, entries 11 and 12). The reaction was also screened to several solvents, including MeOH, MeCN, DMSO, DMF, Et<sub>2</sub>O, 1,4-dioxane and toluene. However, all of them were found to be much less efficient than DCM (Table S1, entries 13-19). It is noteworthy that this reaction was found to be amenable to gram-scale synthesis, as exemplified by the reaction of **1a** (0.87 g, 7.5 mmol) with **2a** (1.41 g, 5.0 mmol), which afforded **3a** in 53% yield (1.05 g, 2.6 mmol).

**Table S1.** Survey of the Reaction Conditions.<sup>a</sup>

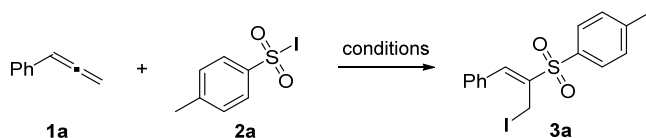

| Entry | CuI (equiv) | Additive (equiv) | Solvent | Time/h | Yield of <b>3a</b> /% |
|-------|-------------|------------------|---------|--------|-----------------------|
| 1     | CuI (0.2)   | 1,10-phen (0.5)  | DCM     | 0.5    | 48                    |
| 2     | CuI (0.4)   | 1,10-phen (0.5)  | DCM     | 20 min | 70                    |

|    |            |                 |                   |        |                 |
|----|------------|-----------------|-------------------|--------|-----------------|
| 3  | CuI (0.6)  | 1,10-phen (0.5) | DCM               | 15 min | 66              |
| 4  | CuI (0)    | 1,10-phen (0.5) | DCM               | 1      | 31              |
| 5  | CuI (0.4)  | 1,10-phen (0)   | DCM               | 1      | 39              |
| 6  | CuI (0)    | 1,10-phen (0)   | DCM               | 1      | trace           |
| 7  | CuI (0.4)  | 1,10-phen (0.2) | DCM               | 1      | 58              |
| 8  | CuI (0.4)  | 1,10-phen (0.4) | DCM               | 0.5    | 57              |
| 9  | CuCl (0.4) | 1,10-phen (0.5) | DCM               | 1      | 54              |
| 10 | CuBr (0.4) | 1,10-phen (0.5) | DCM               | 1      | 53              |
| 11 | CuI (0.4)  | BIPY (0.5)      | DCM               | 1      | 51              |
| 12 | CuI (0.4)  | Pyridine (0.5)  | DCM               | 1      | 26              |
| 13 | CuI (0.4)  | 1,10-phen (0.5) | MeOH              | 0.5    | 46              |
| 14 | CuI (0.4)  | 1,10-phen (0.5) | MeCN              | 1      | 46              |
| 15 | CuI (0.4)  | 1,10-phen (0.5) | DMSO              | 1      | 11              |
| 16 | CuI (0.4)  | 1,10-phen (0.5) | DMF               | 1      | 35              |
| 17 | CuI (0.4)  | 1,10-phen (0.5) | Et <sub>2</sub> O | 1      | 33              |
| 18 | CuI (0.4)  | 1,10-phen (0.5) | 1,4-dioxane       | 1      | 66              |
| 19 | CuI (0.4)  | 1,10-phen (0.5) | toluene           | 1      | 42 <sup>b</sup> |

<sup>a</sup> Unless otherwise indicated, all reactions were carried with **1a** (0.45 mmol), **2a** (0.3 mmol), CuI, and 1,10-phen in solvent in 1 mL at 25 °C. <sup>b</sup> Reaction was performed at 80 °C.

In order to clarify the X<sup>-</sup> donors, we carried out several control experiments. We found the reaction of **1a** and **2b** afforded a mixture of **3a** and **3ad** in 22% and 25% yield, respectively. These observations indicated that the X<sup>-</sup> in the product **3** might come from CuX and sulfonyl halides (eq S1).

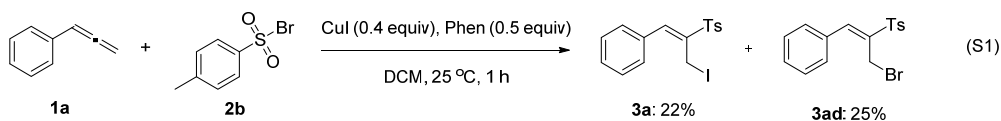

### III. Typical Experimental Procedure

For **1** (**1a** as an example):<sup>[2]</sup>

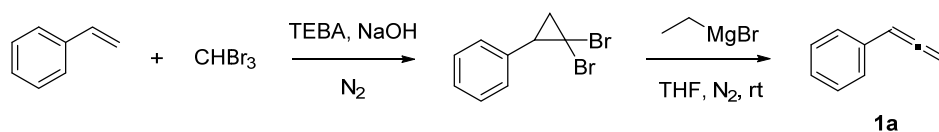

**Step 1.** Styrene (5.2 g, 50 mmol),  $\text{CHBr}_3$  (19 g, 75 mmol) and triethylbenzylammonium chloride (125 mg, 0.5 mmol) were added to a 100 mL round-bottom flask under nitrogen atmosphere. A solution of sodium hydroxide (8 g in 8 mL of  $\text{H}_2\text{O}$ ) was added dropwise to the mixture (The reaction mixture was kept below  $50\text{ }^\circ\text{C}$ ). After all the sodium hydroxide had been added, the reaction mixture was stirred for an additional 2 hours at  $60\text{ }^\circ\text{C}$ . The resulting mixture was diluted by 50 mL of water and extracted with dichloromethane ( $50\text{ mL} \times 3$ ). The combined organic layer was washed with brine, and dried with anhydrous  $\text{Na}_2\text{SO}_4$ . After filtration and concentration, the crude product was purified by a short flash silica gel column chromatography (eluent: PE) to give (2,2-dibromocyclopropyl)benzene as a yellow oil (10.7 g, 78%).

**Step 2.**  $\text{EtMgBr}$  (2.0 M in THF, 1.5 equiv, 8 mL) was added dropwise to a solution of (2,2-dibromocyclopropyl)benzene (2.8 g, 10 mmol) in dry THF (20 mL) under nitrogen atmosphere at room temperature. The resulting mixture was allowed to stir at room temperature for an additional 30 minutes. Then the reaction was quenched by saturated  $\text{NH}_4\text{Cl}$  solution (25 mL), and extracted with petroleum ether ( $25\text{ mL} \times 3$ ). The combined organic layers was washed with brine ( $25\text{ mL} \times 3$ ), and dried with anhydrous  $\text{Na}_2\text{SO}_4$ . After filtration and concentration, the crude product was purified by a short flash silica gel column chromatography (eluent: PE) to give propa-1,2-dien-1-ylbenzene **1a** as a yellow oil (1.1 g, 93%).

For **2-(propa-1,2-dien-1-yl)pyridine**:<sup>[3]</sup>

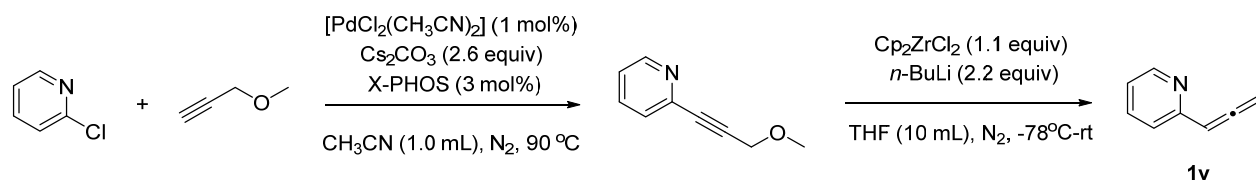

**Step 1.** An oven dried schlenk tube was evacuated and backfilled with nitrogen (the cycle was performed twice) and then charged under a positive pressure of nitrogen with  $[\text{PdCl}_2(\text{CH}_3\text{CN})_2]$  (12 mg, 0.5  $\mu\text{mol}$ ), X-PHOS (66 mg, 0.14 mol),  $\text{Cs}_2\text{CO}_3$  (3.91 g, 12 mmol), followed by anhydrous acetonitrile (10 mL) and the aryl chloride (4.62 mmol). The slightly yellow suspension was stirred for 25 min. Then the alkyne (6 mmol) was injected, the schlenk tube was sealed with a teflon valve, and the reaction mixture was stirred at the desired temperature for the indicated period of time. The resulting suspension was allowed to reach room temperature, diluted with water (3 mL), and extracted with diethyl ether ( $4 \times 4$  mL). The combined organic layers were dried over  $\text{MgSO}_4$ . After filtration and concentration, the crude product was purified by a short flash silica gel column chromatography (eluent: EA/PE = 1/10) to give 2-(3-methoxyprop-1-yn-1-yl)pyridine as a brown oil (0.6 g, 82%).

**Step 2.** To a solution of  $\text{Cp}_2\text{ZrCl}_2$  (0.94 g, 3.2 mmol) in THF (10 mL) was added dropwise of *n*-BuLi (6.4 mmol, 4.4 mL, 1.6 M solution in hexane) under nitrogen atmosphere at  $-78^\circ\text{C}$ . After stirring for 1 h at the same temperature,  $\gamma$ -(2-pyridyl)propargyl methyl ether (2 mmol) was added and the reaction mixture was warmed up to room temperature and stirred for 3 h. The reaction was quenched with saturated  $\text{NaHCO}_3$  solution and extracted with EA. The extract was washed with water, brine, and dried over anhydrous  $\text{Na}_2\text{SO}_4$ . After filtration and concentration, the crude product was purified by a short flash silica gel column chromatography (eluent: EA/PE = 1/10) to give 2-(propa-1,2-dien-1-yl)pyridine as a yellow oil (0.08 g, 39%).

For *N*-phenyl-*N*-(propa-1,2-dien-1-yl)acetamide:<sup>[4]</sup>

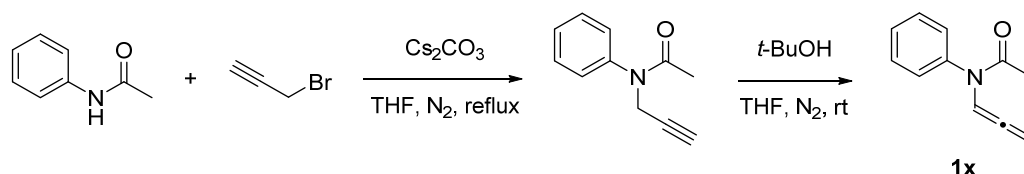

**Step 1.** To a schlenk tube (100 mL) were added *N*-phenylacetamide (1.4 g, 10 mmol), propargyl bromide (0.9 mL, 12 mmol), Cs<sub>2</sub>CO<sub>3</sub> (4.9 g, 15 mmol) and anhydrous THF (10 mL) under nitrogen atmosphere and reflux overnight (the whole process was closely monitored by TLC). After the completion of the reaction, the reaction was quenched by water (20 mL), the mixture was extracted with dichloromethane (3 × 10 mL). The combined organic layers were dried over Na<sub>2</sub>SO<sub>4</sub>. After filtration and concentration, the crude product was purified by a short flash silica gel column chromatography (eluent: EA/PE = 1/10) to give *N*-phenyl-*N*-(prop-2-yn-1-yl)acetamide as a yellow solid (1.0 g, 58%).

**Step 2.** To a schlenk tube (50 mL) were added *N*-phenyl-*N*-(prop-2-yn-1-yl)acetamide (5 mmol), *t*-BuOK (0.17 g, 1.5 mmol) and anhydrous THF (3 mL) at room temperature (the whole process was closely monitored by TLC). After the completion of the reaction, the reaction was quenched by water (20 mL), the mixture was extracted with dichloromethane (3 × 10 mL). The combined organic layers were dried over Na<sub>2</sub>SO<sub>4</sub>. After filtration and concentration, the crude product was purified by a short flash silica gel column chromatography (eluent: EA/PE = 1/10) to give *N*-phenyl-*N*-(propa-1,2-dien-1-yl)acetamide as a yellow solid (0.6 g, 74%).

For **2** (**2a** as an example):<sup>[5]</sup>

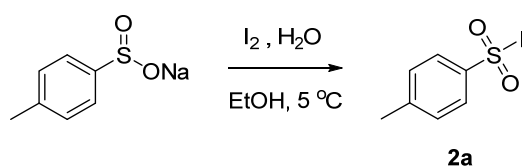

To a round-bottom flask (100 mL) was added sodium *p*-tolylsulfinate (2.5g, 14 mmol), dissolved in 50 mL of distilled water at room temperature. A saturated solution of iodine (2.1 g, 11.2 mmol) in alcohol (10 mL) was prepared and added gradually to the sodium *p*-tolylsulfinate solution until a slight excess of iodine was present. During this period, the yellow precipitate was formed gradually. The precipitate was filtered, washed with cold water, and dried carefully at room temperature to give *p*-toluenesulfonyl iodide **2a** as a yellow solid (3.6 g, 91%).

For **4-methylbenzenesulfonyl bromide**:<sup>[6]</sup>

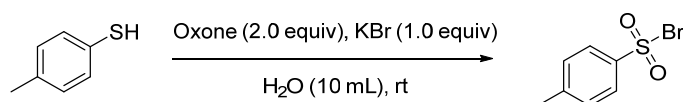

To a round-bottom flask (50 mL) was added 4-methylbenzenethiol (3.4 mmol), oxone (8.6 mmol), KBr (3.4 mmol), and water (10 mL) at room temperature (the whole process was closely monitored by TLC). After the completion of the reaction, the reaction mixture was extracted with ethyl acetate (4 × 5 mL). The combined organic layers were dried over Na<sub>2</sub>SO<sub>4</sub>. After filtration and concentration, the crude product was purified by a short flash silica gel column chromatography (eluent: PE) to give 4-methylbenzenesulfonyl bromide as a yellow solid (0.4 g, 50%)

For **3** (**3a** as an example):

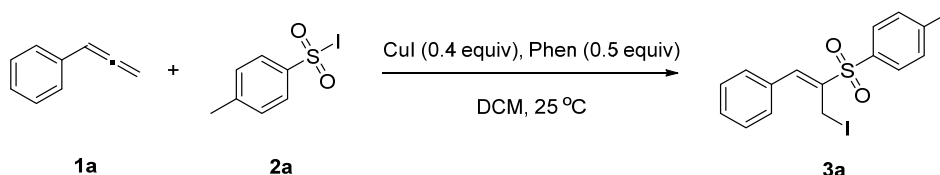

To a round-bottom flask (25 mL) were added propa-1,2-dienylbenzene **1a** (52 mg, 0.45 mmol), *p*-toluenesulfonyl iodide **2a** (85 mg, 0.3 mmol), CuI (23 mg, 0.12 mmol), Phen (27 mg, 0.15 mmol), the mixture was well stirred for 20 min in DCM (1.0 mL) at 25 °C (the whole process was closely monitored by TLC). After the completion of the reaction, the residue was purified by a short flash silica gel column chromatography (eluent: EA/PE = 1/50) to give (*E*)-1-((3-iodo-1-phenylprop-1-en-2-yl)sulfonyl)-4-methylbenzene **3a** as light yellow solid (84 mg, 70%) and the recovery of **1a** was 23%.

For synthetic method example, at 5 mmol scale:

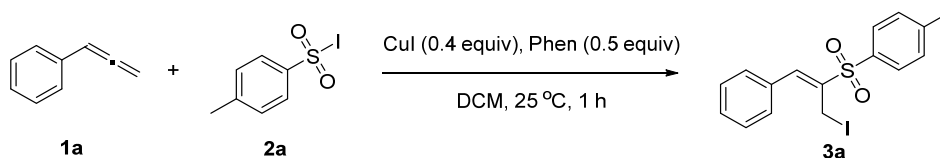

To a round-bottom flask (50 mL) were added propa-1,2-dienylbenzene **1a** (0.87 g, 7.5 mmol), *p*-toluenesulfonyl iodide **2a** (1.41 g, 5.0 mmol), CuI (0.38 g, 2.0 mmol), Phen (0.45 g, 2.5 mmol), the mixture was well stirred for 1 h in DCM (5.0 mL) at 25 °C (the whole process was closely monitored



by TLC). After the completion of the reaction, the residue was purified by a short flash silica gel column chromatography (eluent: EA/PE = 1/50) to give (*E*)-1-((3-iodo-1-phenylprop-1-en-2-yl)sulfonyl)-4-methylbenzene **3a** as light yellow solid (1.05 g, 53%).

#### IV. X-ray single crystal diffraction data of **3a**.

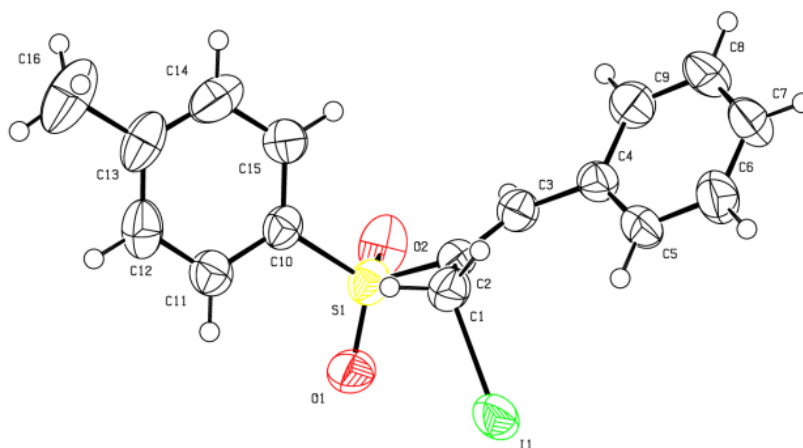

Note: Ortep drawing of **3a** with thermal ellipsoids set at 50% probability.

**Table S2.** Crystal data and structure refinement for **3a**.

|                                 |                                                 |                                  |
|---------------------------------|-------------------------------------------------|----------------------------------|
| Identification code             | <b>3a</b>                                       |                                  |
| Empirical formula               | $\text{C}_{16}\text{H}_{15}\text{IO}_2\text{S}$ |                                  |
| Formula weight                  | 398.24                                          |                                  |
| Temperature                     | 293(2) K                                        |                                  |
| Wavelength                      | 1.54184                                         |                                  |
| Crystal system, space group     | Monoclinic, $P2_1/c$                            |                                  |
| Unit cell dimensions            | $a = 7.5922(4) \text{ \AA}$                     | $\alpha = 90.00 \text{ deg.}$    |
|                                 | $b = 37.3596(14) \text{ \AA}$                   | $\beta = 98.554(6) \text{ deg.}$ |
|                                 | $c = 5.5648(3) \text{ \AA}$                     | $\gamma = 90.00 \text{ deg.}$    |
| Volume                          | $1560.85(13) \text{ \AA}^3$                     |                                  |
| Z, Calculated density           | 4, $1.695 \text{ Mg/m}^3$                       |                                  |
| Absorption coefficient          | $17.356 \text{ mm}^{-1}$                        |                                  |
| $F(000)$                        | 784.0                                           |                                  |
| Theta range for data collection | 9.47 to $134.128 \text{ deg.}$                  |                                  |

|                                   |                                                          |
|-----------------------------------|----------------------------------------------------------|
| Limiting indices                  | $-9 \leq h \leq 9, -41 \leq k \leq 44, -6 \leq l \leq 5$ |
| Reflections collected / unique    | 5981 / 2778 [R(int) = 0.0314]                            |
| Completeness to theta = 67.031    | 99.9 %                                                   |
| Absorption correction             | Empirical                                                |
| Refinement method                 | SHELXL                                                   |
| Data / restraints / parameters    | 2778/0/182                                               |
| Goodness-of-fit on F <sup>2</sup> | 1.040                                                    |
| Final R indices [I > 2sigma(I)]   | R1 = 0.0443, wR2 = 0.1076                                |
| R indices (all data)              | R1 = 0.0610, wR2 = 0.1189                                |
| Largest diff. peak and hole       | 0.95 and -0.63 e.Å <sup>-3</sup>                         |

**Table S3.** Bond lengths [Å] and angles [deg] for **3a**.

|                |          |                  |           |
|----------------|----------|------------------|-----------|
| C(1)-C(2)      | 1.472(7) | C(10)-C(11)      | 1.392(8)  |
| C(1)-I(1)      | 2.171(5) | C(10)-C(15)      | 1.367(8)  |
| C(2)-C(3)      | 1.338(7) | C(10)-S(1)       | 1.773(5)  |
| C(2)-S(1)      | 1.772(5) | C(11)-C(12)      | 1.385(9)  |
| C(3)-C(4)      | 1.471(7) | C(12)-C(13)      | 1.385(10) |
| C(4)-C(5)      | 1.380(8) | C(13)-C(14)      | 1.383(10) |
| C(4)-O(9)      | 1.393(7) | C(13)-C(16)      | 1.507(9)  |
| C(5)-C(6)      | 1.381(8) | C(14)-C(15)      | 1.380(9)  |
| C(6)-C(7)      | 1.358(9) | O(1)-S(1)        | 1.434(4)  |
| C(7)-C(8)      | 1.383(9) | O(2)-S(1)        | 1.437(5)  |
| C(8)-C(9)      | 1.376(8) |                  |           |
| C(2)-C(1)-I(1) | 114.9(2) | C(15)-C(10)-S(1) | 120.4(5)  |

|                      |           |                         |           |
|----------------------|-----------|-------------------------|-----------|
| C(1)-C(2)-S(3)       | 114.9(17) | C(12)-C(11)-C(10)       | 118.5(6)  |
| C(3)-C(2)-C(1)       | 128.7(17) | C(11)-C(12)-C(13)       | 122.0(6)  |
| C(3)-C(2)-S(1)       | 116.3(17) | C(12)-C(13)-C(16)       | 120.5(7)  |
| C(2)-C(3)-C(4)       | 128.7(19) | C(14)-C(13)-C(12)       | 117.8(6)  |
| C(5)-C(4)-C(3)       | 123.6(18) | C(14)-C(13)-C(16)       | 121.7(7)  |
| C(5)-C(4)-C(9)       | 117.6(2)  | C(15)-C(14)-C(13)       | 121.4(7)  |
| C(9)-C(4)-C(3)       | 118.7(17) | C(10)-C(15)-C(14)       | 120.0(6)  |
| C(4)-C(5)-C(6)       | 120.8(2)  | C(3)-S(1)-C(10)         | 104.5(2)  |
| C(7)-C(6)-C(5)       | 121.1(18) | O(1)-S(1)-C(2)          | 108.8(2)  |
| C(6)-C(7)-C(8)       | 119.3(2)  | O(1)-S(1)-C(10)         | 107.8(3)  |
| C(9)-C(8)-C(7)       | 119.9(3)  | O(1)-S(1)-O(2)          | 118.2(3)  |
| C(8)-C(9)-C(4)       | 121.3(2)  | O(2)-S(1)-C(2)          | 109.5(3)  |
| C(11)-C(10)-S(1)     | 119.0(18) | O(2)-S(1)-C(10)         | 107.4(3)  |
| C(15)-C(10)-C(11)    | 120.5(19) |                         |           |
| C(1)-C(2)-C(3)-C(4)  | 5.8(9)    | C(11)-C(10)-C(15)-C(14) | -0.2(9)   |
| C(1)-C(2)-S(1)-C(10) | 62.9(4)   | C(11)-C(10)-S(1)-C(2)   | -122.8(4) |
| C(1)-C(2)-S(1)-O(1)  | -51.8(5)  | C(11)-C(10)-S(1)-O(1)   | -7.2(5)   |
| C(1)-C(2)-S(1)-O(2)  | 177.7(4)  | C(11)-C(10)-S(1)-O(1)   | 121.0(5)  |
| C(2)-C(3)-C(4)-C(5)  | 31.2(10)  | C(11)-C(12)-C(13)-C(14) | 0.3(9)    |
| C(2)-C(3)-C(4)-C(9)  | -150.4(6) | C(11)-C(12)-C(13)-C(16) | -177.2(6) |
| C(3)-C(2)-S(1)-C(10) | -112.6(4) | C(12)-C(13)-C(14)-C(15) | 0.4(10)   |
| C(3)-C(2)-S(1)-O(1)  | 132.7(4)  | C(13)-C(14)-C(15)-C(10) | -0.4(10)  |

|                         |          |                         |           |
|-------------------------|----------|-------------------------|-----------|
| C(3)-C(2)-S(1)-O(2)     | 2.1(5)   | C(15)-C(10)-C(11)-C(12) | 0.8(8)    |
| C(3)-C(4)-C(5)-C(6)     | 178.2(6) | C(15)-C(10)-S(1)-C(2)   | 59.9(5)   |
| C(3)-C(4)-C(9)-C(8)     | 179.8(6) | C(15)-C(10)-S(1)-O(1)   | 175.5(5)  |
| C(4)-C(5)-C(6)-C(7)     | 0.7(12)  | C(15)-C(10)-S(1)-O(2)   | -56.3(5)  |
| C(5)-C(4)-C(9)-C(8)     | -1.7(9)  | C(16)-C(13)-C(14)-C(15) | 177.9(6)  |
| C(5)-C(6)-C(7)-C(8)     | 0.7(12)  | I(1)-C(1)-C(2)-C(3)     | -96.3(6)  |
| C(6)-C(7)-C(8)-C(9)     | -2.7(11) | I(1)-C(1)-C(2)-S(1)     | 88.8(4)   |
| C(7)-C(8)-C(9)-C(4)     | 3.2(10)  | S(1)-C(2)-C(3)-C(4)     | -179.4(5) |
| C(9)-C(4)-C(5)-C(6)     | -0.2(10) | S(1)-C(10)-C(11)-C(12)  | -176.5(4) |
| C(10)-C(11)-C(12)-C(13) | -0.8(9)  | S(1)-C(10)-C(15)-C(14)  | 177.1(5)  |

## V. Analytical Data

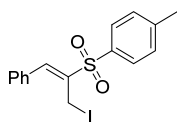

### (*E*)-1-((3-Iodo-1-phenylprop-1-en-2-yl)sulfonyl)-4-methylbenzene (3a)

The product was isolated by flash chromatography (eluent: PE/EA = 50/1) as a light yellow solid (84 mg, 70%). mp: 119-120 °C; <sup>1</sup>H NMR (600 MHz, CDCl<sub>3</sub>) δ 7.98 (s, 1H), 7.86 (d, *J* = 8.4 Hz, 2H), 7.63 (d, *J* = 7.2 Hz, 2H), 7.55-7.41 (m, 3H), 7.37 (d, *J* = 7.8 Hz, 2H), 4.30 (s, 2H), 2.45 (s, 3H). <sup>13</sup>C NMR (100 MHz, CDCl<sub>3</sub>) δ 145.0, 140.3, 138.8, 137.0, 133.2, 130.4, 130.1, 129.3, 128.8, 21.8, -5.8. HRMS (ESI), *m/z* calcd. for C<sub>16</sub>H<sub>15</sub>IO<sub>2</sub>SNa ([M+Na]<sup>+</sup>) 420.9730, found: 420.9725.

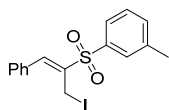

### (*E*)-1-((3-Iodo-1-phenylprop-1-en-2-yl)sulfonyl)-3-methylbenzene (3b)

The product was isolated by flash chromatography (eluent: PE/EA = 50/1) as a light yellow oil (92 mg, 77%). <sup>1</sup>H NMR (400 MHz, CDCl<sub>3</sub>) δ 7.99 (s, 1H), 7.78 (t, *J* = 3.5 Hz, 2H), 7.64 (dd, *J* = 7.6, 1.6 Hz, 2H), 7.54-7.36 (m, 5H), 4.30 (s, 2H), 2.45 (s, 3H). <sup>13</sup>C NMR (100 MHz, CDCl<sub>3</sub>) δ 140.5, 139.7, 138.6, 134.7, 133.1, 130.5, 129.34, 129.28, 129.1, 21.5, -5.8. HRMS (ESI), *m/z* calcd. for C<sub>16</sub>H<sub>15</sub>IO<sub>2</sub>SNa ([M+Na]<sup>+</sup>) 420.9730, found: 420.9733.

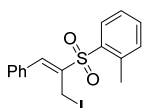

### (*E*)-1-((3-Iodo-1-phenylprop-1-en-2-yl)sulfonyl)-2-methylbenzene (3c)

The product was isolated by flash chromatography (eluent: PE/EA = 50/1) as a light yellow solid (79 mg, 66%). mp: 121-123 °C; <sup>1</sup>H NMR (400 MHz, CDCl<sub>3</sub>) δ 8.19 (d, *J* = 7.2 Hz, 1H), 8.00 (s, 1H), 7.70-7.62 (m, 2H), 7.60-7.41 (m, 5H), 7.32 (d, *J* = 7.2 Hz, 1H), 4.23 (s, 2H), 2.57 (s, 3H). <sup>13</sup>C NMR (100 MHz, CDCl<sub>3</sub>) δ 140.7, 139.2, 137.0, 136.8, 134.3, 133.0, 132.9, 131.1, 130.5, 130.4, 129.4, 126.9, 20.0, -5.8. HRMS (ESI), *m/z* calcd. for C<sub>16</sub>H<sub>15</sub>IO<sub>2</sub>SNa ([M+Na]<sup>+</sup>) 420.9730, found: 420.9722.

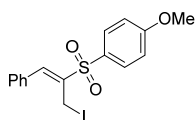

### (*E*)-1-((3-Iodo-1-phenylprop-1-en-2-yl)sulfonyl)-4-methoxybenzene (3d)

The product was isolated by flash chromatography (eluent: PE/EA = 50/1) as a light yellow solid (107 mg, 86%). mp: 130-132 °C;  $^1\text{H}$  NMR (400 MHz,  $\text{CDCl}_3$ )  $\delta$  7.97 (s, 1H), 7.93-7.84 (m, 2H), 7.62 (d,  $J$  = 6.8 Hz, 2H), 7.56-7.41 (m, 3H), 7.03 (d,  $J$  = 8.8 Hz, 2H), 4.30 (s, 2H), 3.89 (s, 3H).  $^{13}\text{C}$  NMR (100 MHz,  $\text{CDCl}_3$ )  $\delta$  164.1, 139.0, 139.1, 133.3, 131.4, 131.1, 130.4, 130.3, 129.3, 114.7, 55.9, -5.7. HRMS (ESI),  $m/z$  calcd. for  $\text{C}_{16}\text{H}_{15}\text{IO}_3\text{SNa}$  ( $[\text{M}+\text{Na}]^+$ ) 436.9679, found: 436.9677.

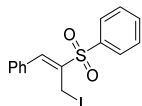

**(E)-((3-Iodo-1-phenylprop-1-en-2-yl)sulfonyl)benzene (3e)**

The product was isolated by flash chromatography (eluent: PE/EA = 50/1) as a light yellow solid (83 mg, 72%). mp: 76-78 °C;  $^1\text{H}$  NMR (600 MHz,  $\text{CDCl}_3$ )  $\delta$  8.01 (s, 1H), 7.98 (d,  $J$  = 7.2 Hz, 2H), 7.67-7.63 (m, 3H), 7.58 (t,  $J$  = 7.8 Hz, 2H), 7.51-7.45 (m, 3H), 4.30 (s, 2H).  $^{13}\text{C}$  NMR (150 MHz,  $\text{CDCl}_3$ )  $\delta$  140.7, 140.0, 138.5, 134.0, 133.1, 130.52, 130.45, 129.44, 129.37, 128.8, -5.9. HRMS (ESI),  $m/z$  calcd. for  $\text{C}_{15}\text{H}_{13}\text{IO}_2\text{SNa}$  ( $[\text{M}+\text{Na}]^+$ ) 406.9573, found: 406.9563.

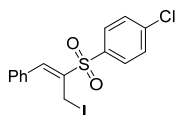

**(E)-1-Chloro-4-((3-iodo-1-phenylprop-1-en-2-yl)sulfonyl)benzene (3f)**

The product was isolated by flash chromatography (eluent: PE/EA = 50/1) as a light yellow solid (78 mg, 62%). mp: 117-118 °C;  $^1\text{H}$  NMR (600 MHz,  $\text{CDCl}_3$ )  $\delta$  8.00 (s, 1H), 7.92 (d,  $J$  = 8.6 Hz, 2H), 7.64 (d,  $J$  = 7.2 Hz, 2H), 7.56 (d,  $J$  = 8.4 Hz, 2H), 7.52-7.48 (m, 3H), 4.32 (s, 2H).  $^{13}\text{C}$  NMR (150 MHz,  $\text{CDCl}_3$ )  $\delta$  141.1, 140.8, 138.7, 138.3, 133.0, 130.7, 130.5, 130.3, 129.8, 129.5, -5.9. HRMS (ESI),  $m/z$  calcd. for  $\text{C}_{15}\text{H}_{12}\text{ClIO}_2\text{SNa}$  ( $[\text{M}+\text{Na}]^+$ ) 440.9183, found: 440.9180.

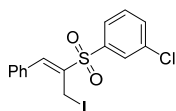

**(E)-1-Chloro-3-((3-iodo-1-phenylprop-1-en-2-yl)sulfonyl)benzene (3g)**

The product was isolated by flash chromatography (eluent: PE/EA = 50/1) as a light yellow solid (90 mg, 72%). mp: 131-132 °C;  $^1\text{H}$  NMR (400 MHz,  $\text{CDCl}_3$ )  $\delta$  8.01 (s, 1H), 7.97 (d,  $J$  = 1.6 Hz, 1H), 7.89 (d,  $J$  = 8.0 Hz, 1H), 7.66-7.61 (m, 3H), 7.54-7.48 (m, 4H), 4.32 (s, 2H).  $^{13}\text{C}$  NMR (100 MHz,  $\text{CDCl}_3$ )  $\delta$  142.0, 141.4, 138.0, 135.7, 134.1, 132.9, 130.8, 130.7, 130.6, 129.5, 128.9, 127.0, -6.0. HRMS (ESI),  $m/z$  calcd. for  $\text{C}_{15}\text{H}_{12}\text{ClIO}_2\text{SNa}$  ( $[\text{M}+\text{Na}]^+$ ) 440.9183, found: 440.9180.

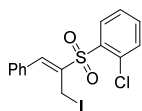

**(*E*)-1-Chloro-2-((3-iodo-1-phenylprop-1-en-2-yl)sulfonyl)benzene (3h)**

The product was isolated by flash chromatography (eluent: PE/EA = 50/1) as a light yellow solid (107 mg, 85%). mp: 128-129 °C; <sup>1</sup>H NMR (600 MHz, CDCl<sub>3</sub>) δ 8.33-8.30 (m, 1H), 8.12 (s, 1H), 7.67-7.65 (m, 2H), 7.63-7.58 (m, 1H), 7.56-7.48 (m, 5H), 4.28 (s, 2H). <sup>13</sup>C NMR (100 MHz, CDCl<sub>3</sub>) δ 143.5, 136.7, 135.5, 135.2, 133.9, 133.0, 132.7, 132.3, 130.6, 130.4, 129.4, 127.6, -5.8. HRMS (ESI), *m/z* calcd. for C<sub>15</sub>H<sub>12</sub>ClIO<sub>2</sub>SNa ([M+Na]<sup>+</sup>) 440.9183, found: 440.9187.

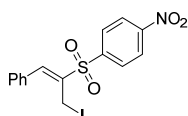

**(*E*)-1-((3-Iodo-1-phenylprop-1-en-2-yl)sulfonyl)-4-nitrobenzene (3i)**

The product was isolated by flash chromatography (eluent: PE/EA = 50/1) as a light yellow solid (103 mg, 80%). mp: 169-171 °C; <sup>1</sup>H NMR (400 MHz, CDCl<sub>3</sub>) δ 8.42 (d, *J* = 8.8 Hz, 2H), 8.19 (d, *J* = 8.8 Hz, 2H), 8.07 (s, 1H), 7.66-7.64 (m, 2H), 7.52 (dd, *J* = 2.0, 2.0 Hz, 3H), 4.36 (s, 2H). <sup>13</sup>C NMR (100 MHz, CDCl<sub>3</sub>) δ 151.0, 146.3, 142.5, 137.4, 132.6, 131.1, 130.6, 130.2, 129.6, -5.9. HRMS (ESI), *m/z* calcd. for C<sub>15</sub>H<sub>12</sub>INO<sub>4</sub>SNa ([M+Na]<sup>+</sup>) 451.9424, found: 451.9425.

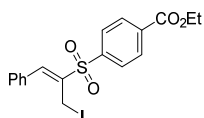

**Ethyl (*E*)-4-((3-iodo-1-phenylprop-1-en-2-yl)sulfonyl)benzoate (3j)**

The product was isolated by flash chromatography (eluent: PE/EA = 50/1) as a light yellow solid (94 mg, 69%). mp: 151-152 °C; <sup>1</sup>H NMR (400 MHz, CDCl<sub>3</sub>) δ 8.22 (d, *J* = 8.4 Hz, 2H), 8.07 (s, 1H), 8.04 (d, *J* = 4.0 Hz, 2H), 7.65 (d, *J* = 2.0, 1H), 7.63 (s, 1H), 7.52-7.48 (m, 3H), 4.42 (q, *J* = 7.2 Hz, 2H), 4.33 (s, 1H), 1.42 (t, *J* = 7.2 Hz, 3H). <sup>13</sup>C NMR (100 MHz, CDCl<sub>3</sub>) δ 165.2, 144.1, 141.5, 138.1, 135.4, 132.9, 130.8, 130.5, 129.5, 128.8, 62.0, 14.4, -6.0. HRMS (ESI), *m/z* calcd. for C<sub>18</sub>H<sub>17</sub>IO<sub>4</sub>SNa ([M+Na]<sup>+</sup>) 478.9784, found: 478.9789.

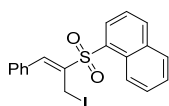

**(*E*)-1-((3-Iodo-1-phenylprop-1-en-2-yl)sulfonyl)naphthalene (3k)**



The product was isolated by flash chromatography (eluent: PE/EA = 50/1) as a light yellow oil (82 mg, 63%). <sup>1</sup>H NMR (400 MHz, CDCl<sub>3</sub>) δ 8.62 (s, 1H), 8.08 (s, 1H), 8.05-8.00 (m, 2H), 7.93 (d, *J* = 8.0 Hz, 1H), 7.88 (dd, *J* = 8.4, 1.6 Hz, 1H), 7.7-7.62 (m, 4H), 7.52-7.46 (m, 3H), 4.34 (s, 2H). <sup>13</sup>C NMR (100 MHz, CDCl<sub>3</sub>) δ 140.3, 138.3, 136.0, 134.5, 133.6, 133.0, 132.2, 130.4, 129.4, 128.7, 127.1, 124.7, 124.0, -6.4. HRMS (ESI), *m/z* calcd. for C<sub>19</sub>H<sub>15</sub>IO<sub>2</sub>SNa ([M+Na]<sup>+</sup>) 456.9730, found: 456.9728.

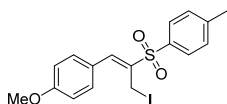

**(*E*)-1-((3-Iodo-1-(4-methoxyphenyl)prop-1-en-2-yl)sulfonyl)-4-methylbenzene (3l)**

The product was isolated by flash chromatography (eluent: PE/EA = 50/1) as a light yellow solid (113 mg, 88%). mp: 127-129 °C; <sup>1</sup>H NMR (400 MHz, CDCl<sub>3</sub>) δ 7.91 (s, 1H), 7.85 (d, *J* = 8.4 Hz, 2H), 7.62 (d, *J* = 8.8 Hz, 2H), 7.36 (d, *J* = 8.4 Hz, 2H), 7.02 (d, *J* = 8.8 Hz, 2H), 4.33 (s, 2H), 3.87 (s, 3H), 2.45 (s, 3H). <sup>13</sup>C NMR (100 MHz, CDCl<sub>3</sub>) δ 161.4, 144.7, 140.0, 137.2, 135.4, 133.0, 130.0, 128.6, 125.6, 114.85, 55.6, 21.8, -4.4. HRMS (ESI), *m/z* calcd. for C<sub>17</sub>H<sub>17</sub>IO<sub>3</sub>SNa ([M+Na]<sup>+</sup>) 450.9835, found: 450.9835.

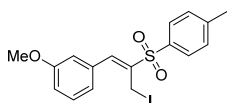

**(*E*)-1-(3-Iodo-2-tosylprop-1-en-1-yl)-3-methoxybenzene (3m)**

The product was isolated by flash chromatography (eluent: PE/EA = 50/1) as a light yellow solid (99 mg, 77%). mp: 180-182 °C; <sup>1</sup>H NMR (400 MHz, CDCl<sub>3</sub>) δ 7.96 (s, 1H), 7.87 (d, *J* = 8.4 Hz, 2H), 7.39-7.36 (m, 3H), 7.20 (d, *J* = 8.0 Hz, 2H), 7.02-7.0 (m, 1H), 4.30 (s, 2H), 3.86 (s, 3H), 2.46 (s, 3H). <sup>13</sup>C NMR (100 MHz, CDCl<sub>3</sub>) δ 160.2, 145.1, 140.3, 139.0, 137.0, 134.4, 130.4, 130.1, 128.9, 123.0, 116.8, 114.6, 55.7, 21.9, -5.7. HRMS (ESI), *m/z* calcd. for C<sub>17</sub>H<sub>17</sub>IO<sub>3</sub>SNa ([M+Na]<sup>+</sup>) 450.9835, found: 450.9821.

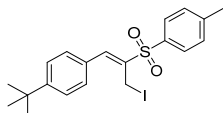

**(*E*)-1-(Tert-butyl)-4-(3-iodo-2-tosylprop-1-en-1-yl)benzene (3n)**

The product was isolated by flash chromatography (eluent: PE/EA = 50/1) as a light yellow oil (117 mg, 86%). <sup>1</sup>H NMR (400 MHz, CDCl<sub>3</sub>) δ 8.0 (s, 1H), 7.85 (d, *J* = 8.0 Hz, 2H), 7.61 (d, *J* = 8.0 Hz, 2H), 7.53 (d, *J* = 8.0 Hz, 2H), 7.36 (d, *J* = 8.0 Hz, 2H), 4.32 (s, 2H), 2.45 (s, 3H), 1.34 (s, 9H). <sup>13</sup>C

NMR (100 MHz, CDCl<sub>3</sub>)  $\delta$  154.3, 144.9, 140.3, 137.5, 137.2, 130.7, 130.3, 130.0, 128.7, 126.4, 35.2, 31.2, 21.8, -5.0. HRMS (ESI),  $m/z$  calcd. for C<sub>20</sub>H<sub>24</sub>IO<sub>2</sub>S ([M+H]<sup>+</sup>) 455.0536, found: 455.0528.

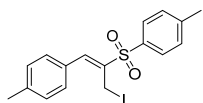

**(E)-1-((3-Iodo-1-(p-tolyl)prop-1-en-2-yl)sulfonyl)-4-methylbenzene (3o)**

The product was isolated by flash chromatography (eluent: PE/EA = 50/1) as a light yellow solid (94 mg, 76%). mp: 182-183 °C; <sup>1</sup>H NMR (400 MHz, CDCl<sub>3</sub>)  $\delta$  7.94 (s, 1H), 7.86 (d,  $J$  = 8.4 Hz, 2H), 7.54 (d,  $J$  = 8.0 Hz, 2H), 7.37 (d,  $J$  = 8.0 Hz, 2H), 7.31 (d,  $J$  = 8.0 Hz, 2H), 4.31 (s, 2H), 2.45 (s, 3H), 2.39 (s, 3H). <sup>13</sup>C NMR (100 MHz, CDCl<sub>3</sub>)  $\delta$  144.9, 141.2, 140.4, 137.5, 137.2, 130.7, 130.4, 130.1, 130.0, 128.8, 21.8, 21.7, -5.2. HRMS (ESI),  $m/z$  calcd. for C<sub>17</sub>H<sub>17</sub>IO<sub>2</sub>SNa ([M+Na]<sup>+</sup>) 434.9886, found: 434.9885.

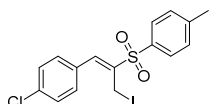

**(E)-1-Chloro-4-(3-iodo-2-tosylprop-1-en-1-yl)benzene (3p)**

The product was isolated by flash chromatography (eluent: PE/EA = 50/1) as a light yellow solid (98 mg, 76%). mp: 198-200 °C; <sup>1</sup>H NMR (400 MHz, CDCl<sub>3</sub>)  $\delta$  7.92 (s, 1H), 7.85 (d,  $J$  = 8.2 Hz, 2H), 7.57 (d,  $J$  = 8.2 Hz, 2H), 7.47 (d,  $J$  = 8.2 Hz, 2H), 7.38 (d,  $J$  = 8.0 Hz, 2H), 4.25 (s, 2H), 2.46 (s, 3H). <sup>13</sup>C NMR (100 MHz, CDCl<sub>3</sub>)  $\delta$  145.2, 139.4, 138.7, 136.7, 136.6, 131.7, 131.6, 130.2, 129.7, 128.9, 21.9, -6.2. HRMS (ESI),  $m/z$  calcd. for C<sub>16</sub>H<sub>14</sub>ClIO<sub>2</sub>SNa ([M+Na]<sup>+</sup>) 454.9340, found: 454.9347.

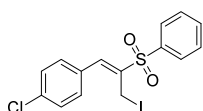

**(E)-1-Chloro-4-(3-iodo-2-(phenylsulfonyl)prop-1-en-1-yl)benzene (3q)**

The product was isolated by flash chromatography (eluent: PE/EA = 50/1) as a light yellow solid (93 mg, 74%). mp: 120-121 °C; <sup>1</sup>H NMR (400 MHz, CDCl<sub>3</sub>)  $\delta$  7.98-7.94 (m, 3H), 7.68-7.64 (m, 1H), 7.60-7.56 (m, 4H), 7.46 (d,  $J$  = 8.8 Hz, 2H), 4.26 (s, 2H). <sup>13</sup>C NMR (100 MHz, CDCl<sub>3</sub>)  $\delta$  139.8, 139.16, 139.13, 136.7, 134.1, 131.7, 131.5, 129.7, 129.5, 128.8, -6.4. HRMS (ESI),  $m/z$  calcd. for C<sub>15</sub>H<sub>12</sub>ClIO<sub>2</sub>SNa ([M+Na]<sup>+</sup>) 440.9183, found: 440.9181.

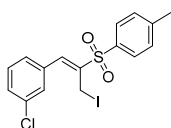

**(E)-1-Chloro-3-(3-iodo-2-tosylprop-1-en-1-yl)benzene (3r)**

The product was isolated by flash chromatography (eluent: PE/EA = 50/1) as a light yellow solid (80 mg, 62%). mp: 124-125 °C; <sup>1</sup>H NMR (400 MHz, CDCl<sub>3</sub>) δ 7.91 (s, 1H), 7.85 (d, *J* = 8.2 Hz, 2H), 7.60 (s, 1H), 7.52-7.48 (m, 1H), 7.43 (d, *J* = 5.2 Hz, 2H), 7.39 (d, *J* = 8.0 Hz, 2H), 4.24 (s, 2H), 2.46 (s, 3H). <sup>13</sup>C NMR (100 MHz, CDCl<sub>3</sub>) δ 145.3, 140.5, 138.5, 136.6, 135.3, 134.9, 130.6, 130.3, 130.2, 130.0, 128.9, 128.1, 21.9, -6.8. HRMS (ESI), *m/z* calcd. for C<sub>16</sub>H<sub>14</sub>ClIO<sub>2</sub>SNa ([M+Na]<sup>+</sup>) 454.9340, found: 454.9337.

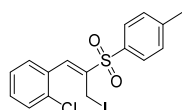**(E)-1-Chloro-2-(3-iodo-2-tosylprop-1-en-1-yl)benzene (3s)**

The product was isolated by flash chromatography (eluent: PE/EA = 50/1) as a light yellow solid (101 mg, 78%). mp: 76-78 °C; <sup>1</sup>H NMR (400 MHz, CDCl<sub>3</sub>) δ 8.16 (s, 1H), 7.88 (d, *J* = 8.0 Hz, 2H), 7.69 (t, *J* = 4.6 Hz, 1H), 7.48-7.46 (m, 1H), 7.41-7.37 (m, 4H), 4.12 (s, 2H), 2.46 (s, 3H). <sup>13</sup>C NMR (100 MHz, CDCl<sub>3</sub>) δ 145.2, 141.5, 138.1, 136.7, 134.9, 132.0, 131.1, 130.3, 130.2, 128.9, 128.7, 127.3, 21.9, -7.8. HRMS (ESI), *m/z* calcd. for C<sub>16</sub>H<sub>14</sub>ClIO<sub>2</sub>SNa ([M+Na]<sup>+</sup>) 454.9340, found: 454.9331.

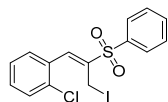**(E)-1-Chloro-2-(3-iodo-2-(phenylsulfonyl)prop-1-en-1-yl)benzene (3t)**

The product was isolated by flash chromatography (eluent: PE/EA = 50/1) as a light yellow solid (90 mg, 72%). mp: 78-80 °C; <sup>1</sup>H NMR (600 MHz, CDCl<sub>3</sub>) δ 8.18 (s, 1H), 8.01 (d, *J* = 7.2 Hz, 2H), 7.70-7.65 (m, 2H), 7.59 (t, *J* = 7.7 Hz, 2H), 7.48-7.46 (m, 1H), 7.40-7.38 (m, 2H), 4.12 (s, 2H). <sup>13</sup>C NMR (150 MHz, CDCl<sub>3</sub>) δ 141.1, 139.6, 138.4, 134.9, 134.1, 131.8, 131.2, 130.3, 129.5, 128.8, 128.7, 127.3, -7.9. HRMS (ESI), *m/z* calcd. for C<sub>15</sub>H<sub>12</sub>ClIO<sub>2</sub>SNa ([M+Na]<sup>+</sup>) 440.9183, found: 440.9186.

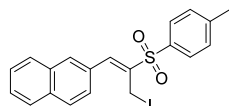**(E)-2-(3-Iodo-2-tosylprop-1-en-1-yl)naphthalene (3u)**

The product was isolated by flash chromatography (eluent: PE/EA = 50/1) as a light yellow solid (74 mg, 55%). mp: 159-160 °C; <sup>1</sup>H NMR (600 MHz, CDCl<sub>3</sub>) δ 8.18 (s, 1H), 8.14 (s, 1H), 7.93 (d, *J* = 8.4 Hz, 2H), 7.89 (d, *J* = 7.8 Hz, 2H), 7.86 (d, *J* = 7.8 Hz, 1H), 7.68 (d, *J* = 8.4 Hz, 1H), 7.60-7.54 (m,

2H), 7.38 (d,  $J = 8.4$  Hz, 2H), 4.40 (s, 2H), 2.46 (s, 3H).  $^{13}\text{C}$  NMR (150 MHz,  $\text{CDCl}_3$ )  $\delta$  145.0, 140.4, 138.8, 137.1, 133.8, 133.3, 131.3, 130.7, 130.1, 129.1, 129.0, 128.9, 128.1, 128.0, 127.2, 126.6, 21.9, -5.4. HRMS (ESI),  $m/z$  calcd. for  $\text{C}_{20}\text{H}_{17}\text{IO}_2\text{SNa}$  ( $[\text{M}+\text{Na}]^+$ ) 470.9886, found: 470.9895.

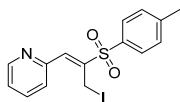

**(*E*)-2-(3-iodo-2-tosylprop-1-en-1-yl)pyridine (3v)**

The product was isolated by flash chromatography (eluent: PE/EA = 50/1) as a light yellow solid (92 mg, 82%). mp: 104-105 °C;  $^1\text{H}$  NMR (400 MHz,  $\text{CDCl}_3$ )  $\delta$  8.76 (d,  $J = 5.6$  Hz, 1H), 7.86 (d,  $J = 8.4$  Hz, 2H), 7.78 (s, 1H), 7.76 (m, 1H), 7.52 (d,  $J = 7.6$  Hz, 1H), 7.37 (d,  $J = 8.0$  Hz, 1H), 5.00 (s, 2H), 2.45 (s, 3H).  $^{13}\text{C}$  NMR (100 MHz,  $\text{CDCl}_3$ )  $\delta$  152.9, 150.5, 145.1, 143.6, 136.9, 136.6, 135.5, 130.1, 129.0, 128.6, 124.0, 21.9, -5.0. HRMS (ESI),  $m/z$  calcd. for  $\text{C}_{15}\text{H}_{14}\text{INO}_2\text{SNa}$  ( $[\text{M}+\text{Na}]^+$ ) 421.9682, found: 421.9681.

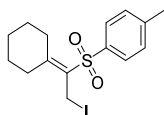

**1-((1-cyclohexylidene-2-iodoethyl)sulfonyl)-4-methylbenzene (3w)**

The product was isolated by flash chromatography (eluent: PE/EA = 50/1) as a light yellow solid (40 mg, 38%). mp: 104-105 °C;  $^1\text{H}$  NMR (400 MHz,  $\text{CDCl}_3$ )  $\delta$  7.92 (d,  $J = 8.0$  Hz, 1H), 7.32 (d,  $J = 8.0$  Hz, 1H), 4.46 (s, 2H), 2.54 (t,  $J = 8.0$  Hz, 2H), 2.44 (s, 3H), 2.27 (t,  $J = 8.0$  Hz, 2H), 1.73-1.77 (m, 2H), 1.54-1.48 (m, 2H), 1.31-1.25 (m, 2H).  $^{13}\text{C}$  NMR (100 MHz,  $\text{CDCl}_3$ )  $\delta$  161.1, 144.1, 139.8, 132.9, 129.7, 127.5, 34.5, 33.0, 27.4, 27.2, 25.8, 21.8. HRMS (ESI),  $m/z$  calcd. for  $\text{C}_{15}\text{H}_{19}\text{IO}_2\text{SNa}$  ( $[\text{M}+\text{Na}]^+$ ) 413.0043, found: 413.0043.

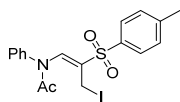

**(*E*)-*N*-(3-Iodo-2-tosylprop-1-en-1-yl)-*N*-phenylacetamide (3x)**

The product was isolated by flash chromatography (eluent: PE/EA = 50/1) as a light yellow solid (115 mg, 84%). mp: 147-149 °C;  $^1\text{H}$  NMR (600 MHz,  $\text{CDCl}_3$ )  $\delta$  8.66 (s, 1H), 7.78 (d,  $J = 7.8$  Hz, 2H), 7.50 (d,  $J = 7.2$  Hz, 3H), 7.41 (d,  $J = 7.2$  Hz, 2H), 7.32 (d,  $J = 7.8$  Hz, 2H), 3.36 (s, 2H), 2.43 (s, 4H), 2.00 (s, 4H).  $^{13}\text{C}$  NMR (100 MHz,  $\text{CDCl}_3$ )  $\delta$  170.7, 144.5, 138.4, 137.6, 136.3, 130.3, 130.2, 129.9, 129.2,

128.6, 121.4, 23.1, 21.8, -7.6. HRMS (ESI),  $m/z$  calcd. for  $C_{18}H_{18}INO_3SNa$  ( $[M+Na]^+$ ) 477.9944, found: 477.9958.

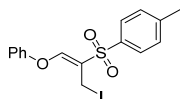

**(E)-1-((3-Iodo-1-phenoxyprop-1-en-2-yl)sulfonyl)-4-methylbenzene (3y)**

The product was isolated by flash chromatography (eluent: PE/EA = 50/1) as a light yellow solid (71 mg, 57%). mp: 118-120 °C;  $^1H$  NMR (400 MHz,  $CDCl_3$ )  $\delta$  7.94 (s, 1H), 7.82 (d,  $J$  = 8.44 Hz, 2H), 7.44-7.36 (m, 4H), 7.24 (d,  $J$  = 7.6 Hz, 1H), 7.16 (d,  $J$  = 8.4 Hz, 2H), 4.15 (s, 2H), 2.46 (s, 3H).  $^{13}C$  NMR (100 MHz,  $CDCl_3$ )  $\delta$  156.4, 154.4, 144.8, 137.4, 130.3, 130.1, 129.8, 128.4, 125.8, 122.2, 117.7, 115.4, 21.8, -10.2. HRMS (ESI),  $m/z$  calcd. for  $C_{16}H_{15}IO_3SNa$  ( $[M+Na]^+$ ) 436.9679, found: 436.9697.

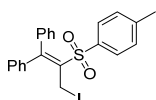

**(3-Iodo-2-tosylprop-1-ene-1,1-diyl)dibenzene (3z)**

The product was isolated by flash chromatography (eluent: PE/EA = 50/1) as a light yellow solid (121 mg, 85%). mp: 190-191 °C;  $^1H$  NMR (400 MHz,  $CDCl_3$ )  $\delta$  7.37-7.32 (m, 5H), 7.31-7.28 (m, 2H), 7.19 (t,  $J$  = 7.4 Hz, 1H), 7.09 (t,  $J$  = 7.6 Hz, 2H), 7.04 (d,  $J$  = 8.4 Hz, 2H), 6.92 (d,  $J$  = 7.2 Hz, 2H), 4.45 (s, 1H), 2.35 (s, 3H).  $^{13}C$  NMR (100 MHz,  $CDCl_3$ )  $\delta$  154.8, 143.7, 141.0, 140.5, 138.5, 137.6, 129.1, 128.9, 128.8, 128.3, 128.0, 127.7, 126.7, 100.1, 21.7, -0.7. HRMS (ESI),  $m/z$  calcd. for  $C_{22}H_{19}IO_2SNa$  ( $[M+Na]^+$ ) 497.0043, found: 497.0046.

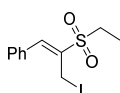

**(E)-(2-(ethylsulfonyl)-3-iodoprop-1-en-1-yl)benzene (3aa)**

The product was isolated by flash chromatography (eluent: PE/EA = 50/1) as a light yellow solid (80 mg, 84%). mp: 97-98 °C;  $^1H$  NMR (400 MHz,  $CDCl_3$ )  $\delta$  7.72 (s, 1H), 7.65 (s, 1H), 7.63 (s, 1H), 7.54-7.48 (m, 3H), 4.47 (s, 2H), 3.36 (q,  $J$  = 7.6 Hz, 2H), 1.39 (t,  $J$  = 7.4 Hz, 3H).  $^{13}C$  NMR (100 MHz,  $CDCl_3$ )  $\delta$  143.0, 136.3, 132.9, 130.6, 130.3, 129.4, 50.5, 7.2, -3.7. HRMS (ESI),  $m/z$  calcd. for  $C_{11}H_{13}IO_2SNa$  ( $[M+Na]^+$ ) 358.9572, found: 358.9573.

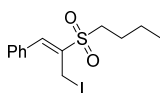

**(E)-(2-(butylsulfonyl)-3-iodoprop-1-en-1-yl)benzene (3ab)**

The product was isolated by flash chromatography (eluent: PE/EA = 50/1) as a light yellow solid (100 mg, 96%). mp: 47-48 °C; <sup>1</sup>H NMR (400 MHz, CDCl<sub>3</sub>) δ 7.72 (s, 1H), 7.65 (s, 1H), 7.64 (s, 1H) 7.55-7.48 (m, 3H), 4.48 (s, 2H), 3.35-3.31 (m, 2H), 1.84-1.76 (m, 2H), 1.55-1.46 (m, 2H), 1.00-0.94 (m, 3H). <sup>13</sup>C NMR (100 MHz, CDCl<sub>3</sub>) δ 142.7, 136.9, 133.0, 130.6, 130.4, 129.4, 55.9, 24.5, 21.7, 13.8, -3.6. HRMS (ESI), m/z calcd. for C<sub>13</sub>H<sub>17</sub>IO<sub>2</sub>SNa ([M+Na]<sup>+</sup>) 386.9886, found: 386.9886.

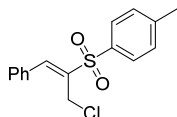

**(E)-1-((3-chloro-1-phenylprop-1-en-2-yl)sulfonyl)-4-methylbenzene (3ac)**

The product was isolated by flash chromatography (eluent: PE/EA = 20/1) as a light yellow solid (45 mg, 49%). mp: 105-106 °C; <sup>1</sup>H NMR (400 MHz, CDCl<sub>3</sub>) δ 8.03 (s, 1H), 7.85 (d, *J* = 8.4 Hz, 2H), 7.65-7.57 (m, 2H), 7.46 (m, 3H), 7.35 (d, *J* = 8.0 Hz, 2H), 4.50 (s, 2H), 2.45 (s, 3H). <sup>13</sup>C NMR (150 MHz, CDCl<sub>3</sub>) δ 144.9, 143.1, 137.9, 137.2, 132.6, 130.9, 130.2, 130.0, 129.3, 128.7, 37.5, 21.8. HRMS (ESI), m/z calcd. for C<sub>16</sub>H<sub>15</sub>ClO<sub>2</sub>SNa ([M+Na]<sup>+</sup>) 329.0373, found: 329.0367.

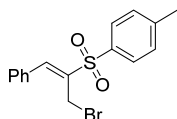

**(E)-1-((3-bromo-1-phenylprop-1-en-2-yl)sulfonyl)-4-methylbenzene (3ad)**

The product was isolated by flash chromatography (eluent: PE/EA = 20/1) as a light yellow solid (68 mg, 65%). mp: 102-104 °C; <sup>1</sup>H NMR (400 MHz, CDCl<sub>3</sub>) δ 8.01 (s, 1H), 7.86 (d, *J* = 8.0 Hz, 2H), 7.64 (d, *J* = 6.0 Hz, 2H), 7.48 (d, *J* = 6.8 Hz, 3H), 7.36 (d, *J* = 8.0 Hz, 2H), 4.39 (s, 2H), 2.45 (s, 3H). <sup>13</sup>C NMR (150 MHz, CDCl<sub>3</sub>) δ 144.9, 142.4, 138.1, 137.2, 132.8, 130.8, 130.3, 130.0, 129.3, 128.8, 23.7, 21.8. HRMS (ESI), m/z calcd. for C<sub>16</sub>H<sub>16</sub>BrO<sub>2</sub>S ([M+H]<sup>+</sup>) 351.0049, found: 351.0050

## VI. References

- [1] Huang, Z.; Lu, Q.; Liu, Y. *Org. Lett.*, **2016**, *18*, 3940.
- [2] J. H. Hu, Y. J. Xie, H. M. Huang. *Angew. Chem. Int. Ed.*, **2014**, *53*, 7272.
- [3] a) D. Gelman, S. L. Buchwald. *Angew. Chem. Int. Ed.*, **2003**, *42*, 5993. b) X. X. Fan, Y. H. Liu. *Organometallics.*, **2013**, *32*, 1636.
- [4] Y. Li, J. Y. Chen, R. H. Qiu. *Tetrahedron Lett.*, **2015**, *56*, 5504.
- [5] M. Hong, Y. G. Li, Y. H. Li. *Macromolecular Rapid Commun.*, 2012, 1.
- [6] S. Madabhushi, R. Jillella. *Green Chem.*, **2014**, *16*, 3125.

# VII. $^1\text{H}$ NMR and $^{13}\text{C}$ NMR Spectra Copies

## Compound 3a

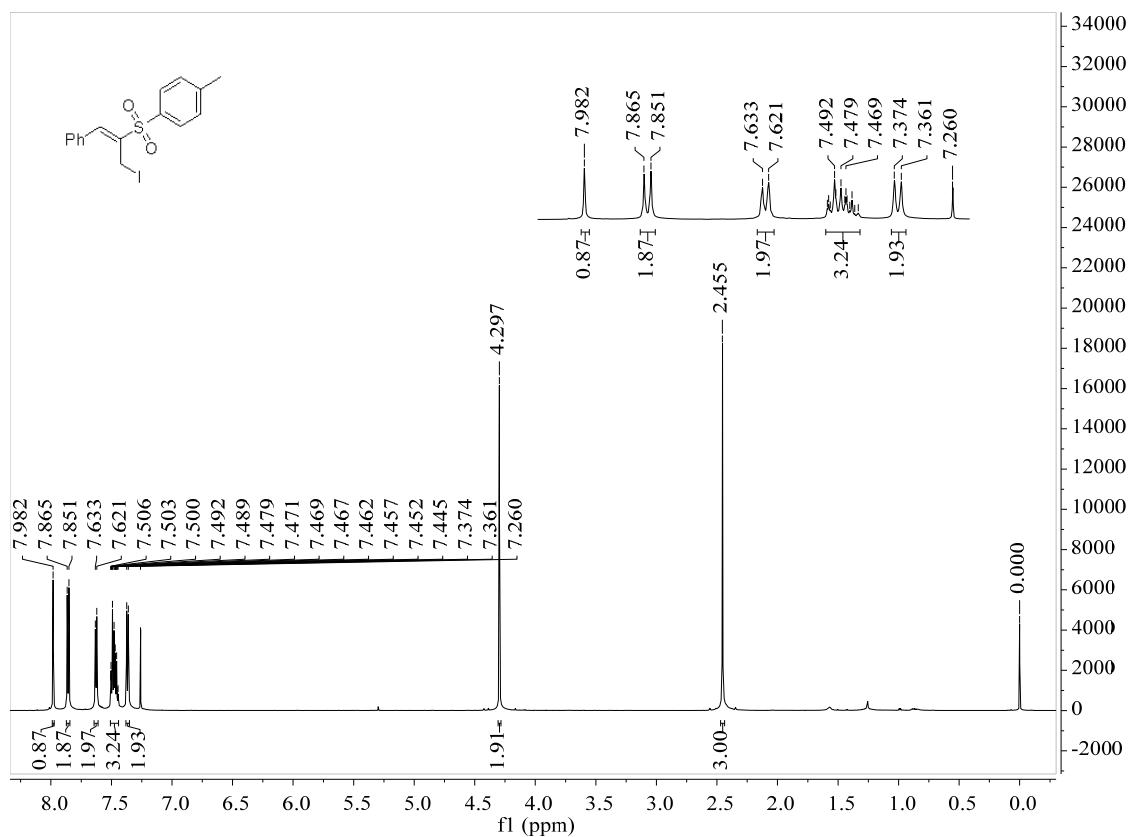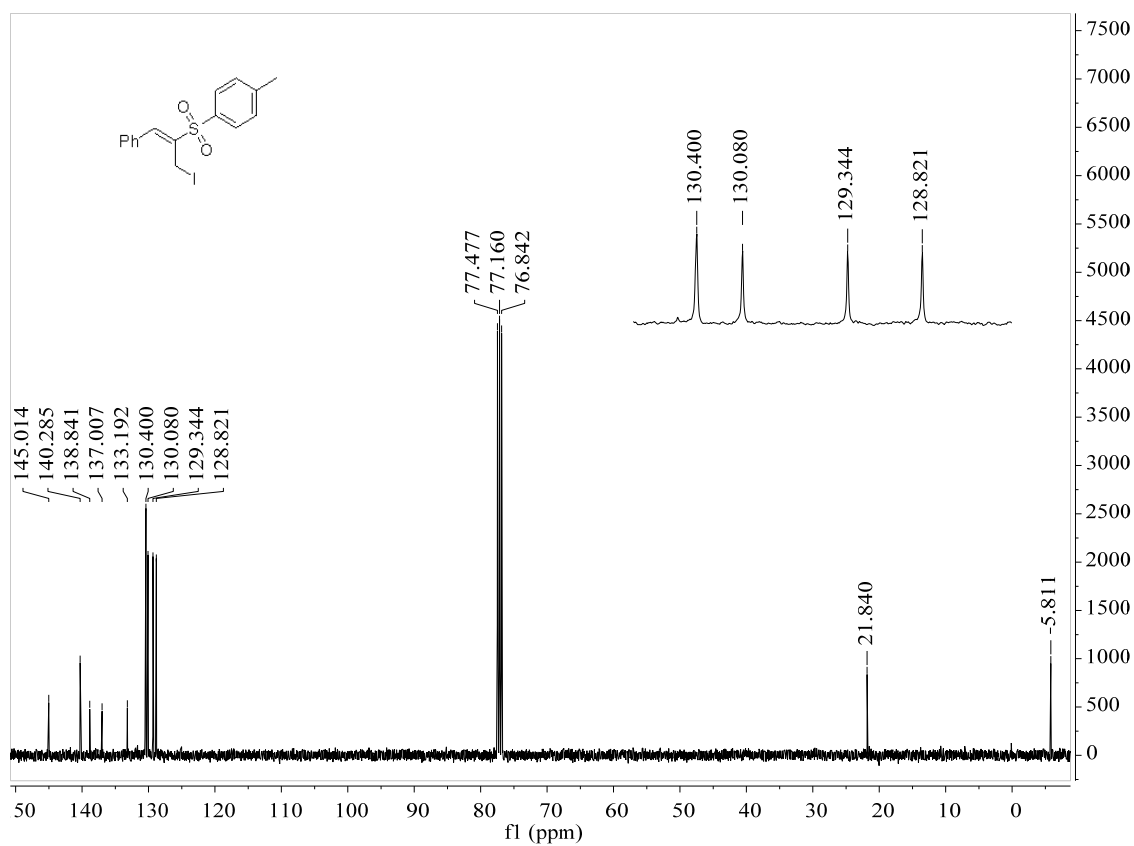



Compound **3b**

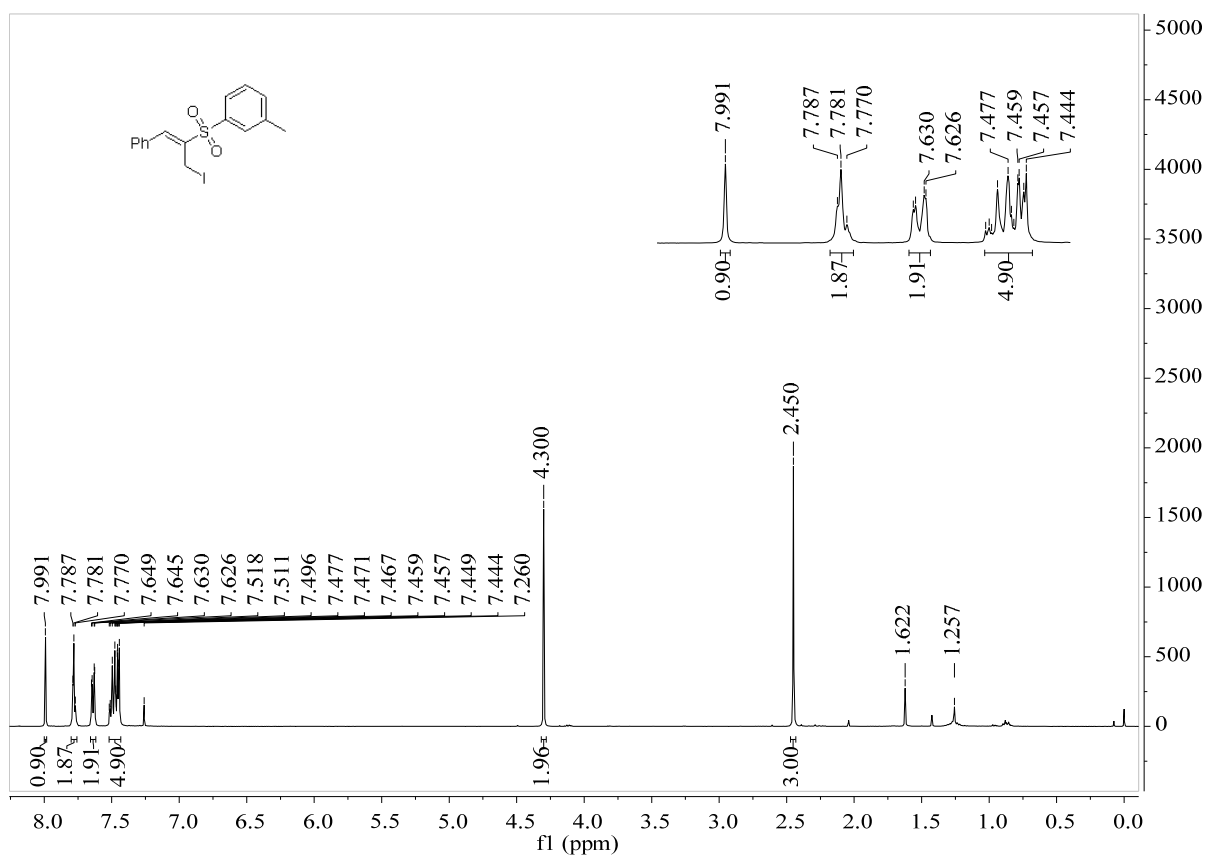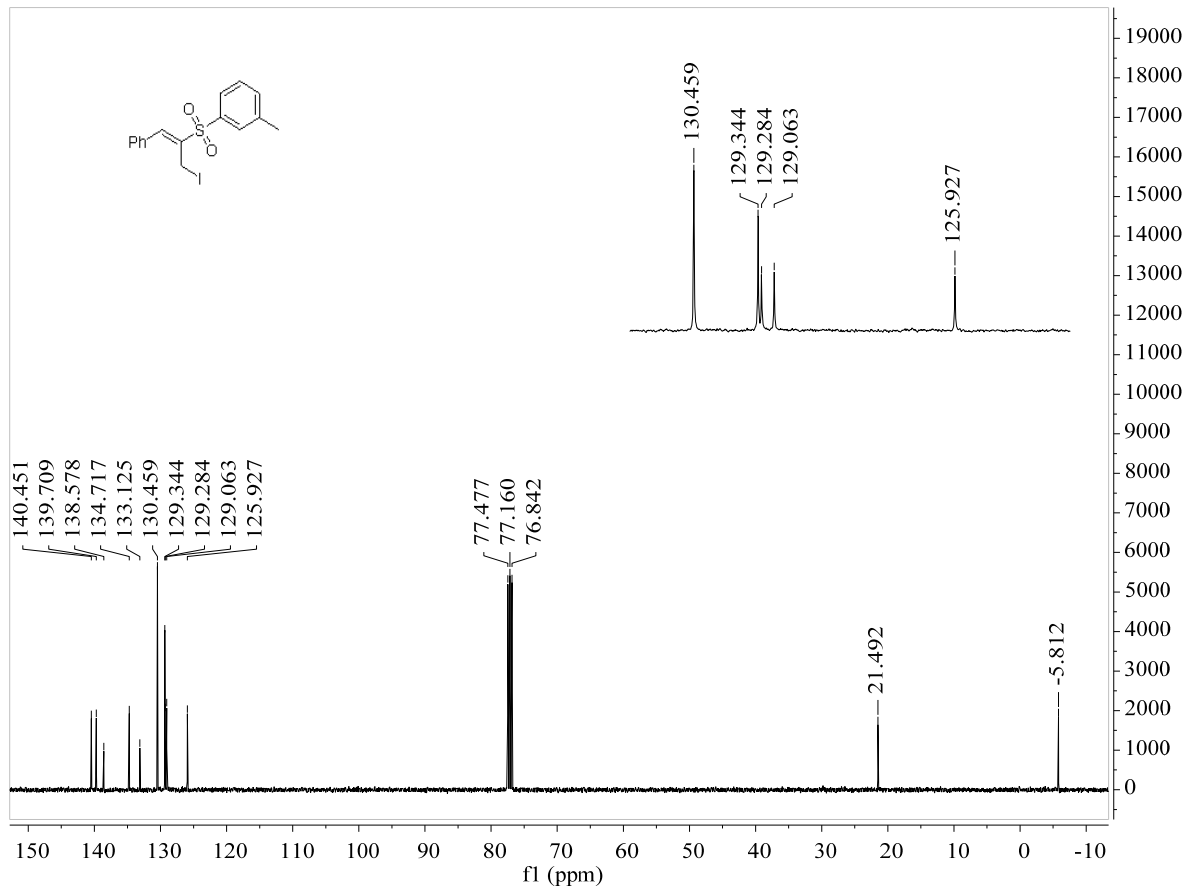

# Compound 3c

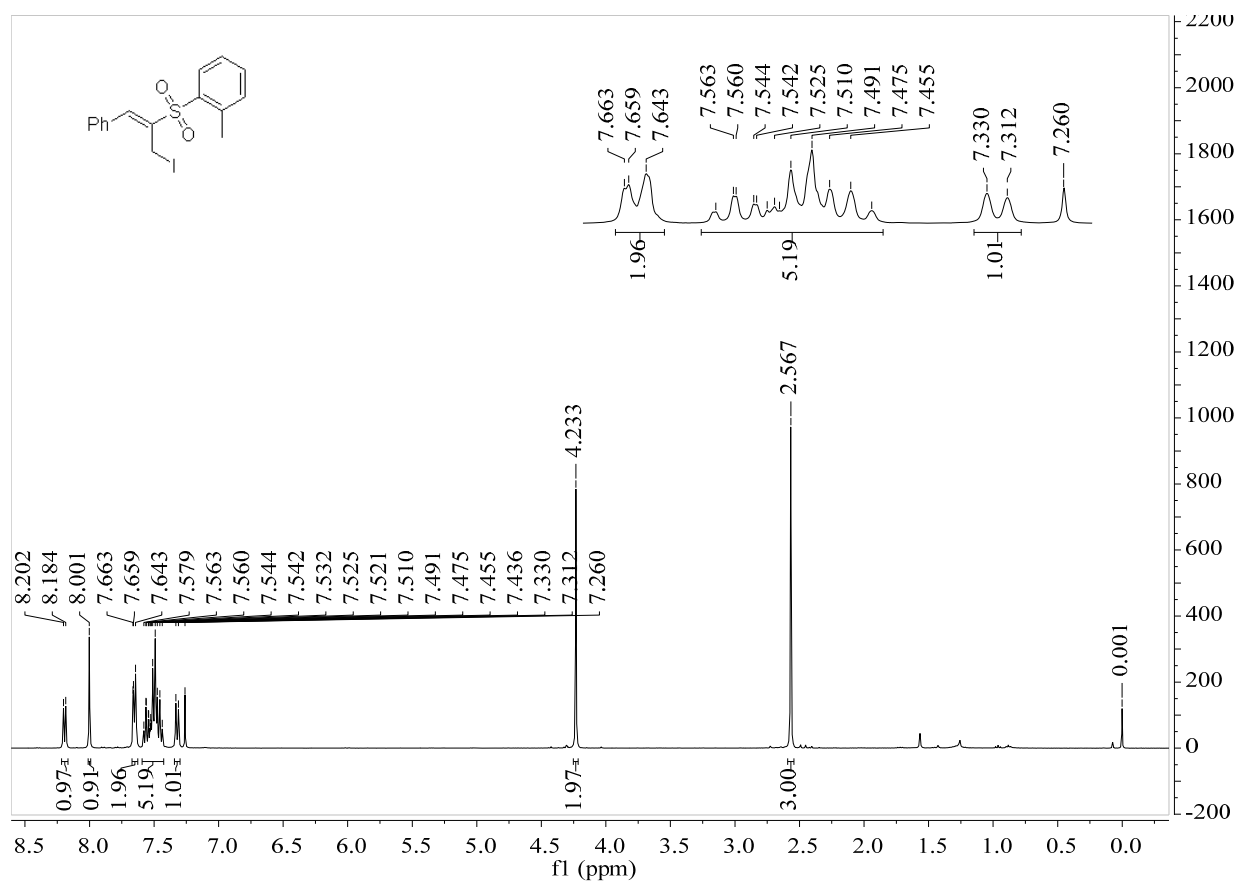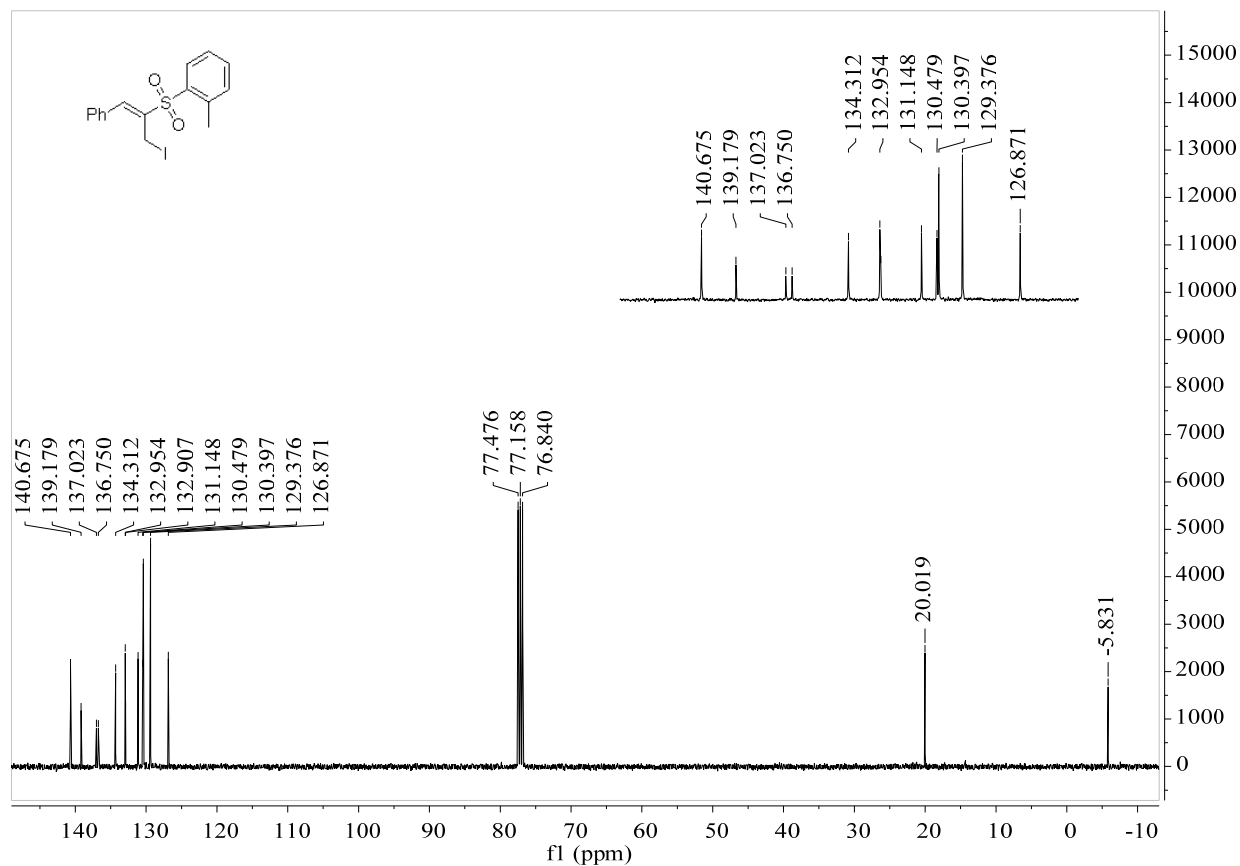

# Compound 3d

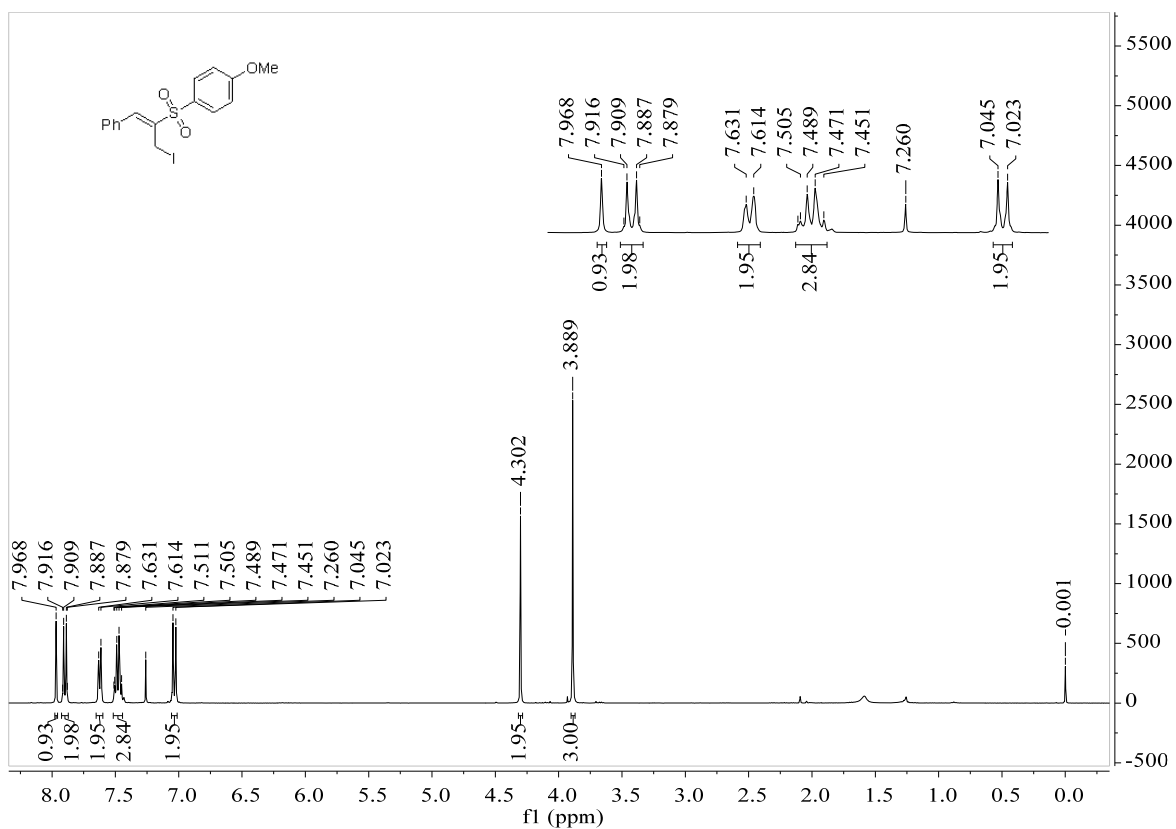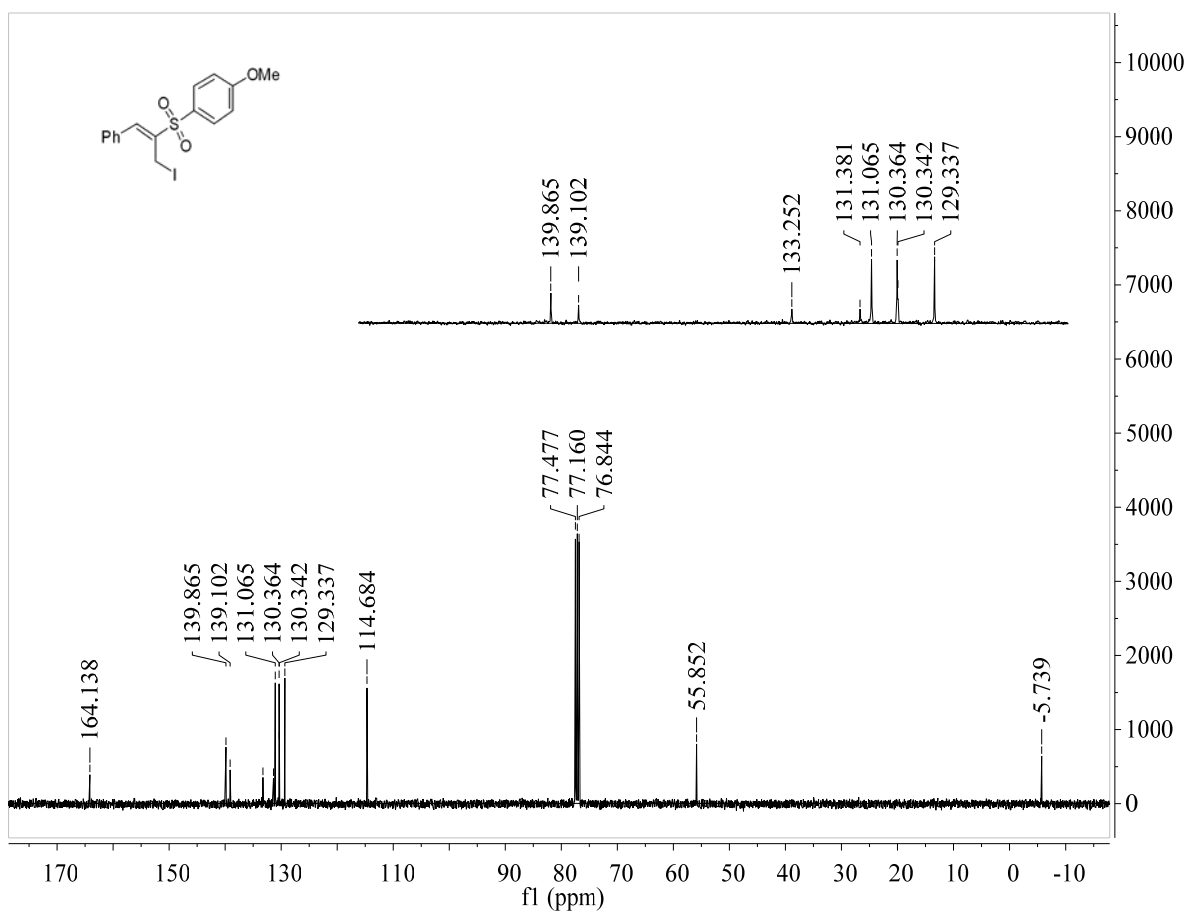

# Compound 3e

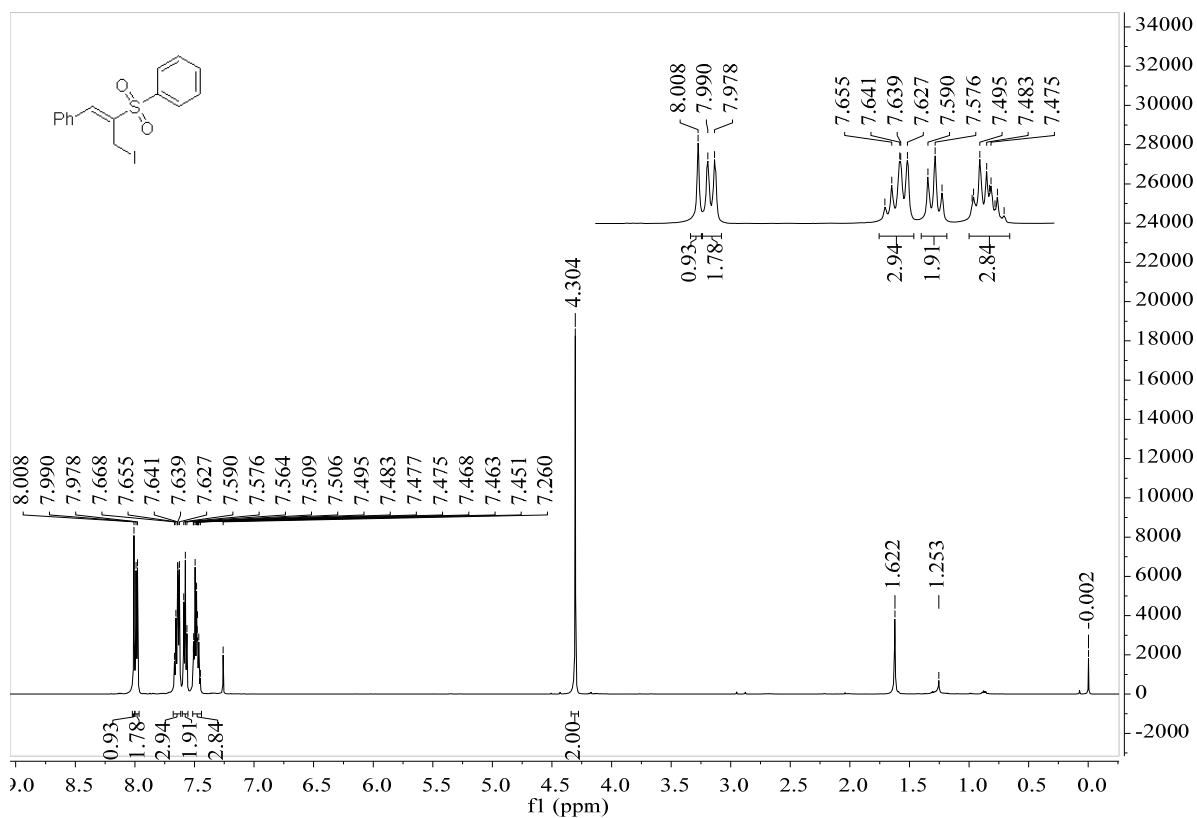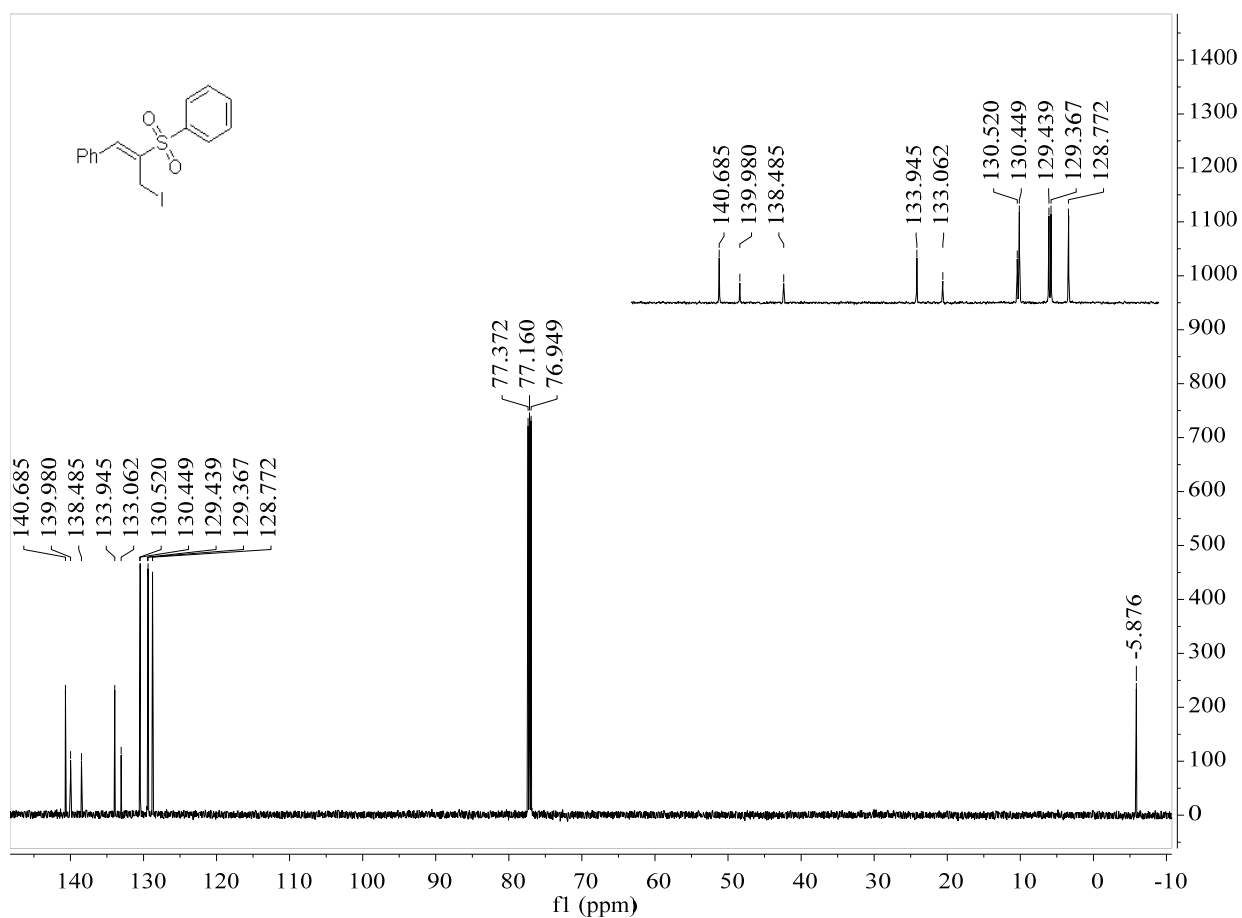

# Compound 3f

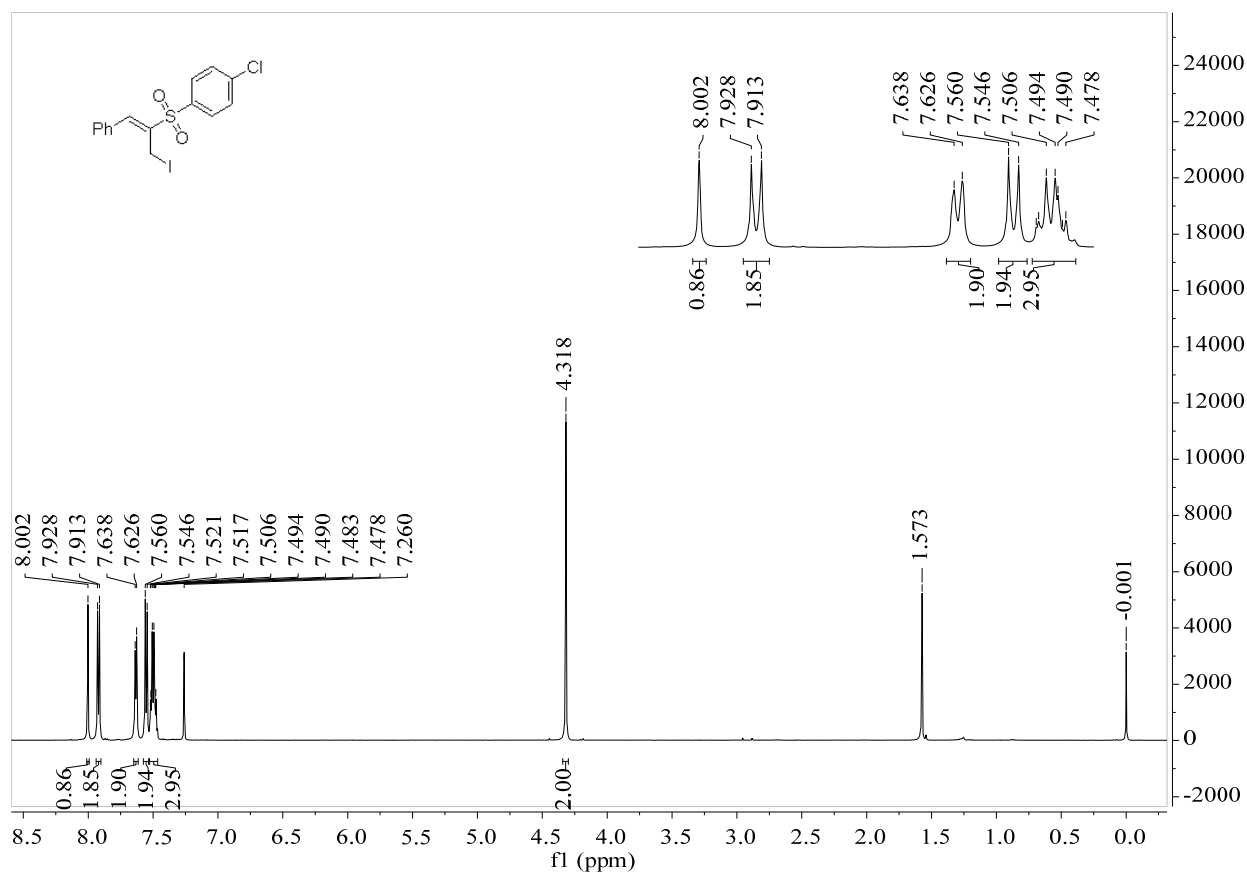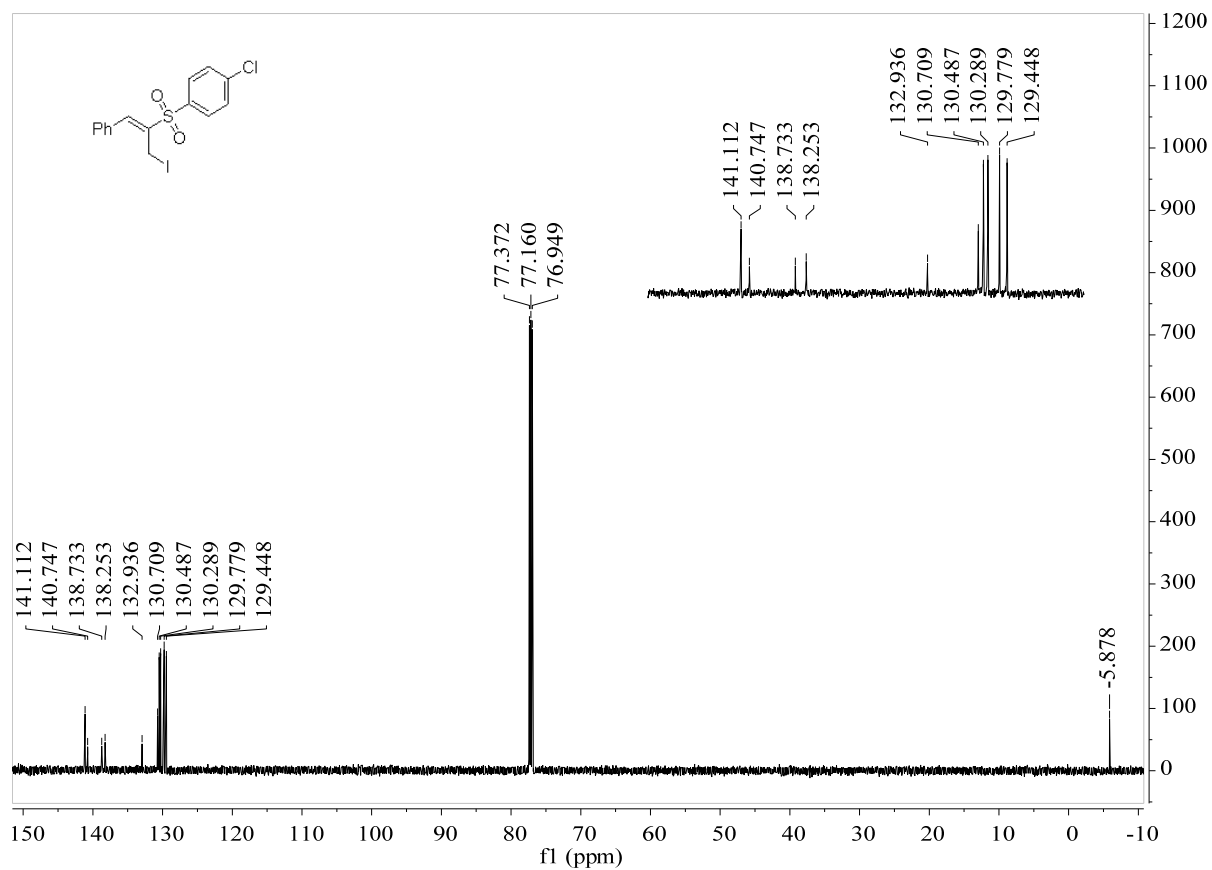

# Compound 3g

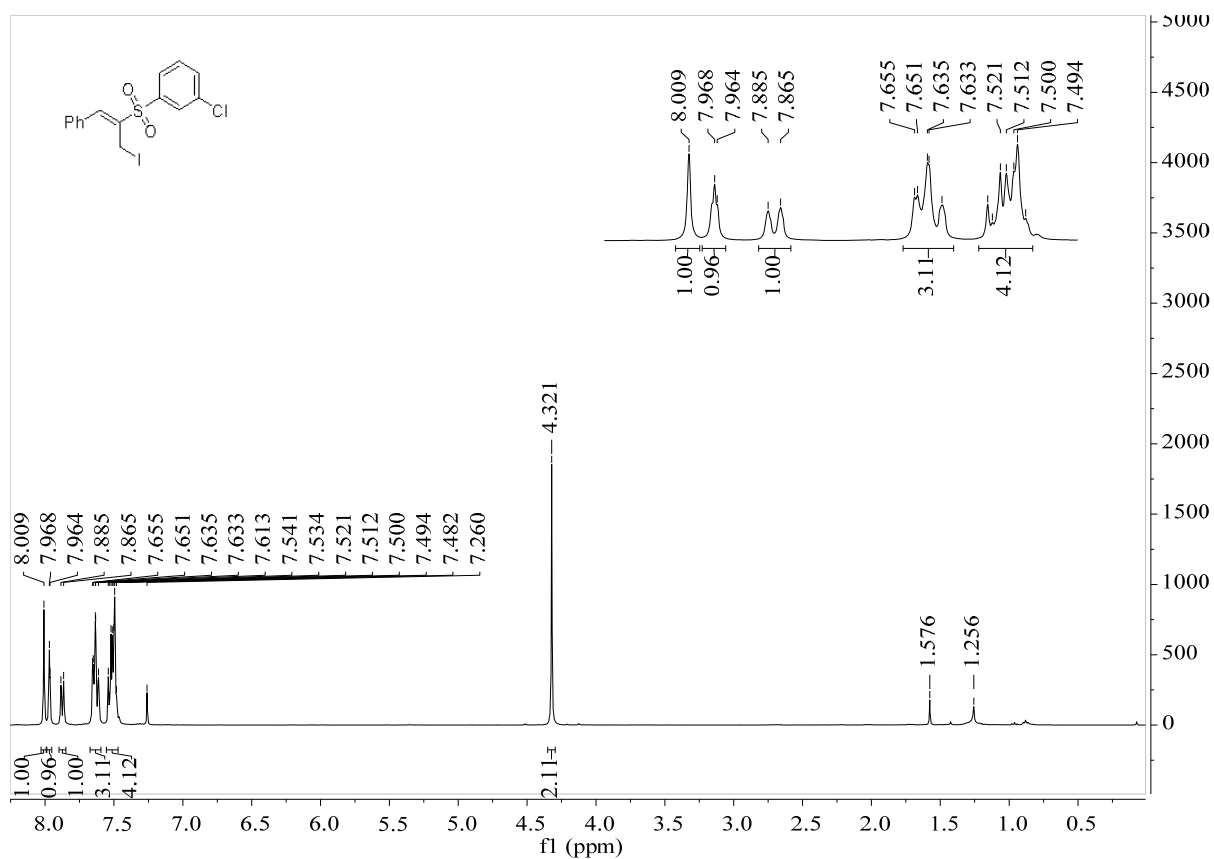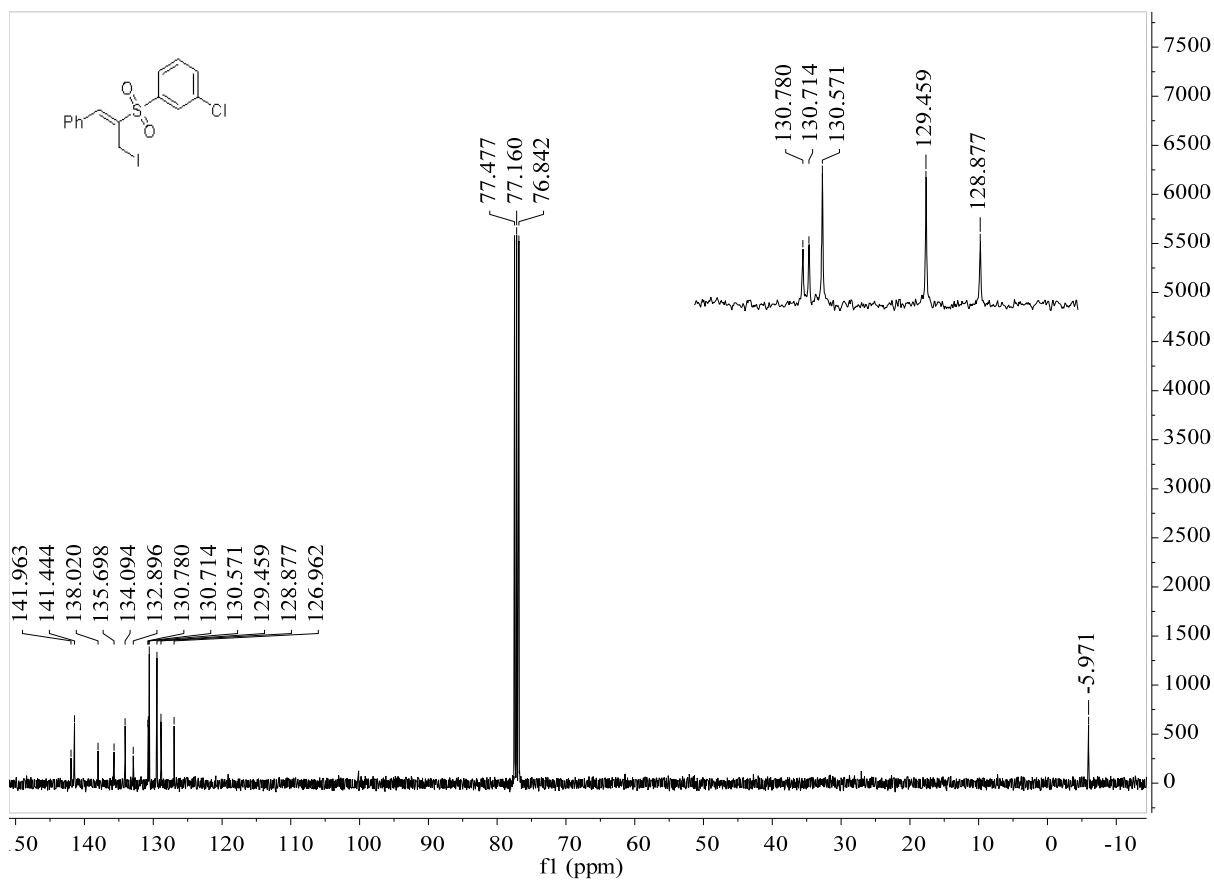

# Compound 3h

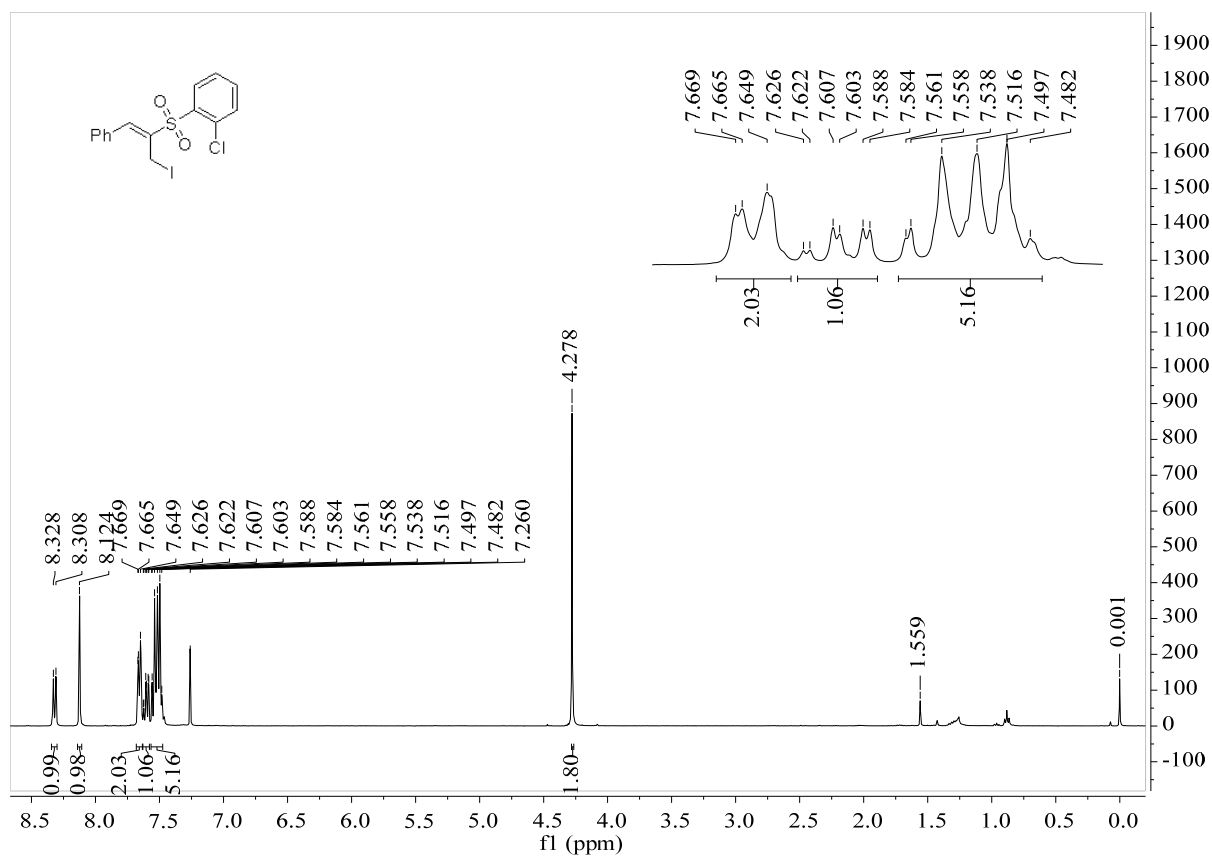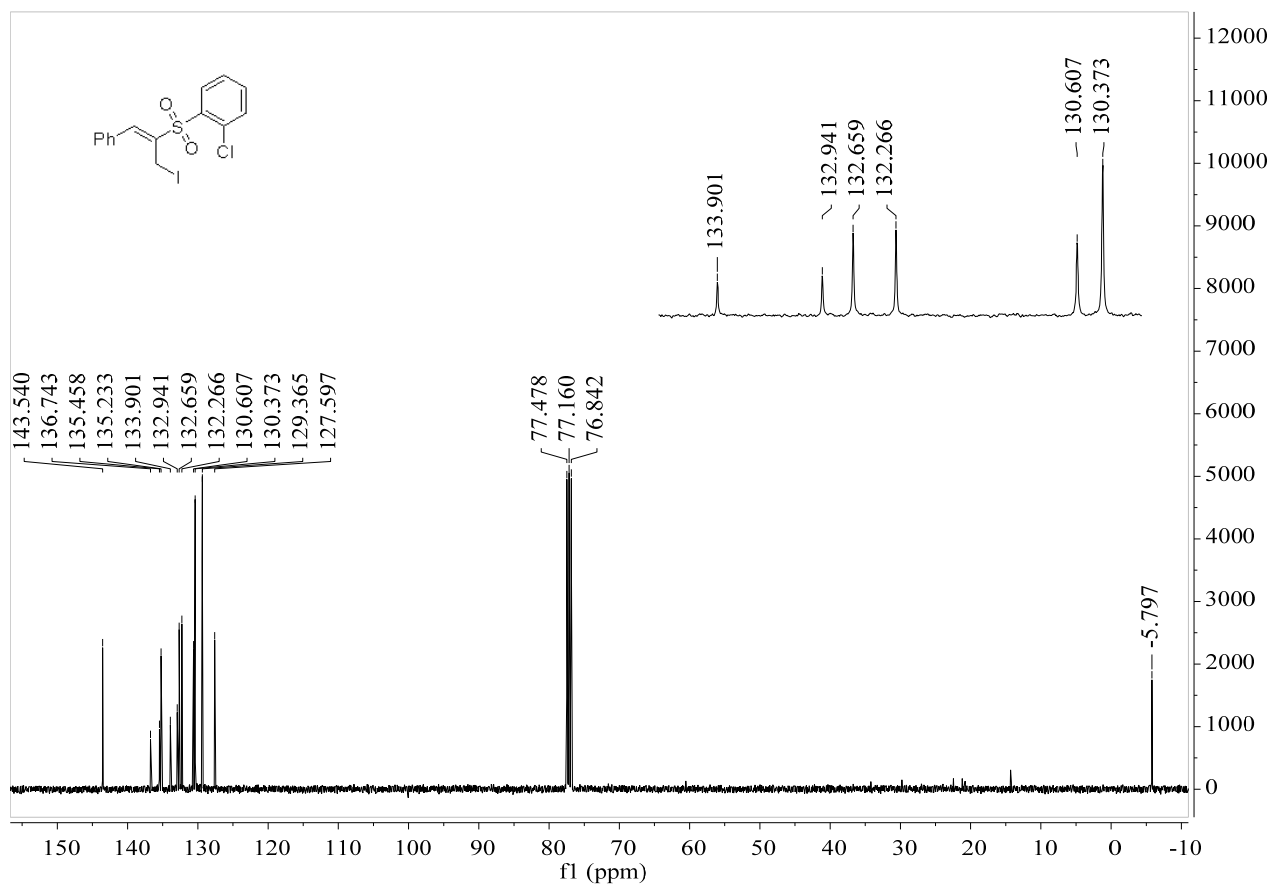

# Compound3i

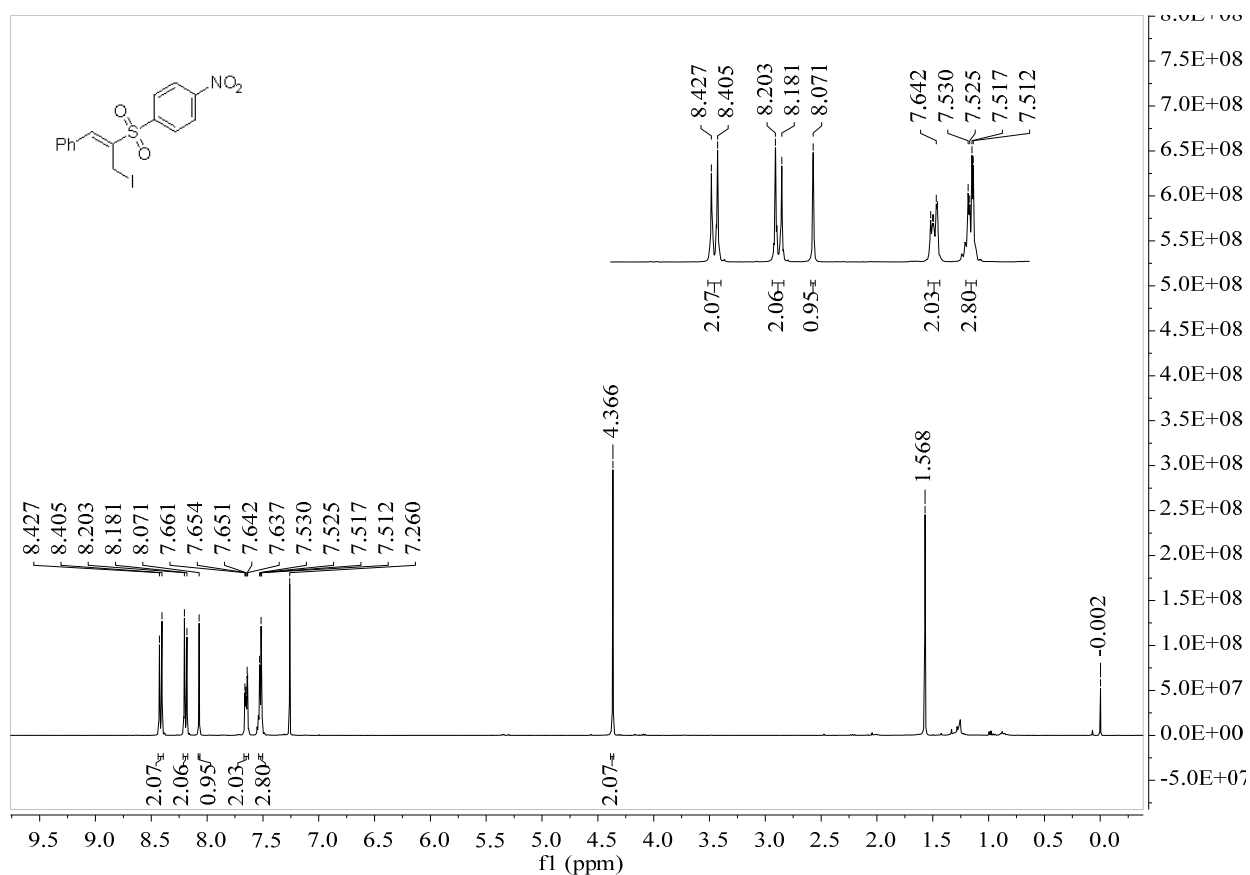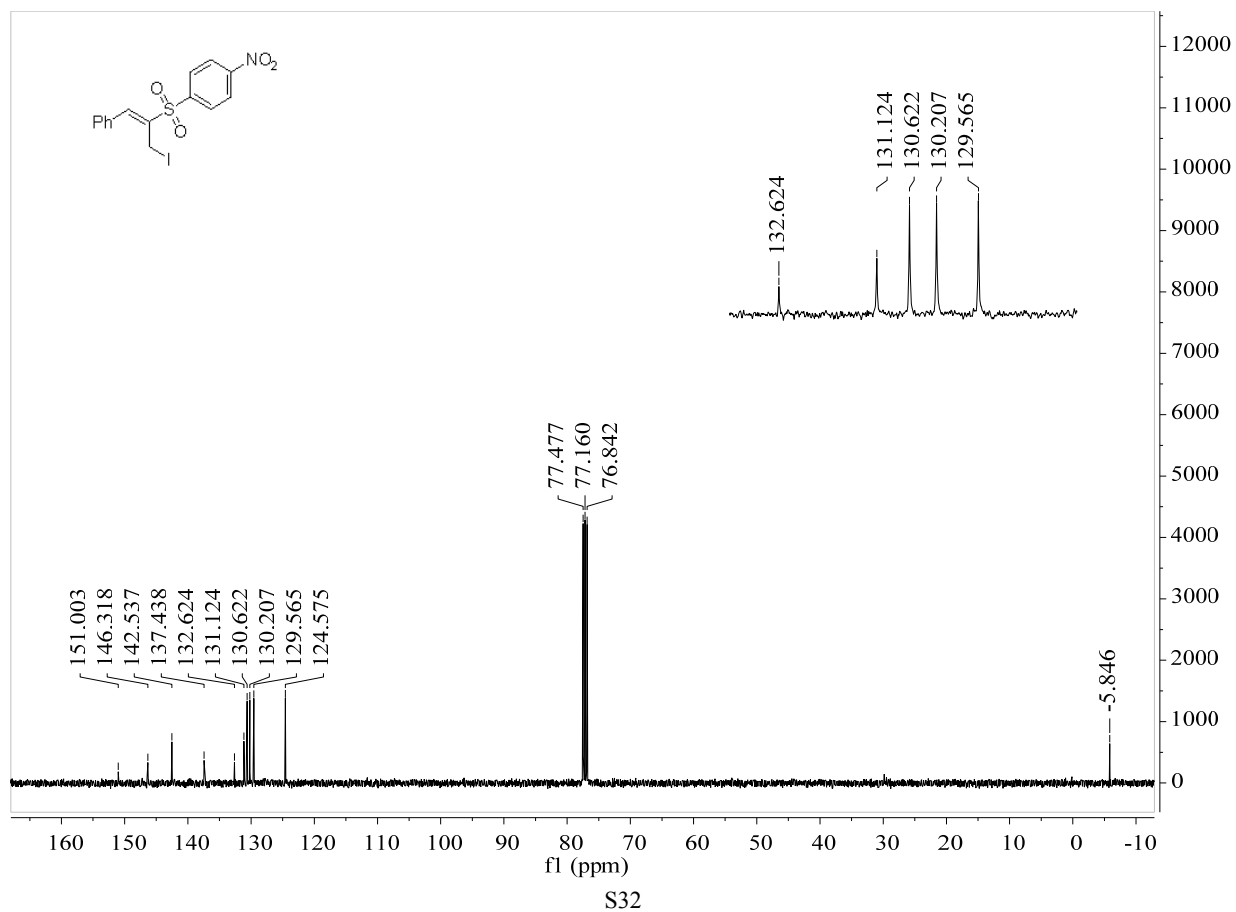



# Compound 3j

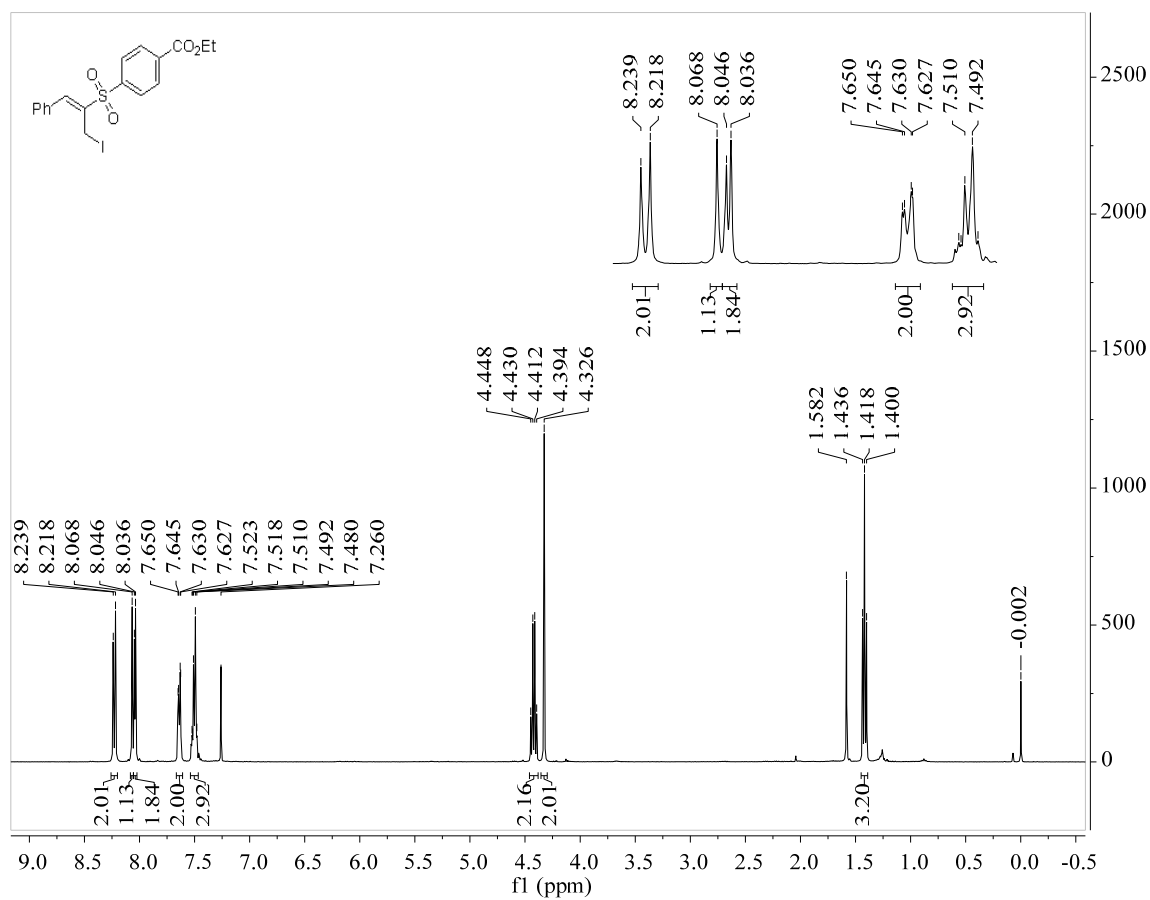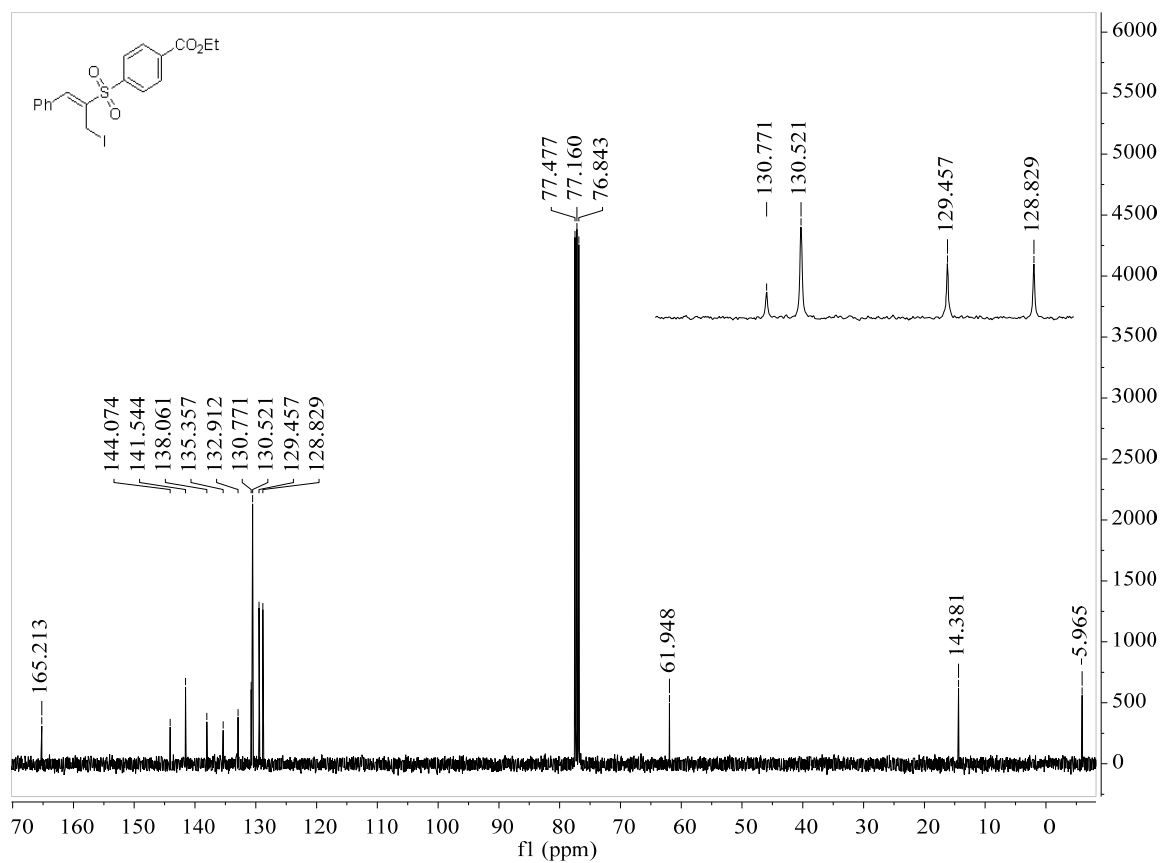

# Compound 3k

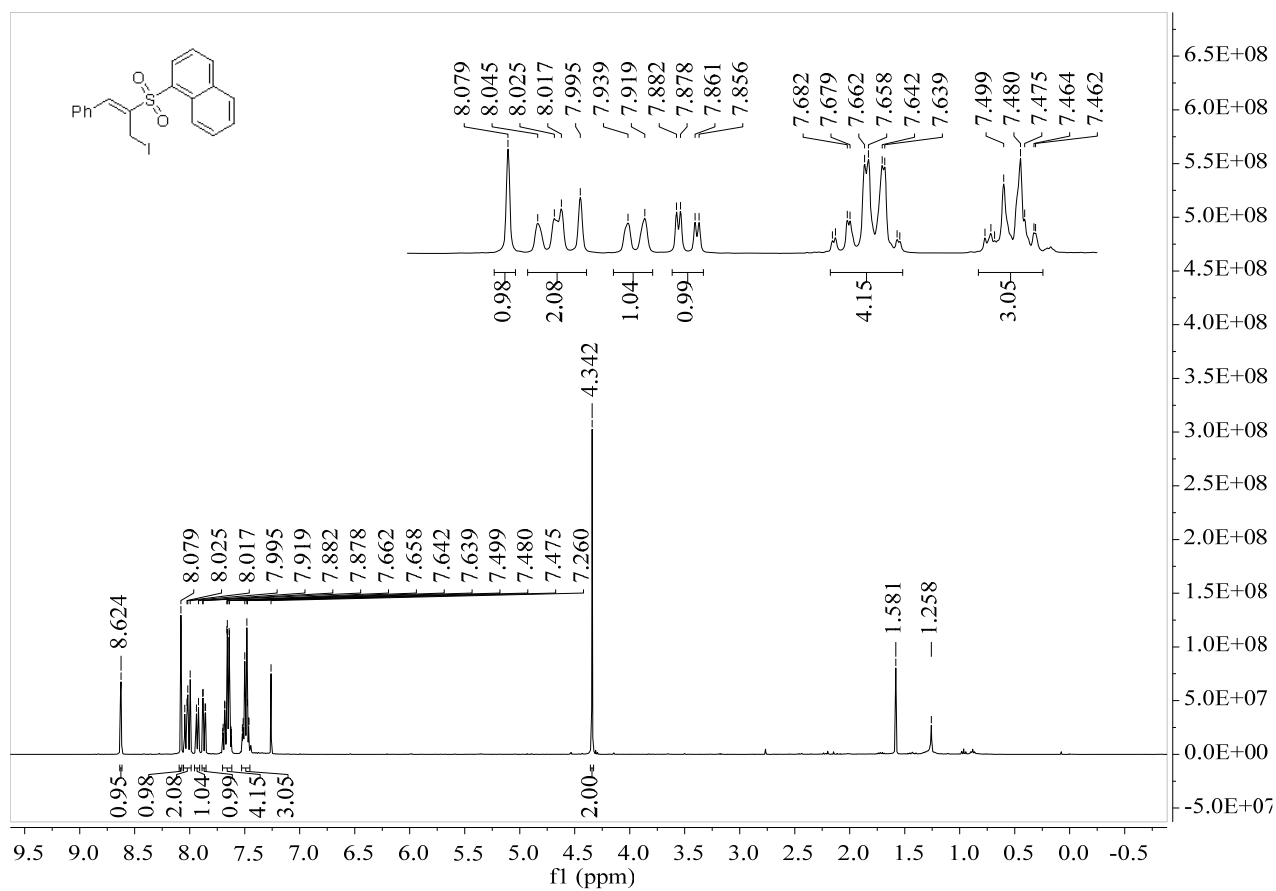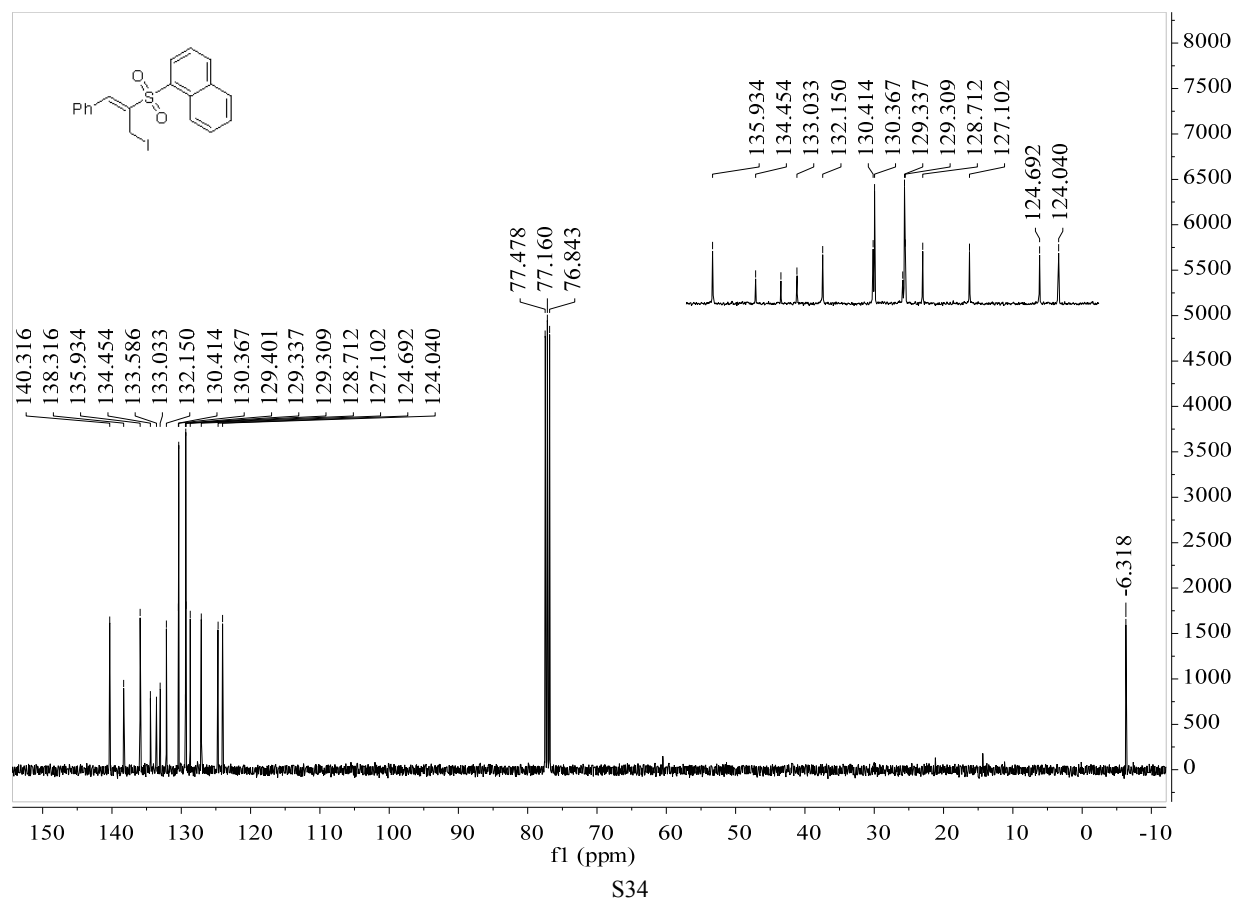

# Compound 31

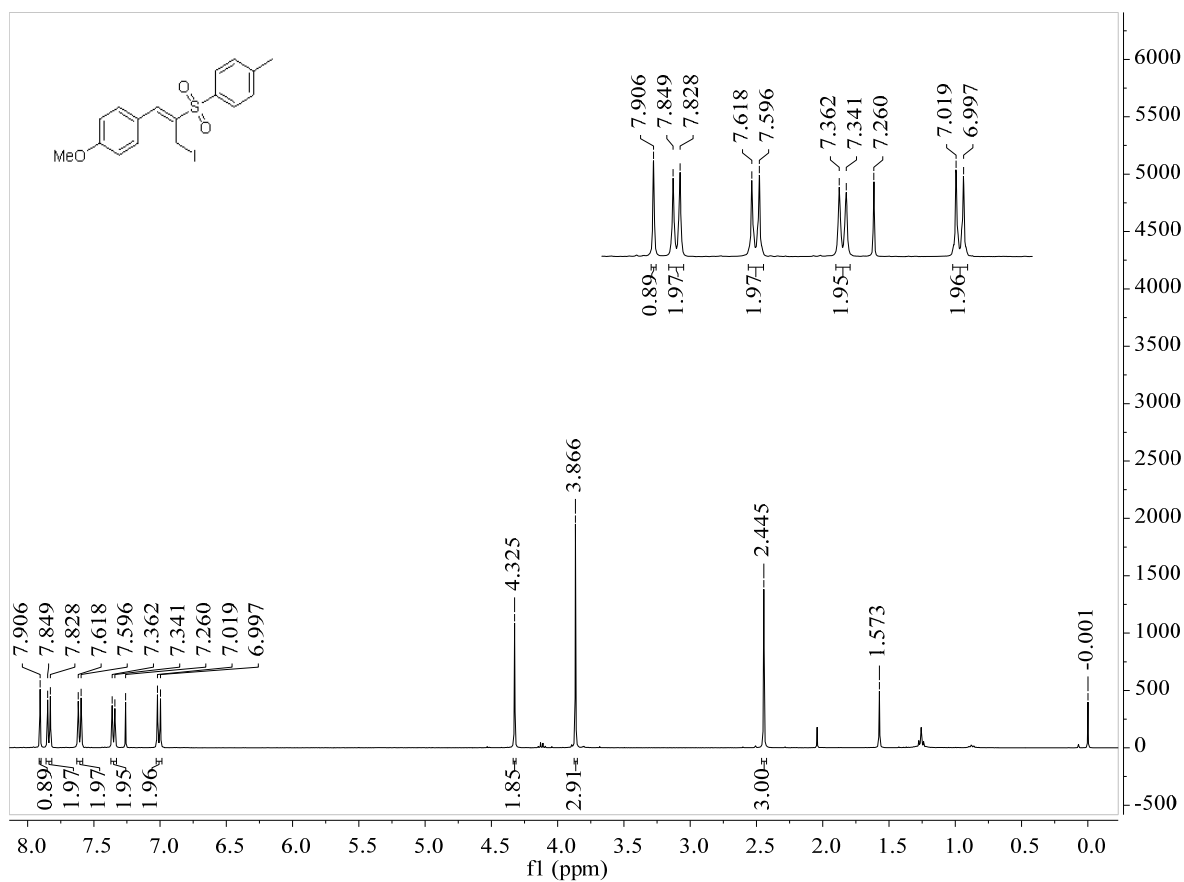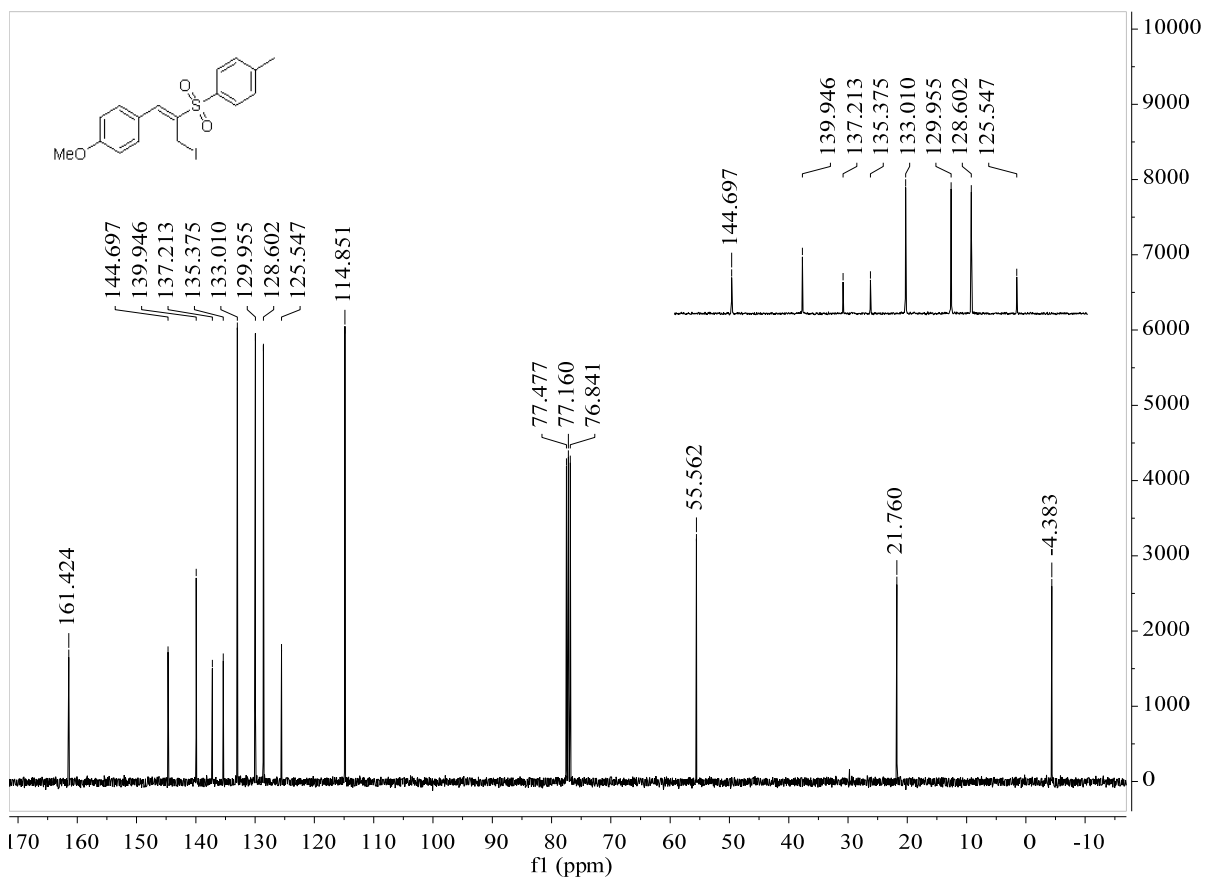

# Compound 3m

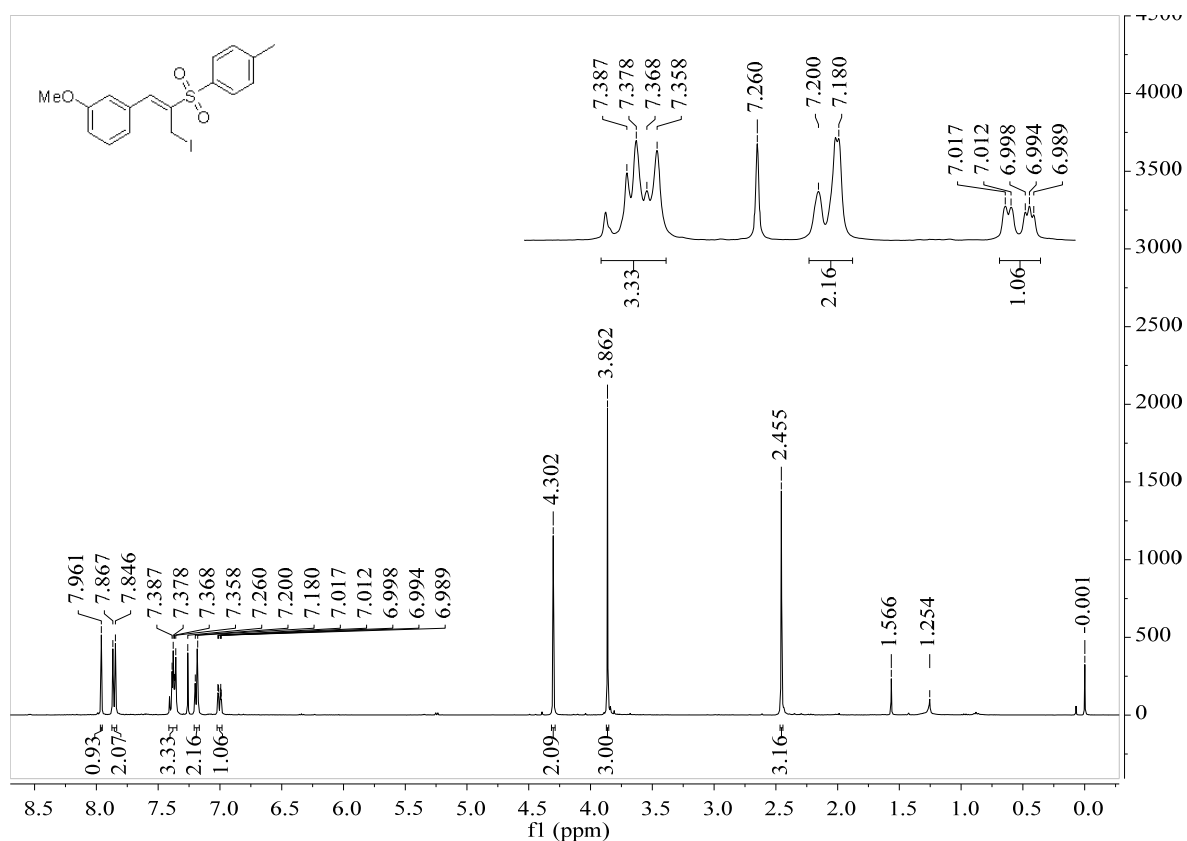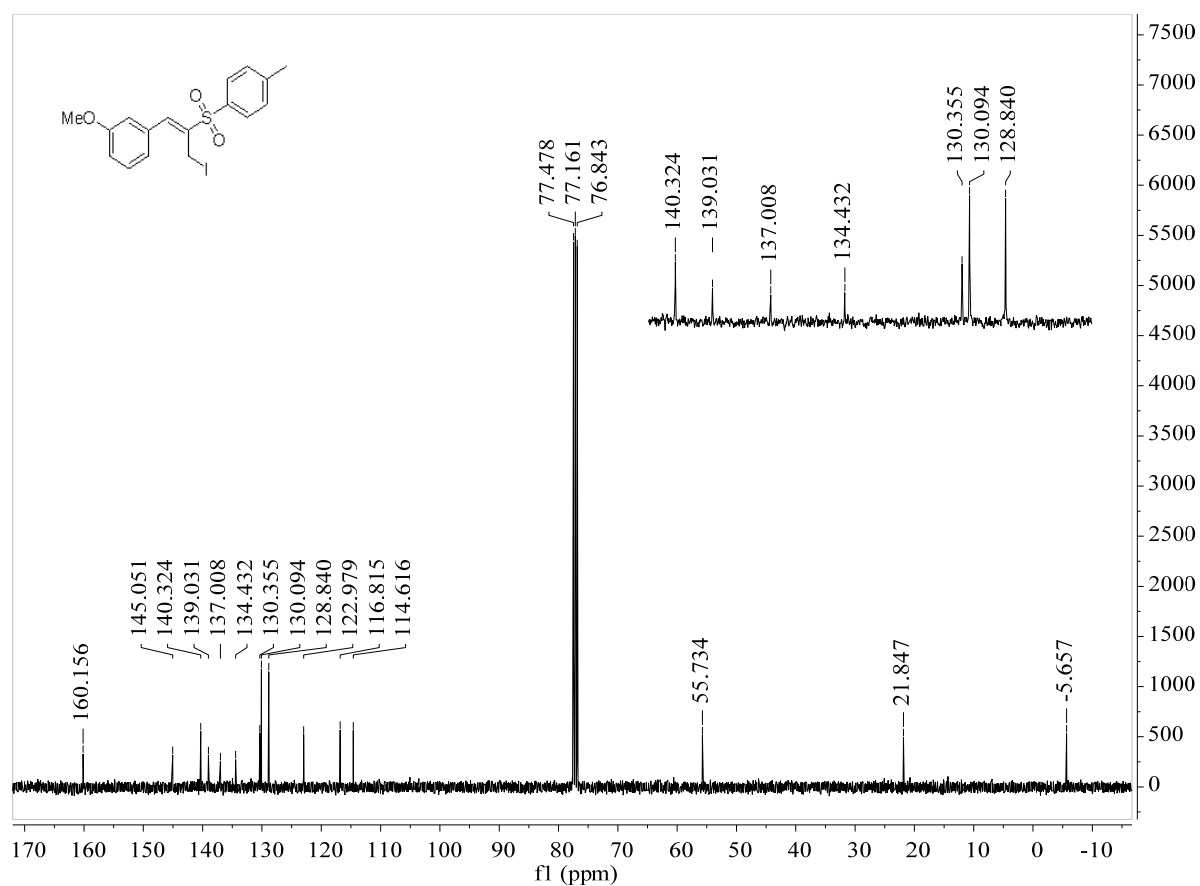

# Compound 3n

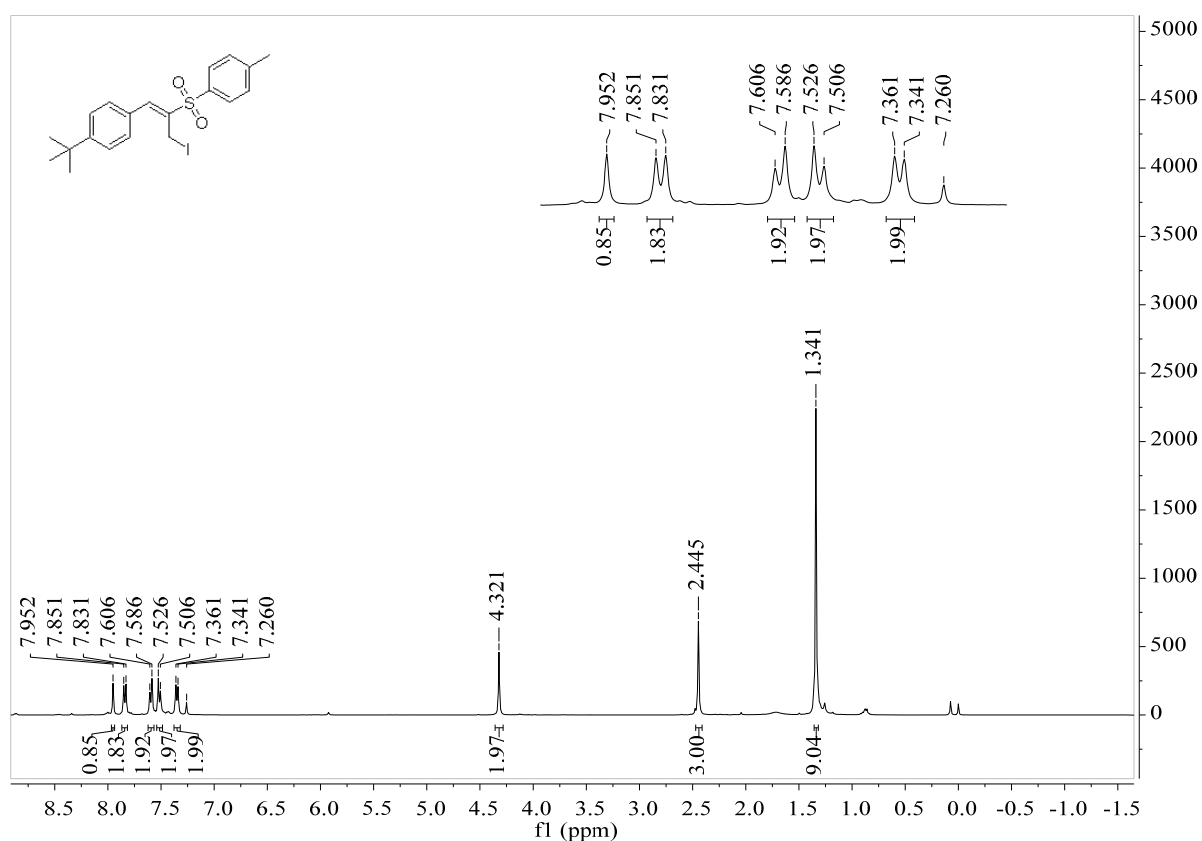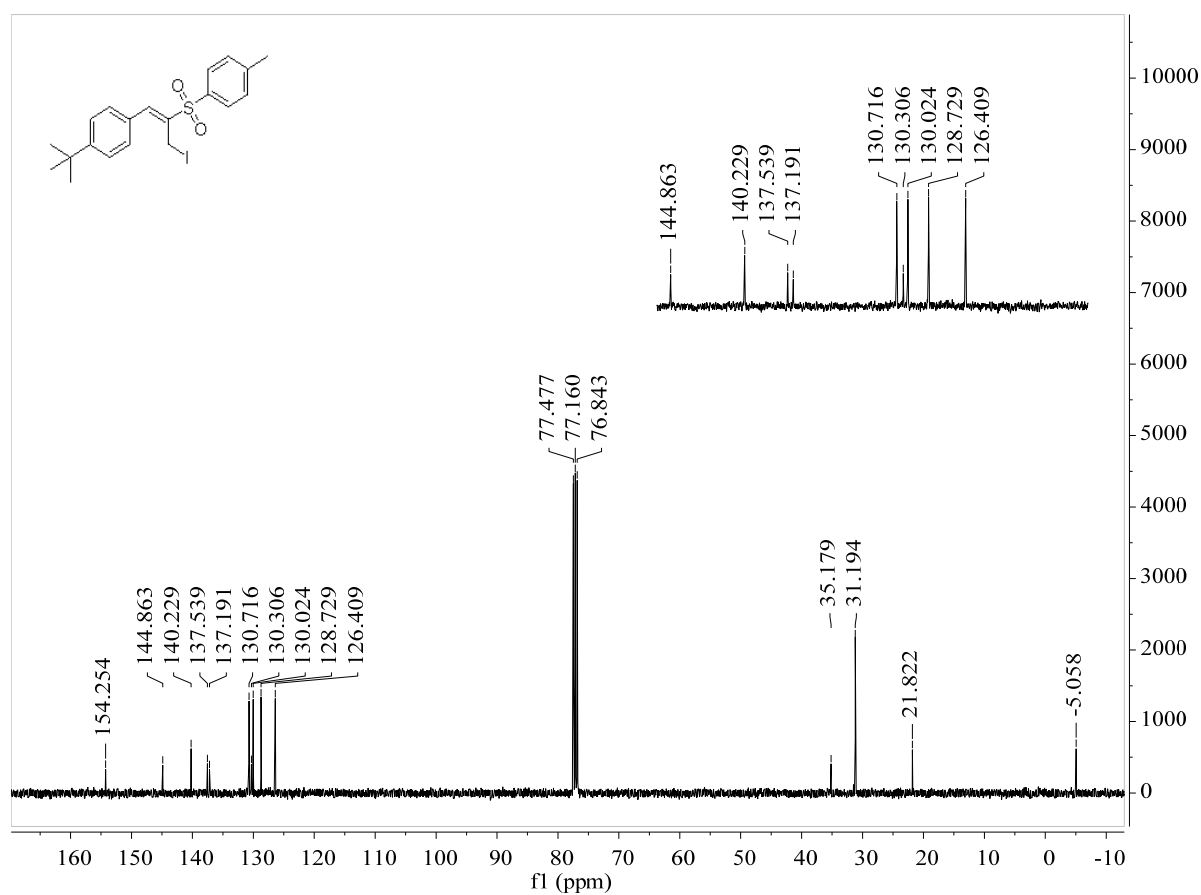

# Compound 3o

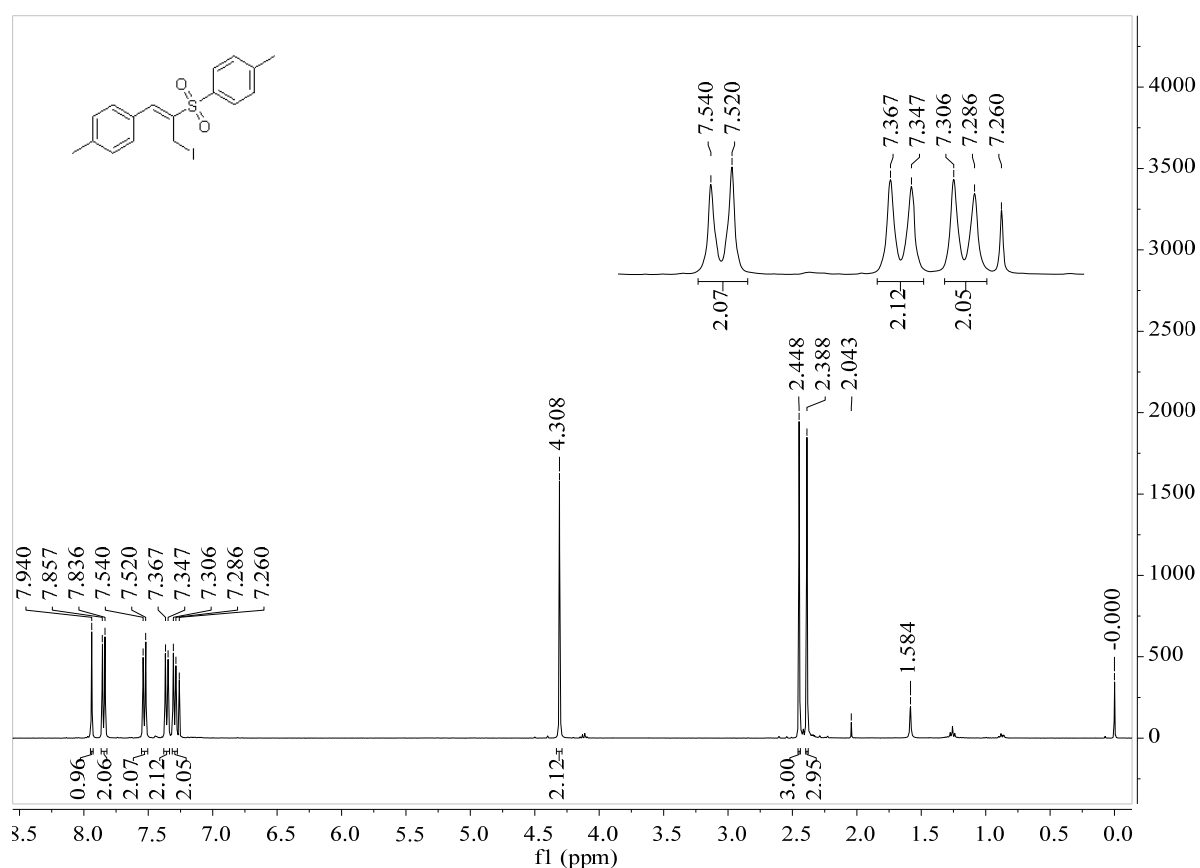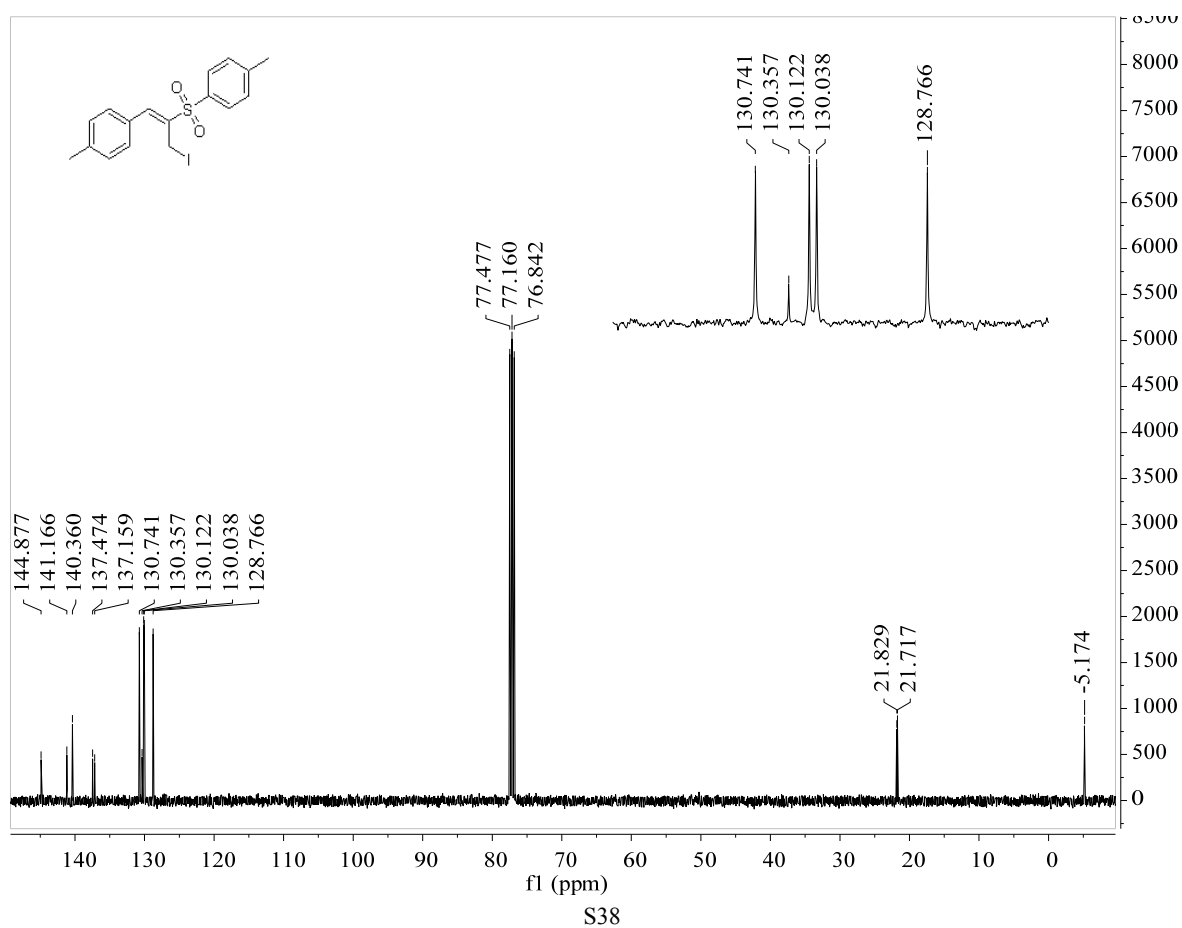

# Compound3p

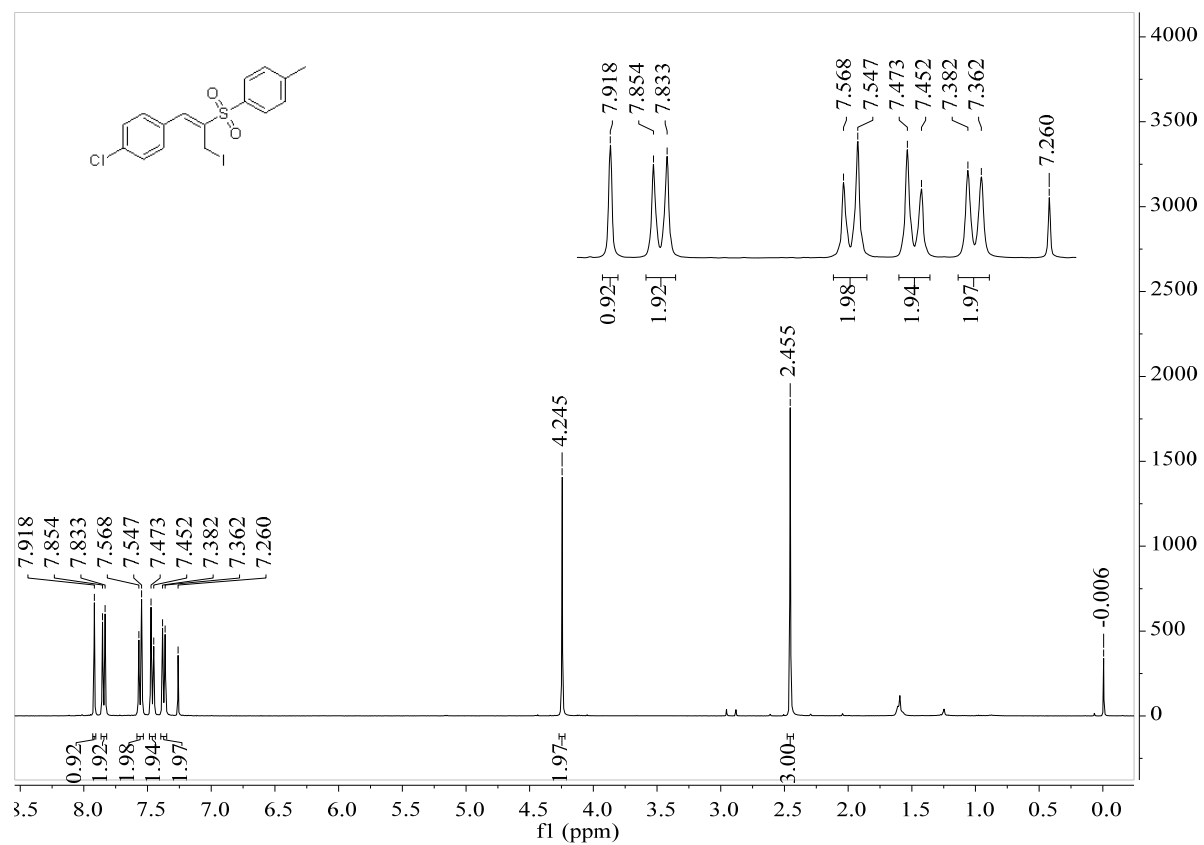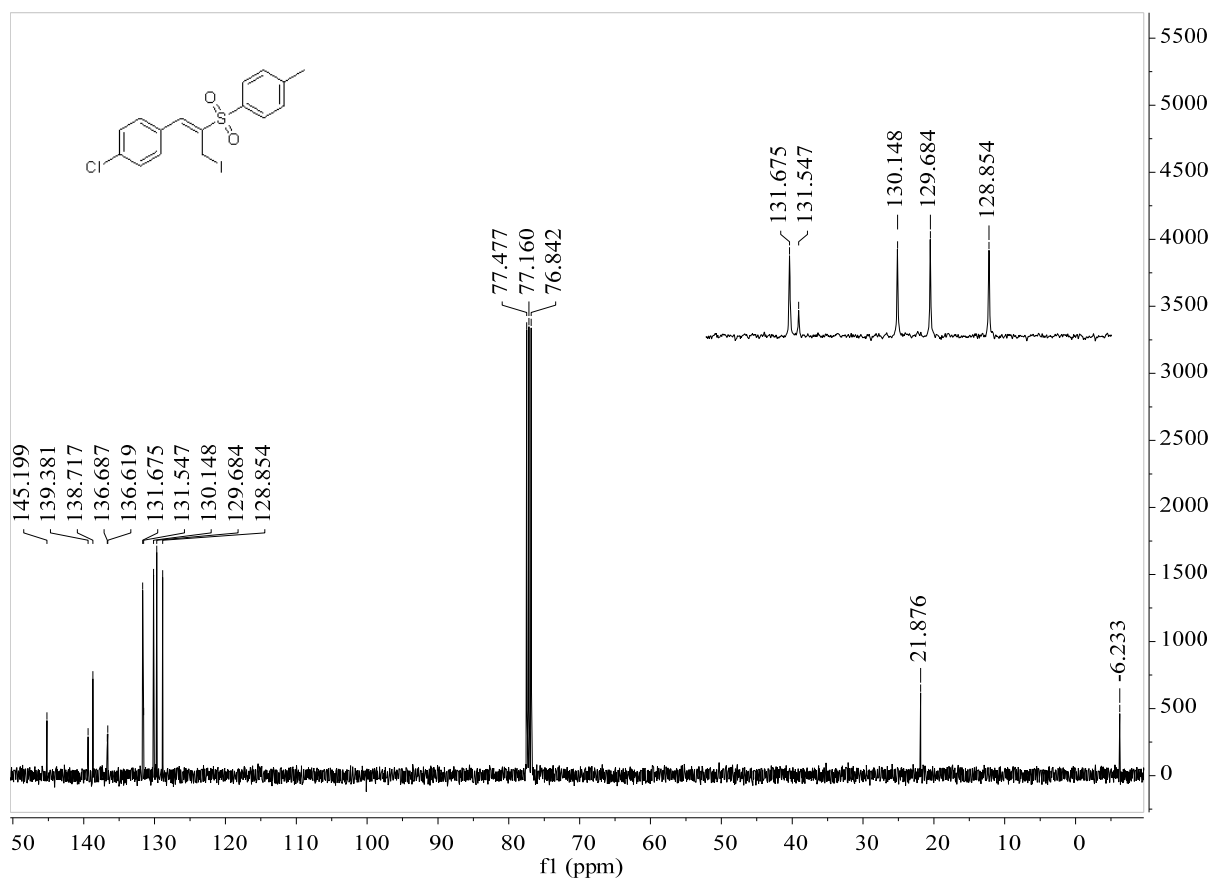

# Compound 3q

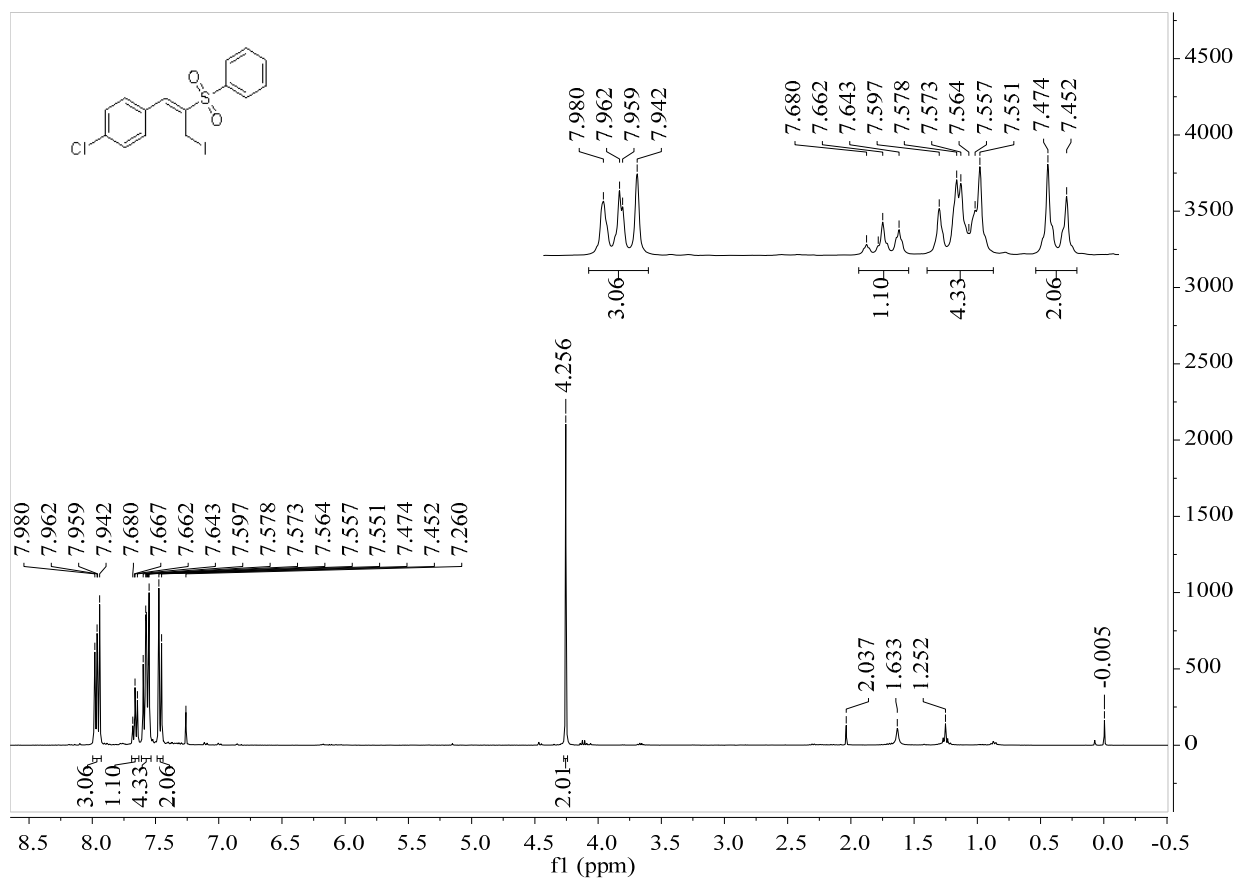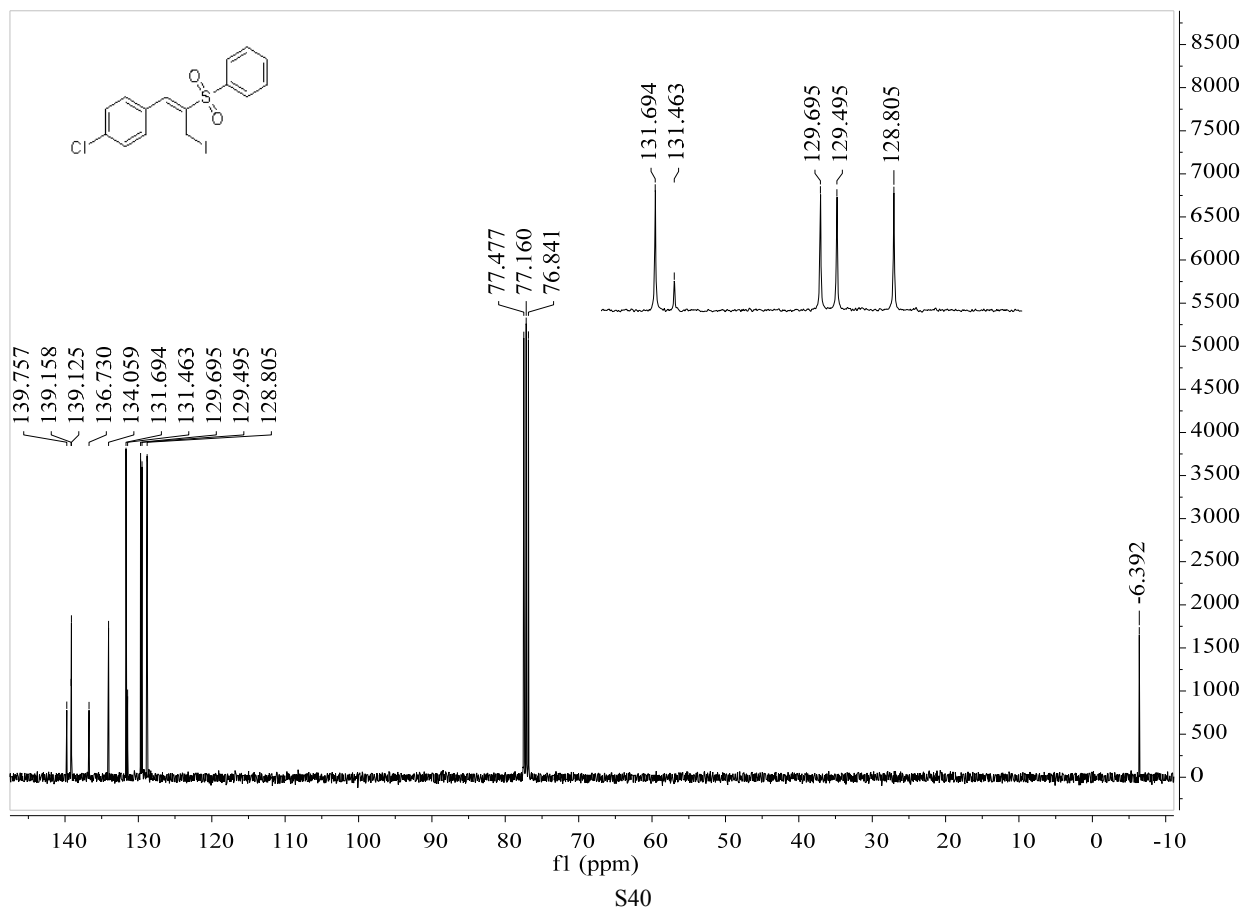



# Compound 3r

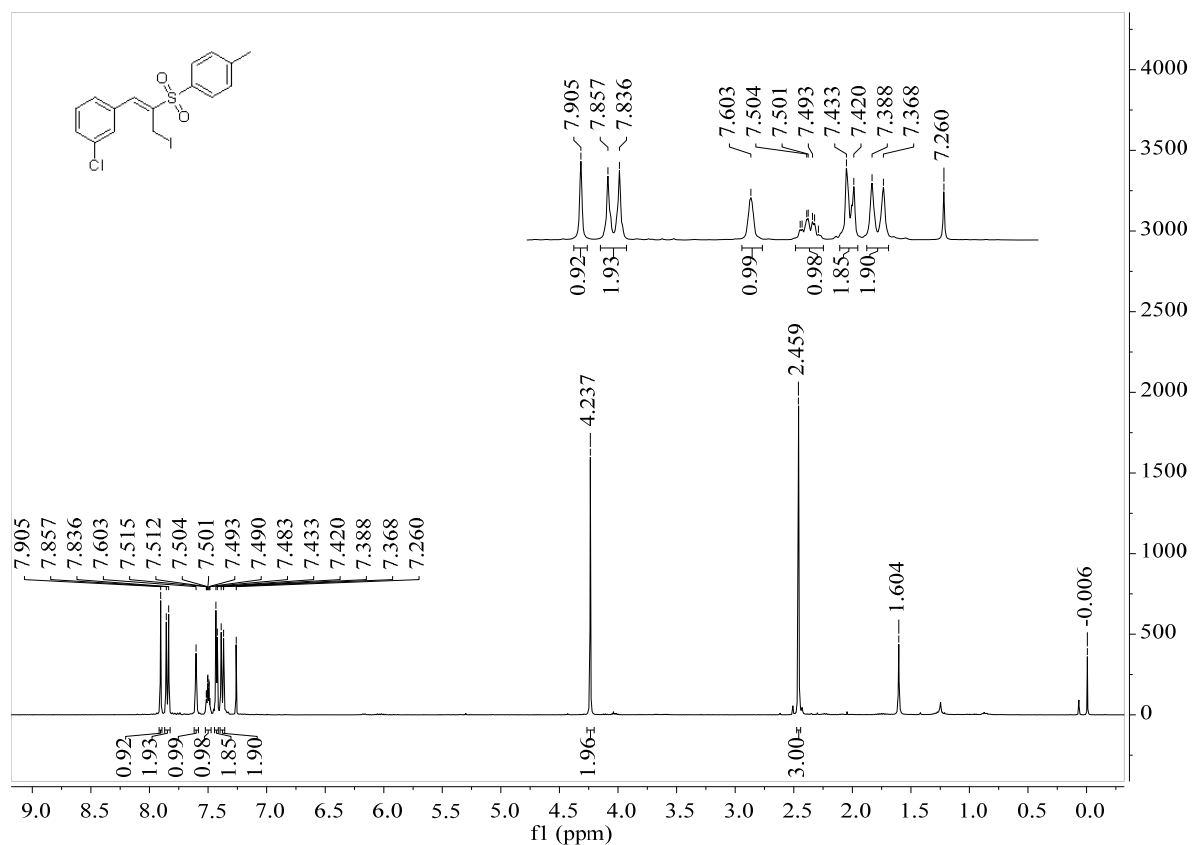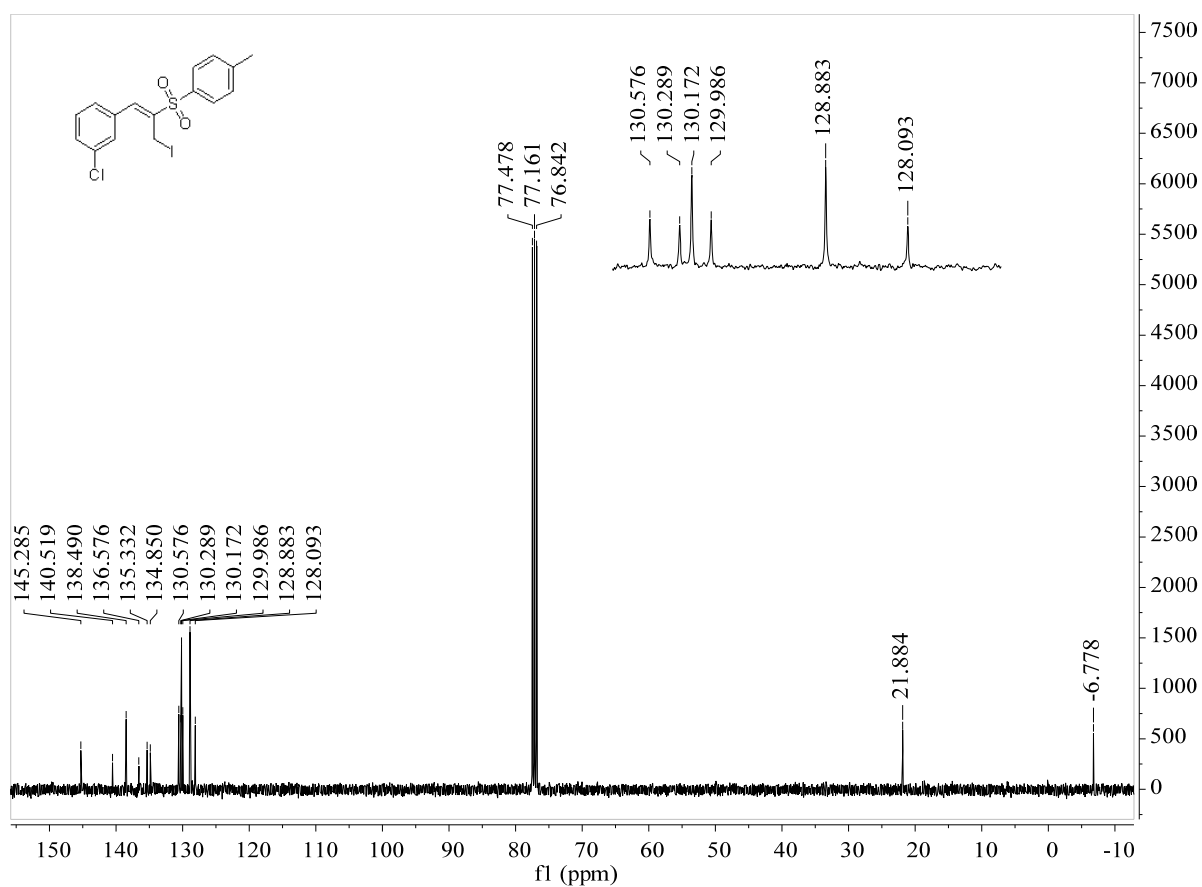

# Compound 3s

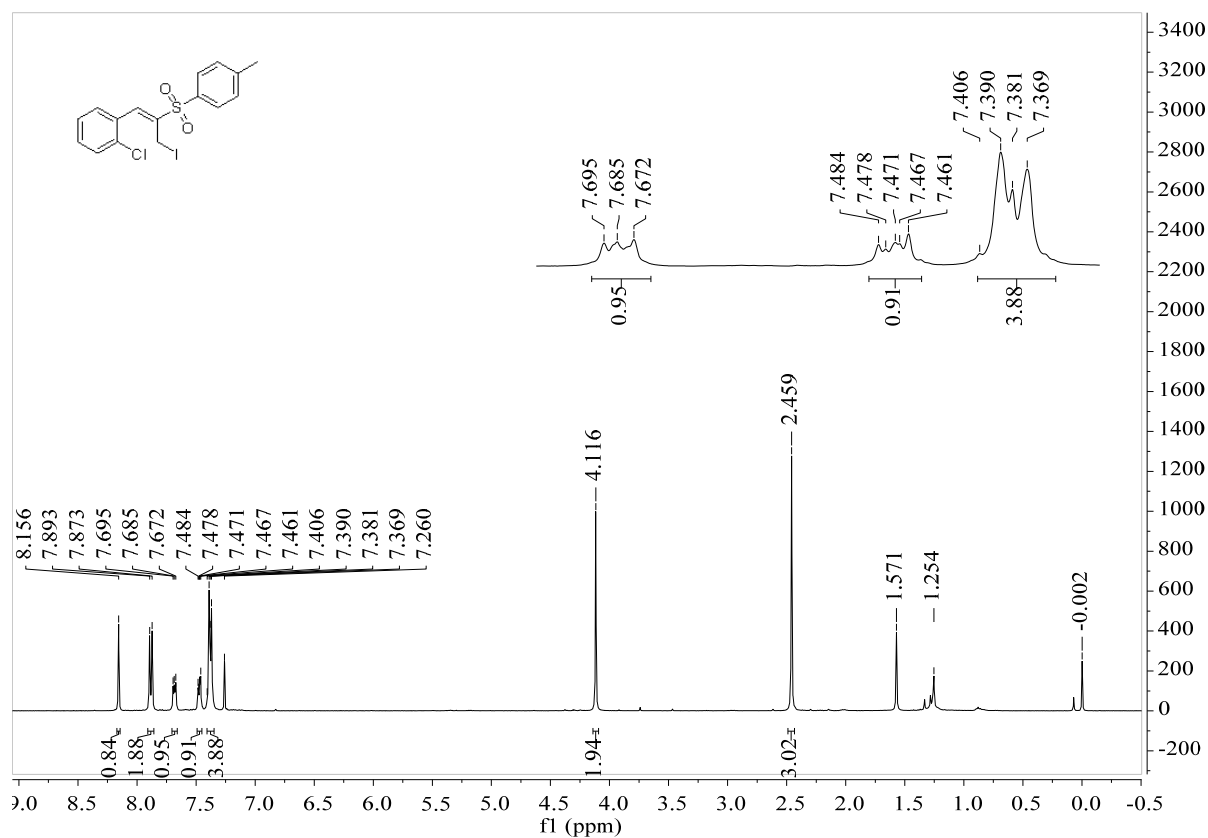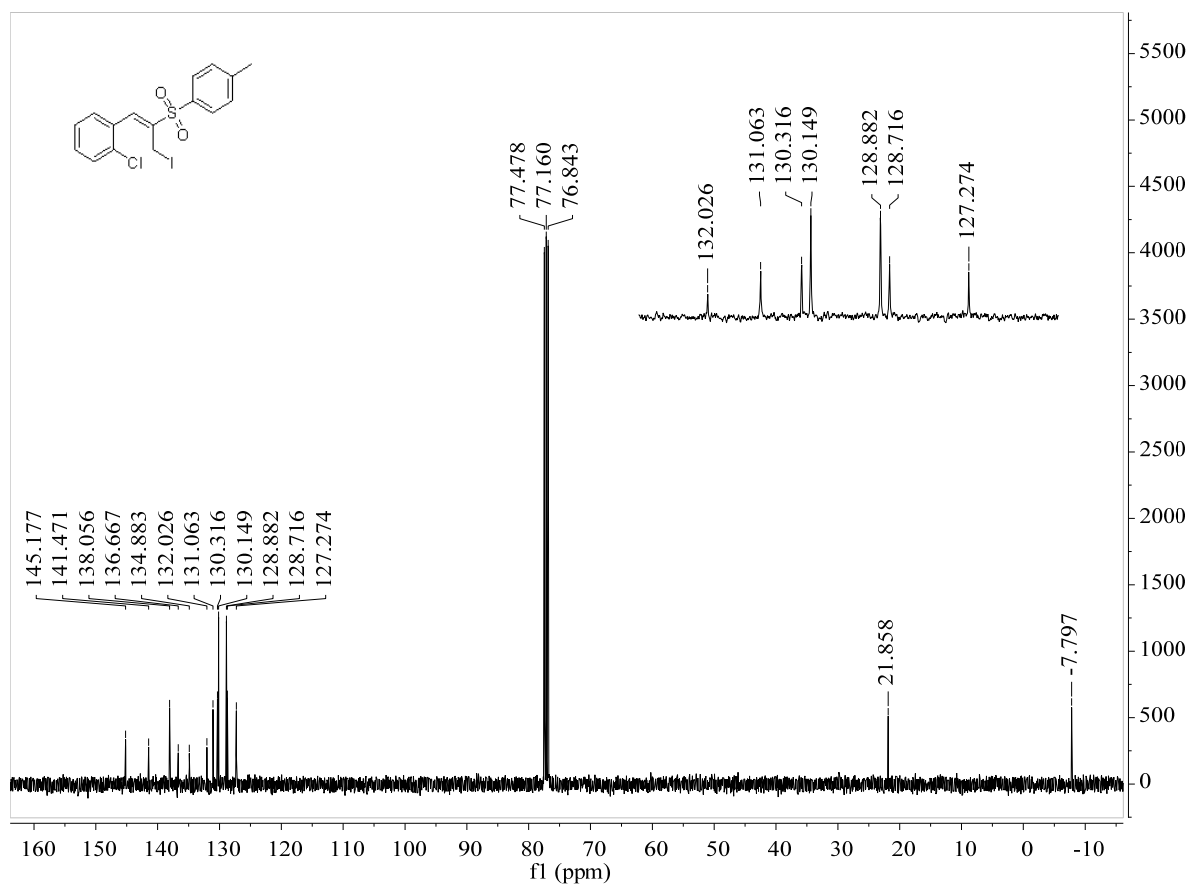

# Compound 3t

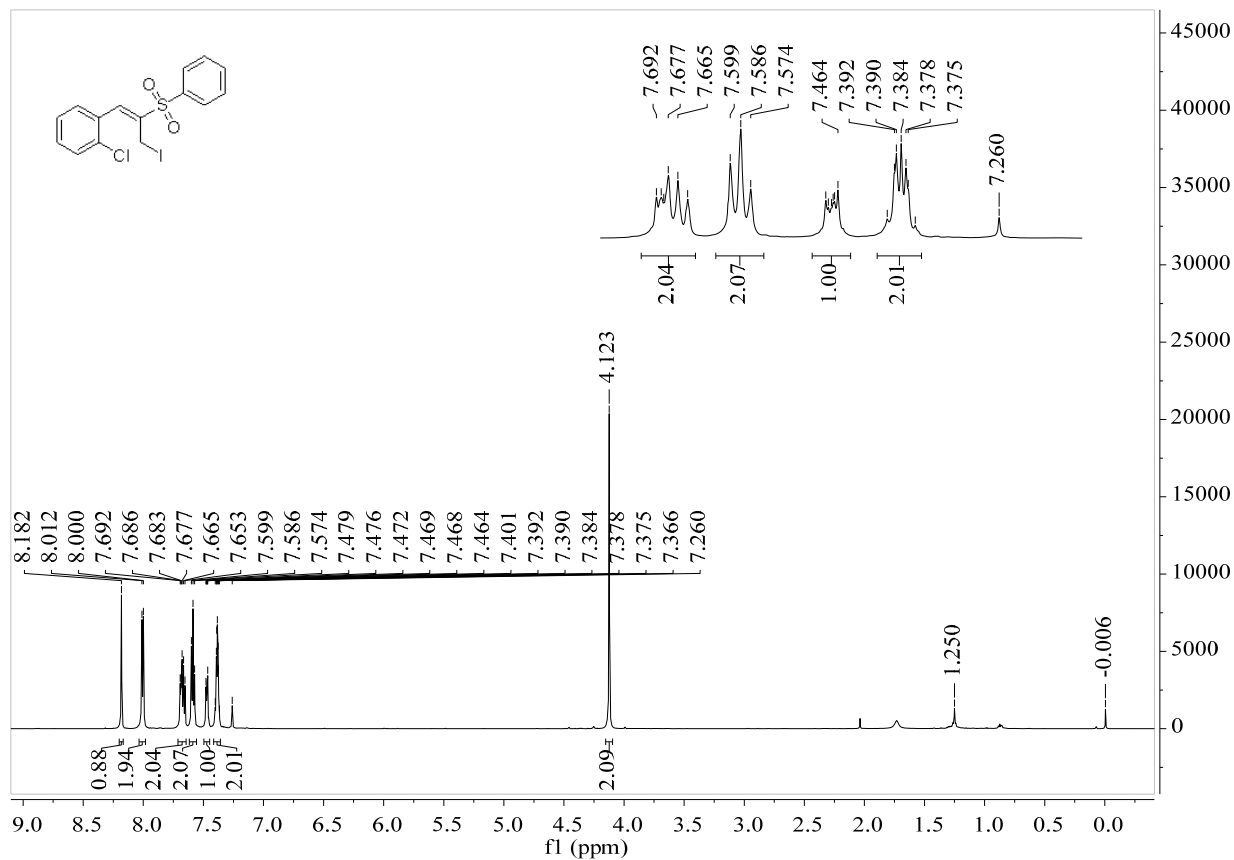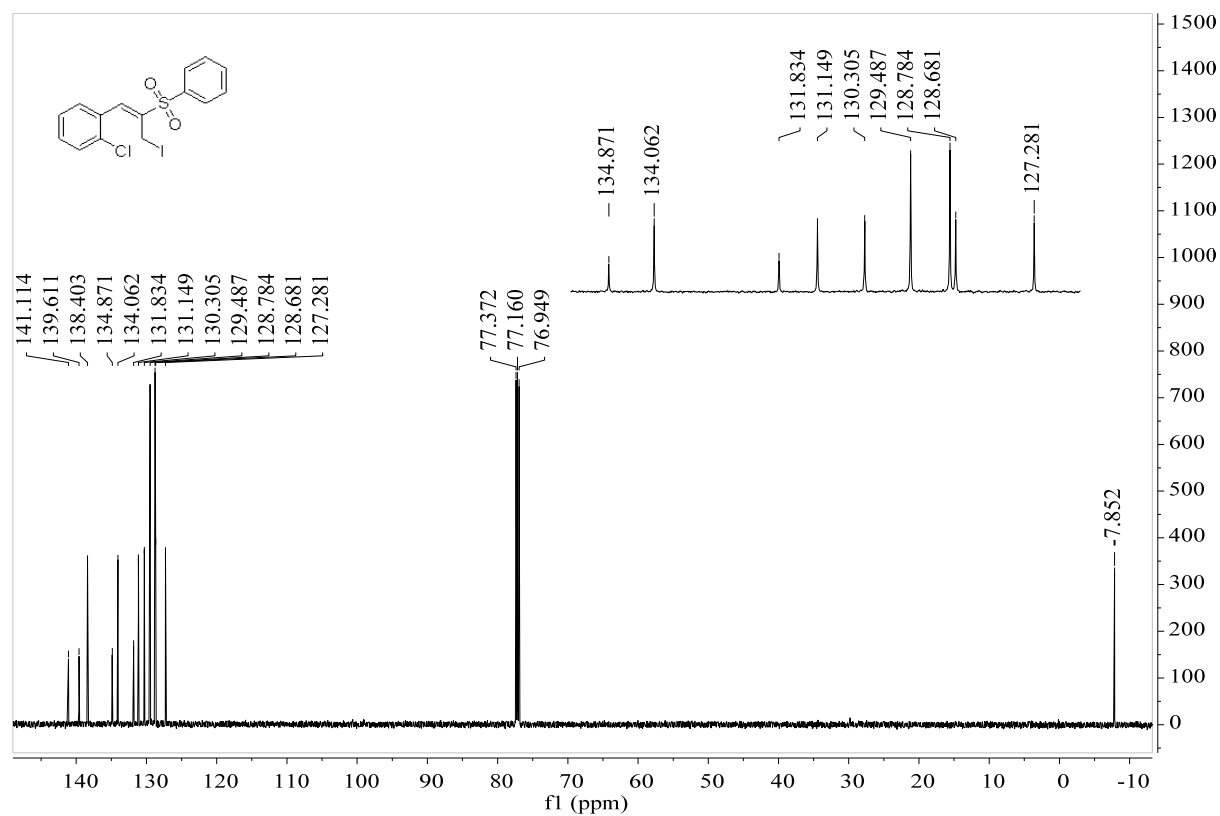

# Compound 3u

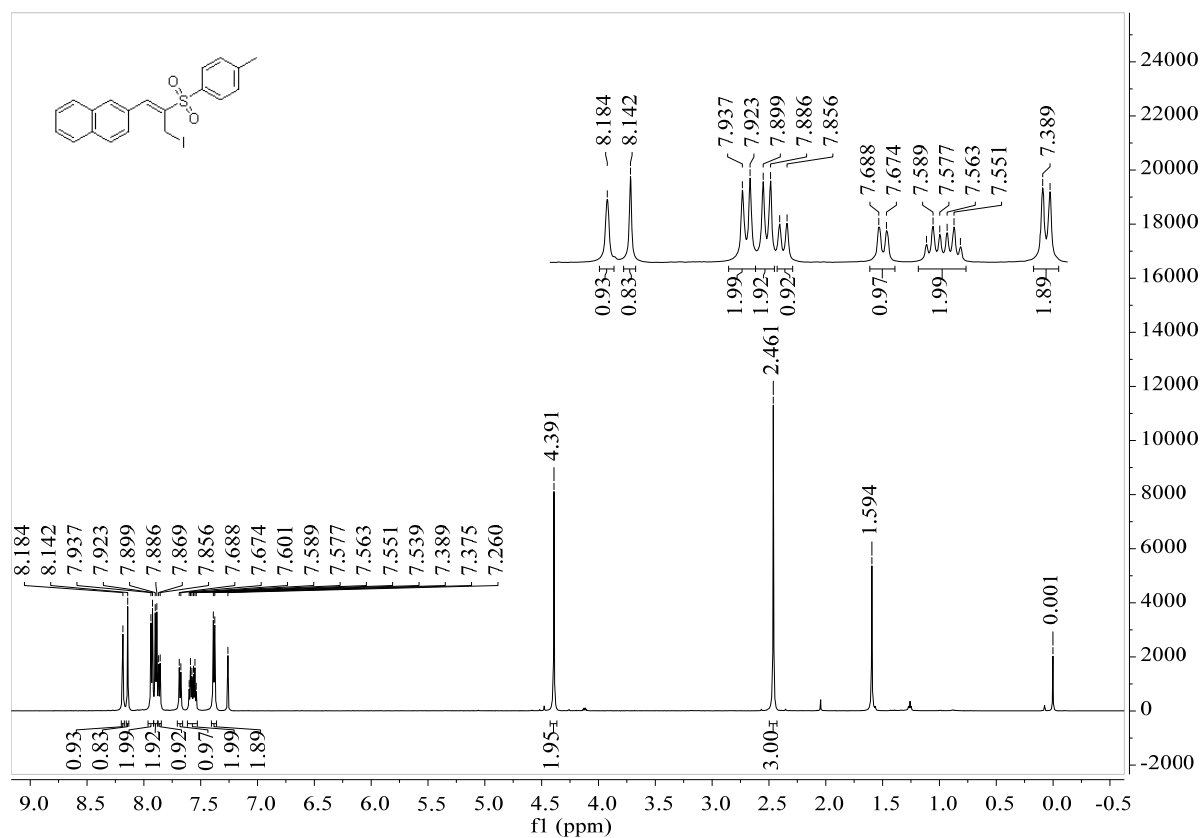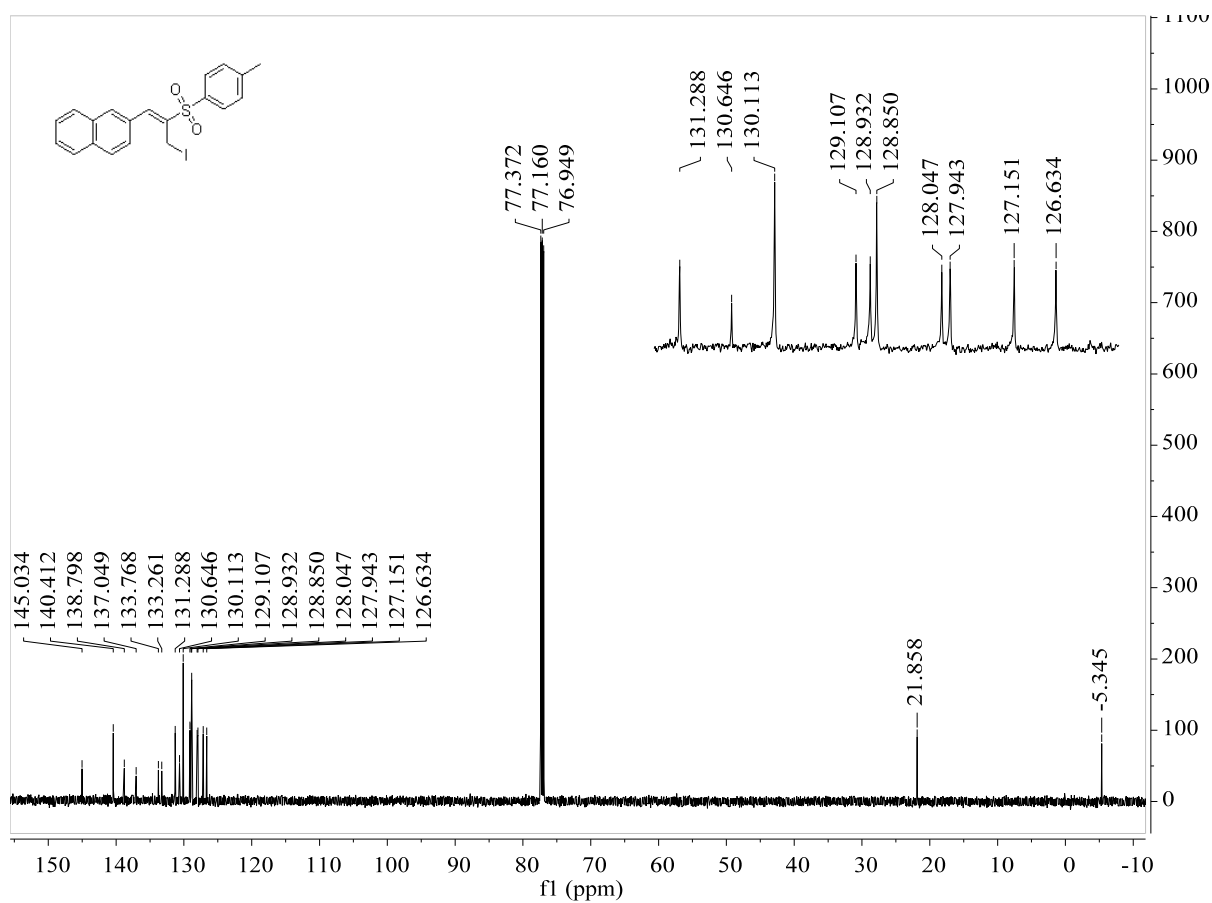

**Compound 3v**

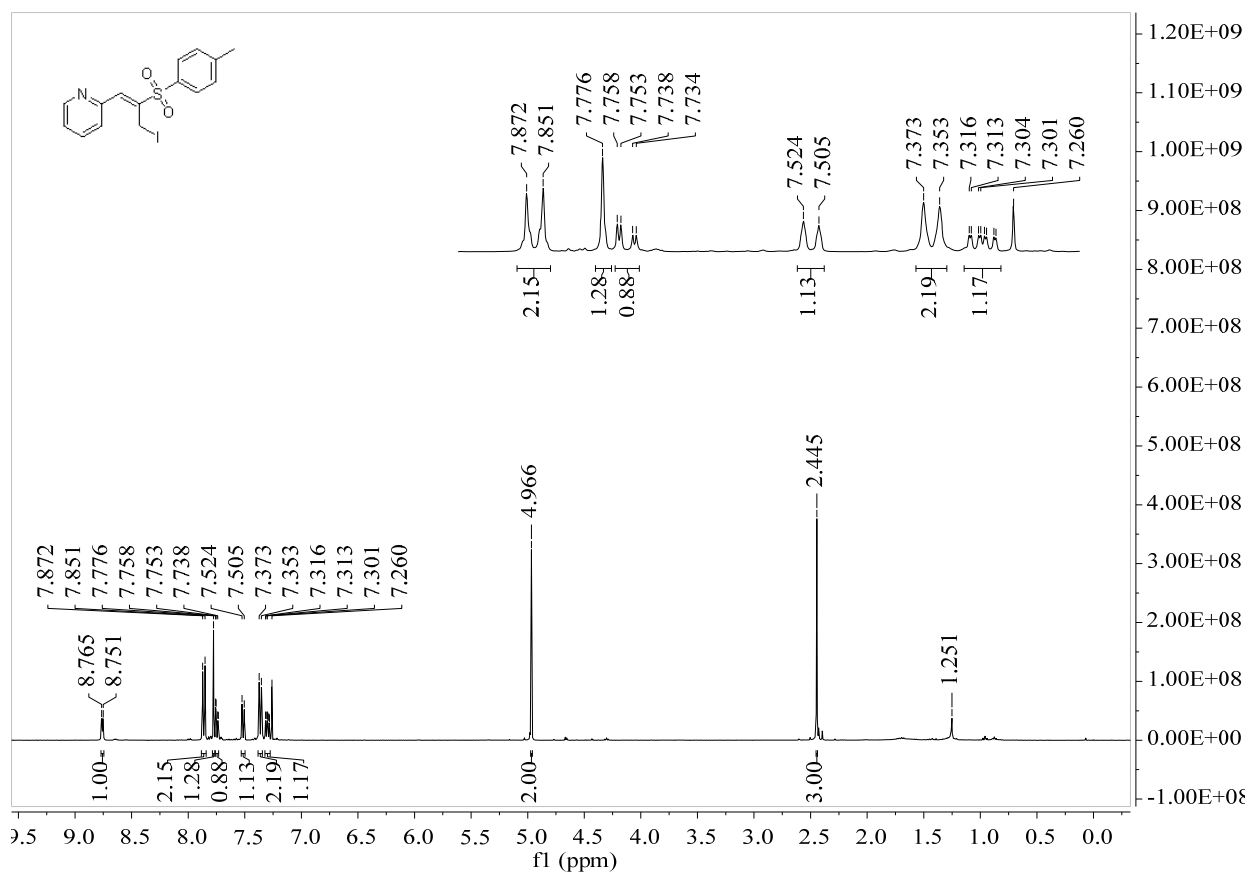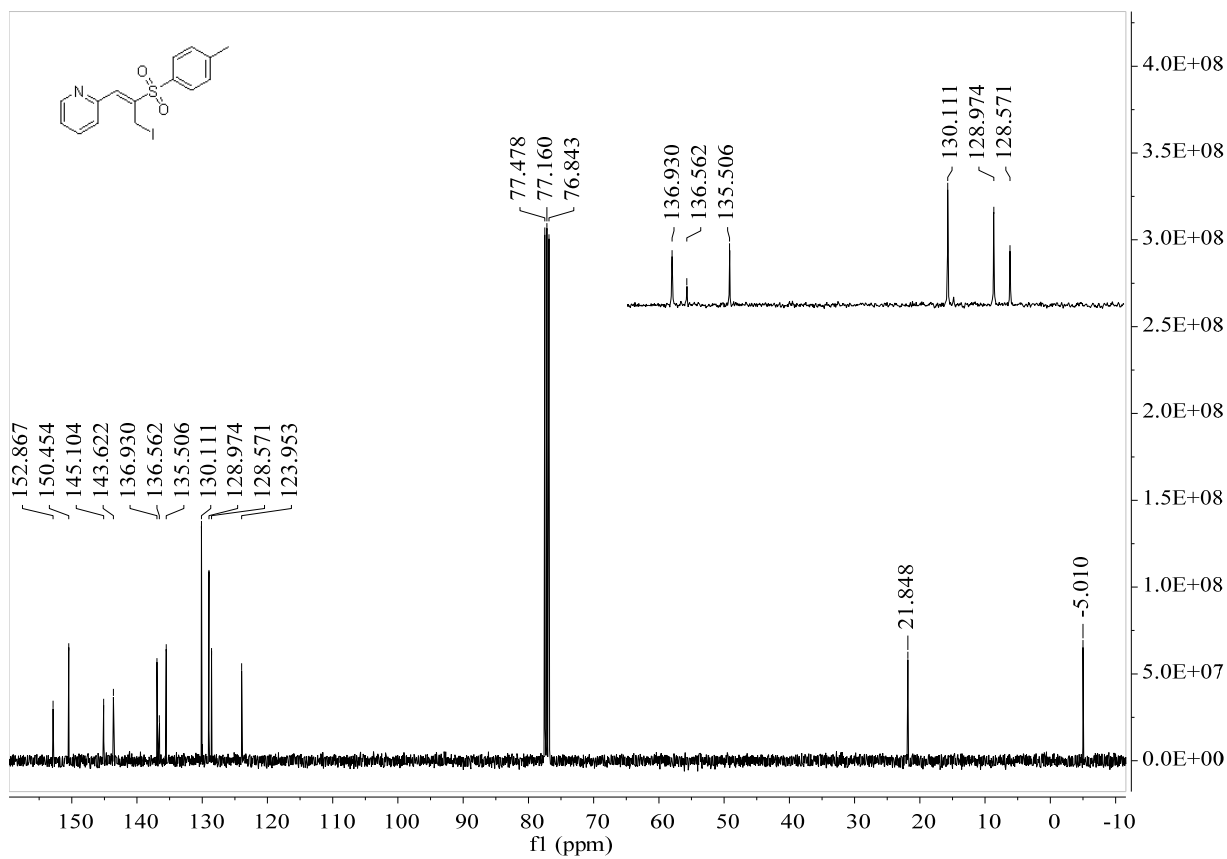

# Compound 3w

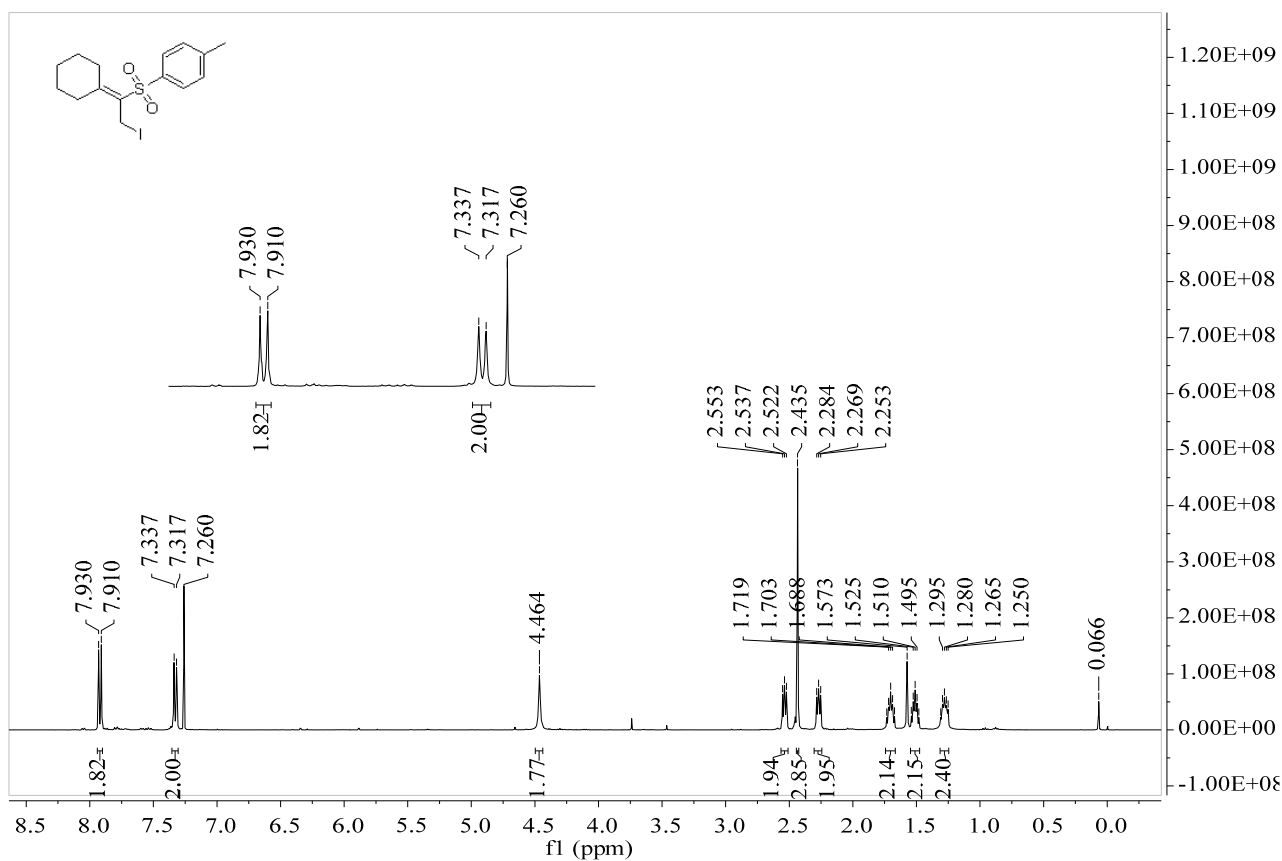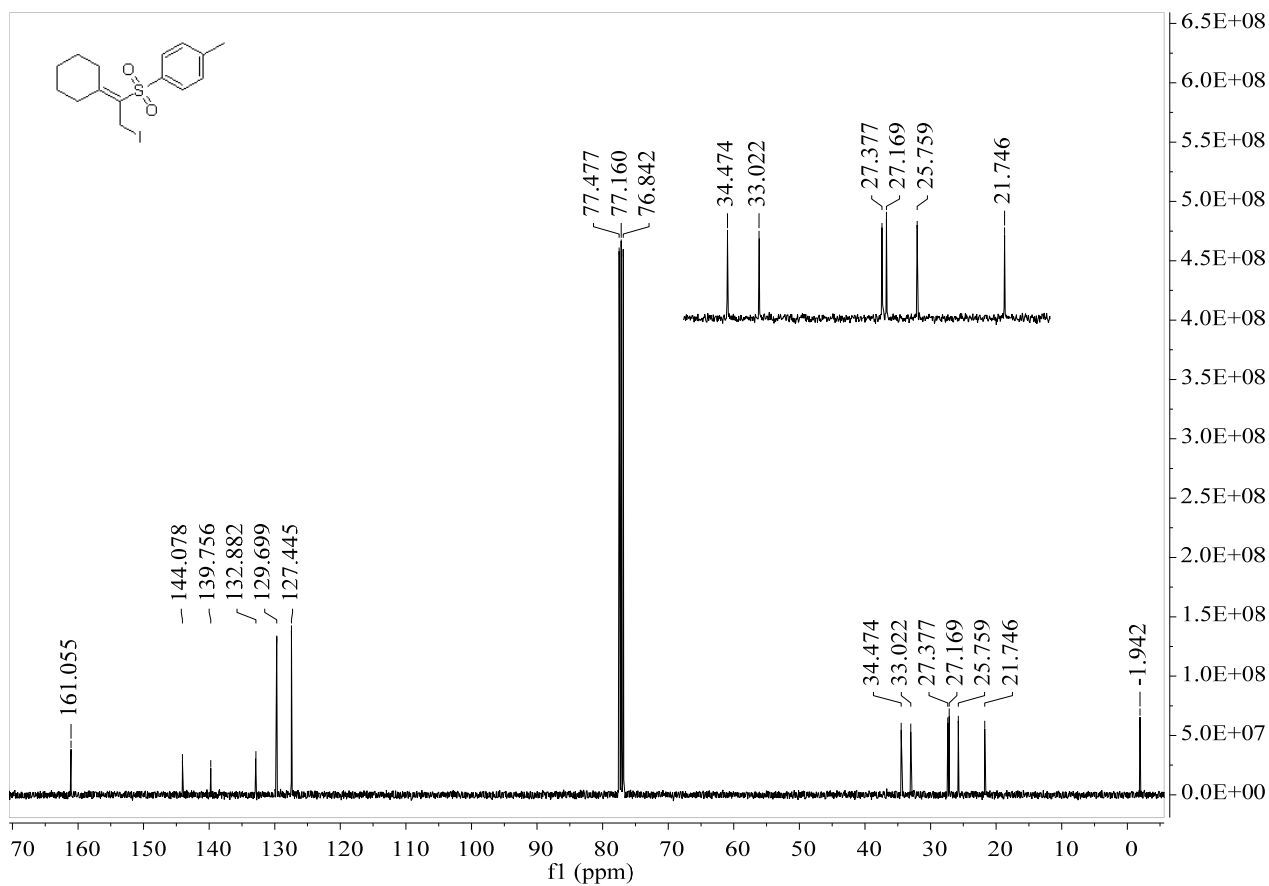

# Compound 3x

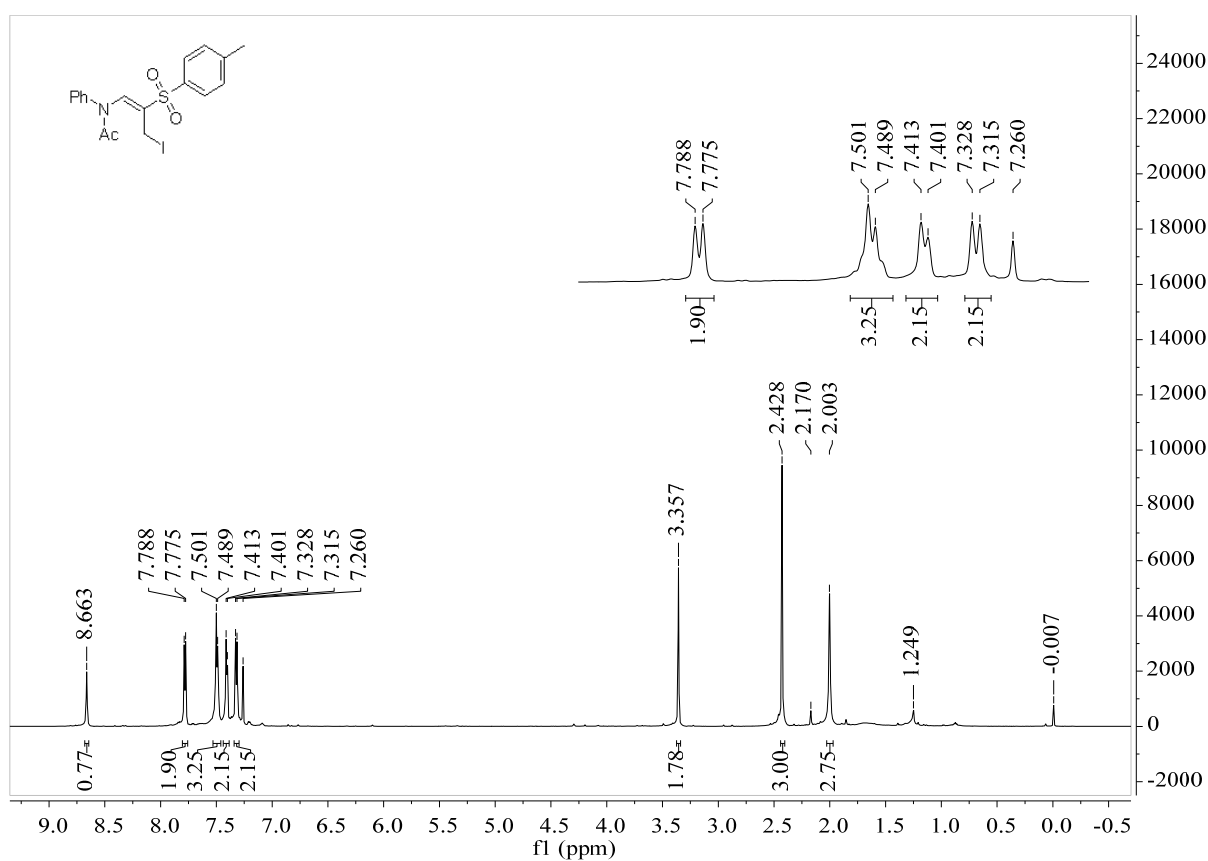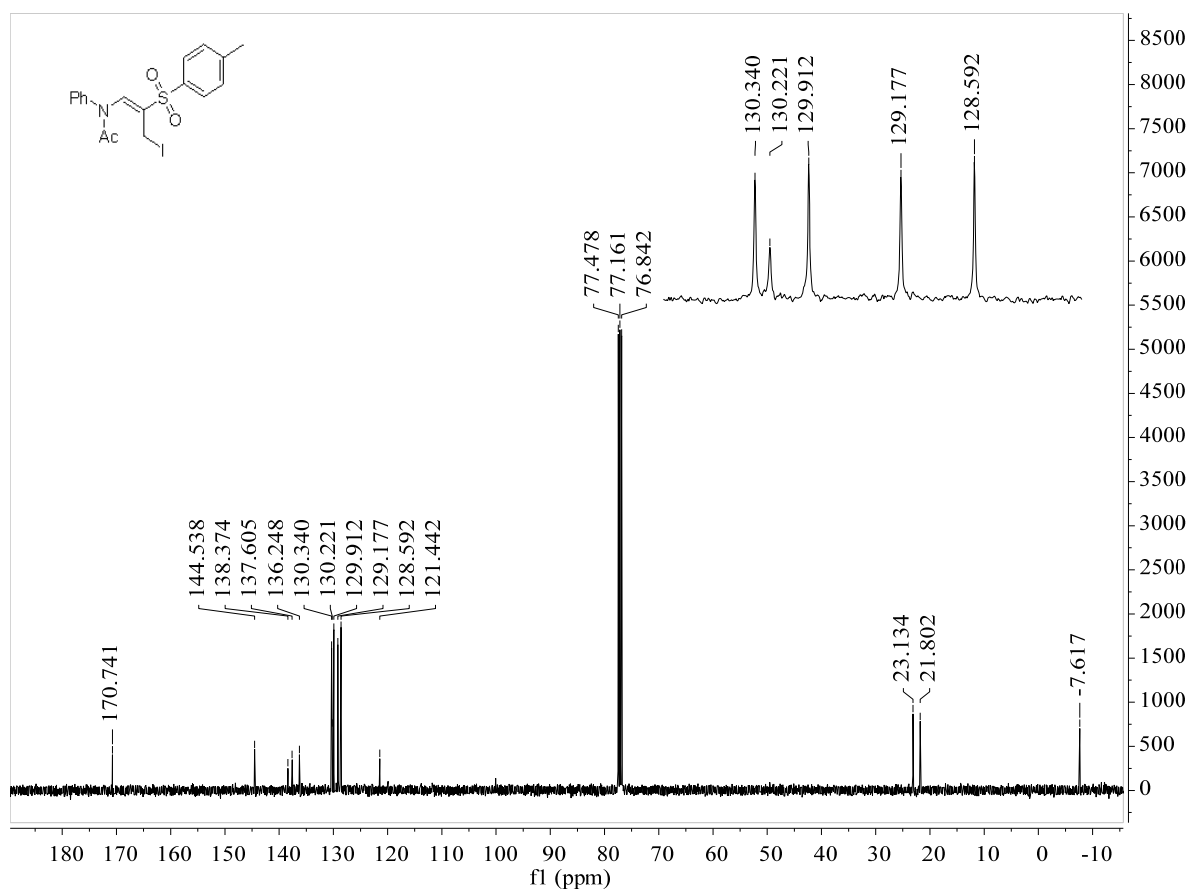

# Compound 3y

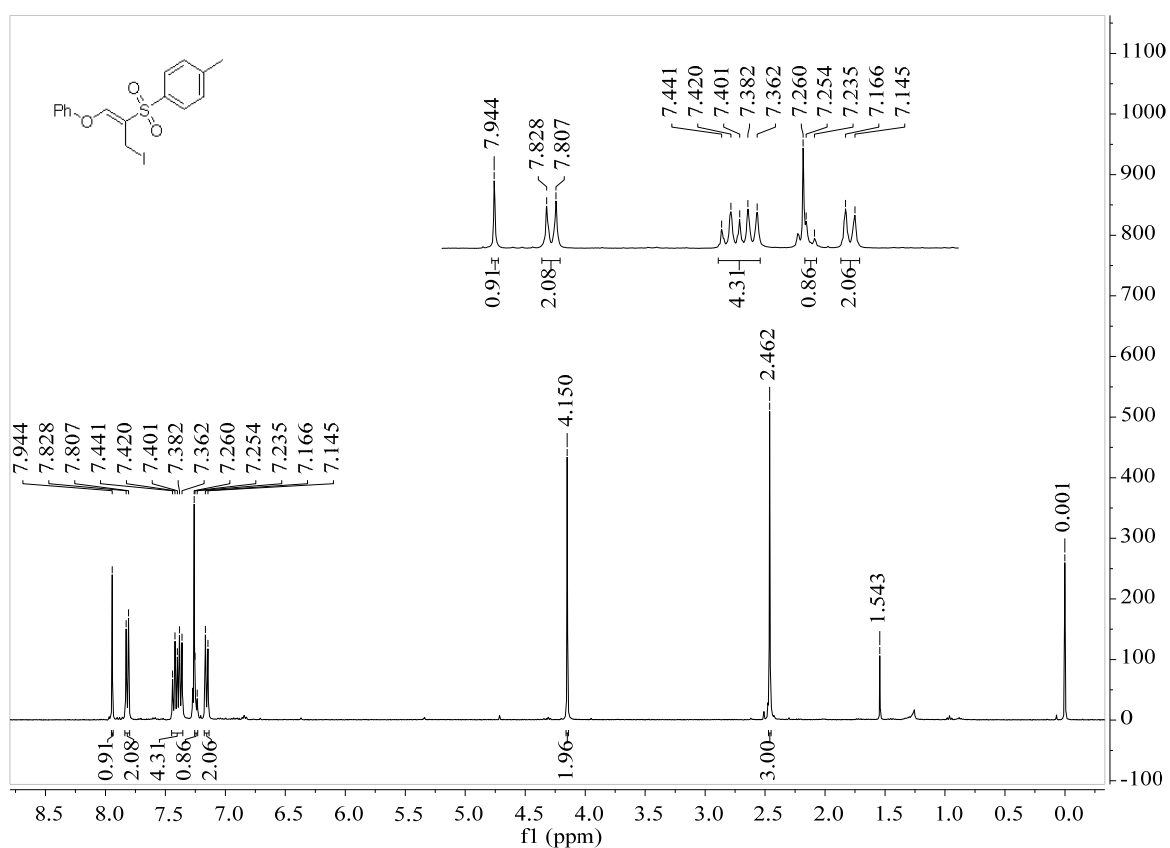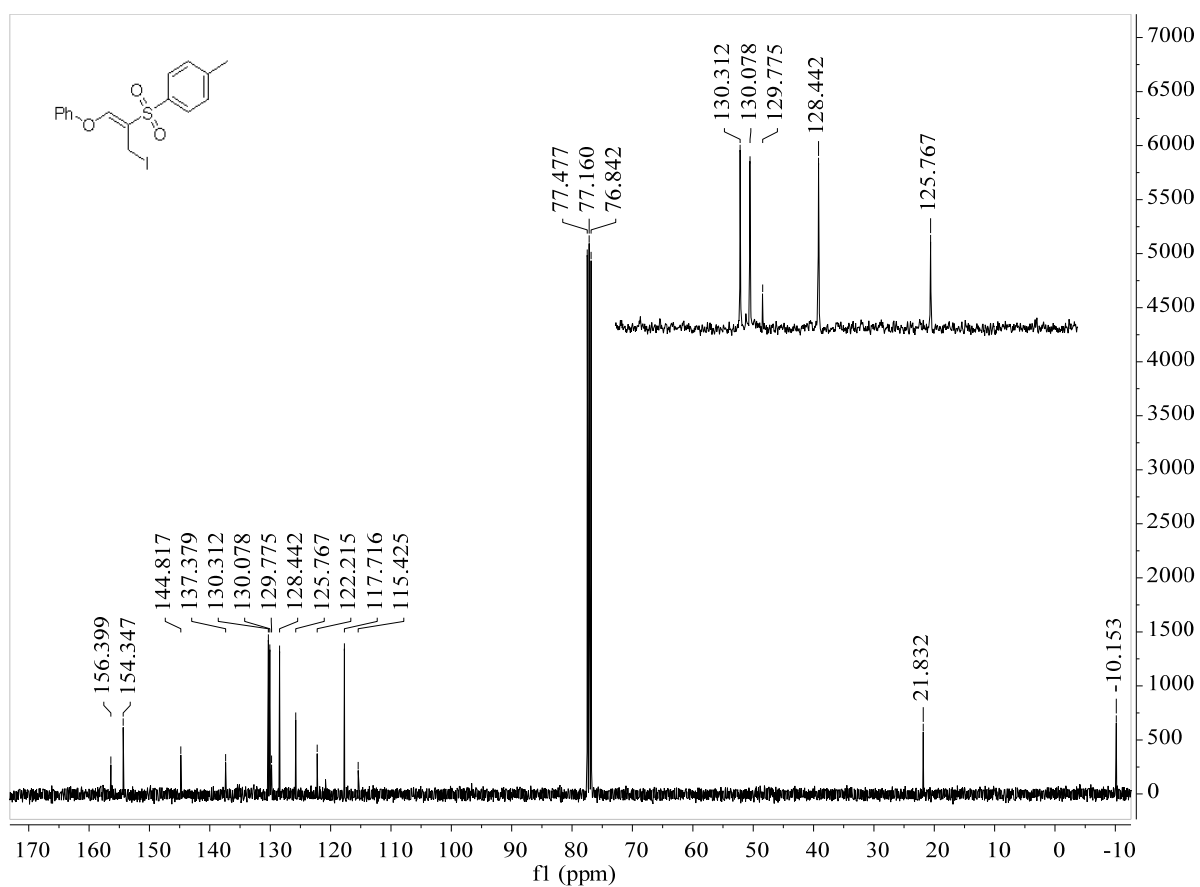



# Compound 3z

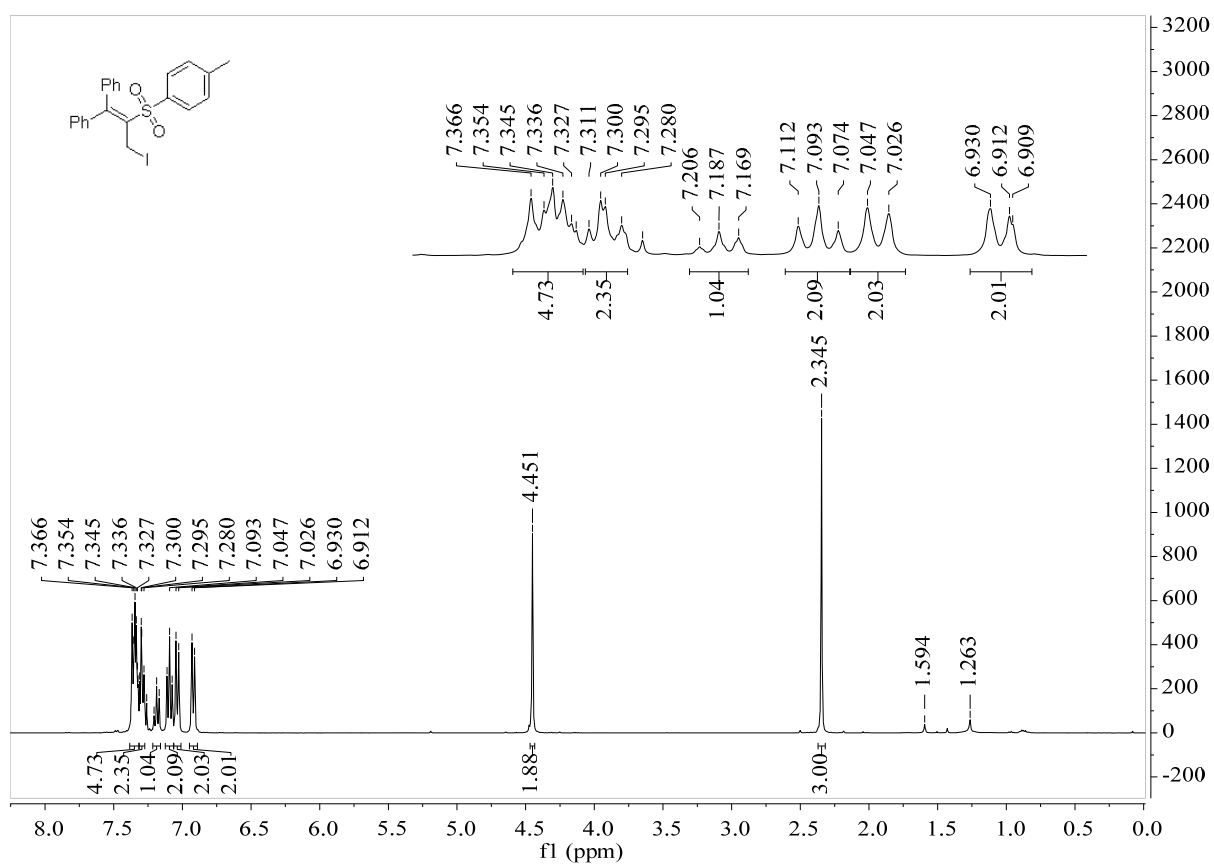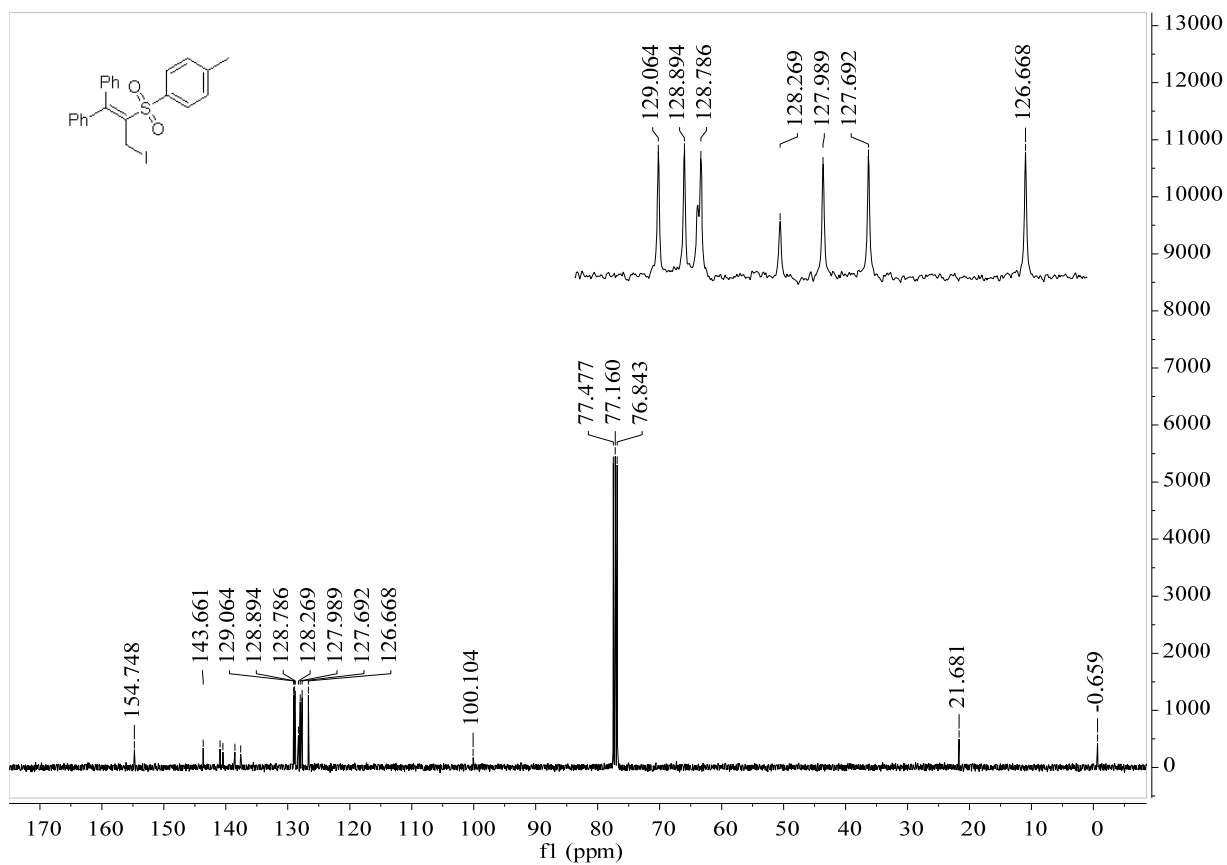

# Compound 3aa

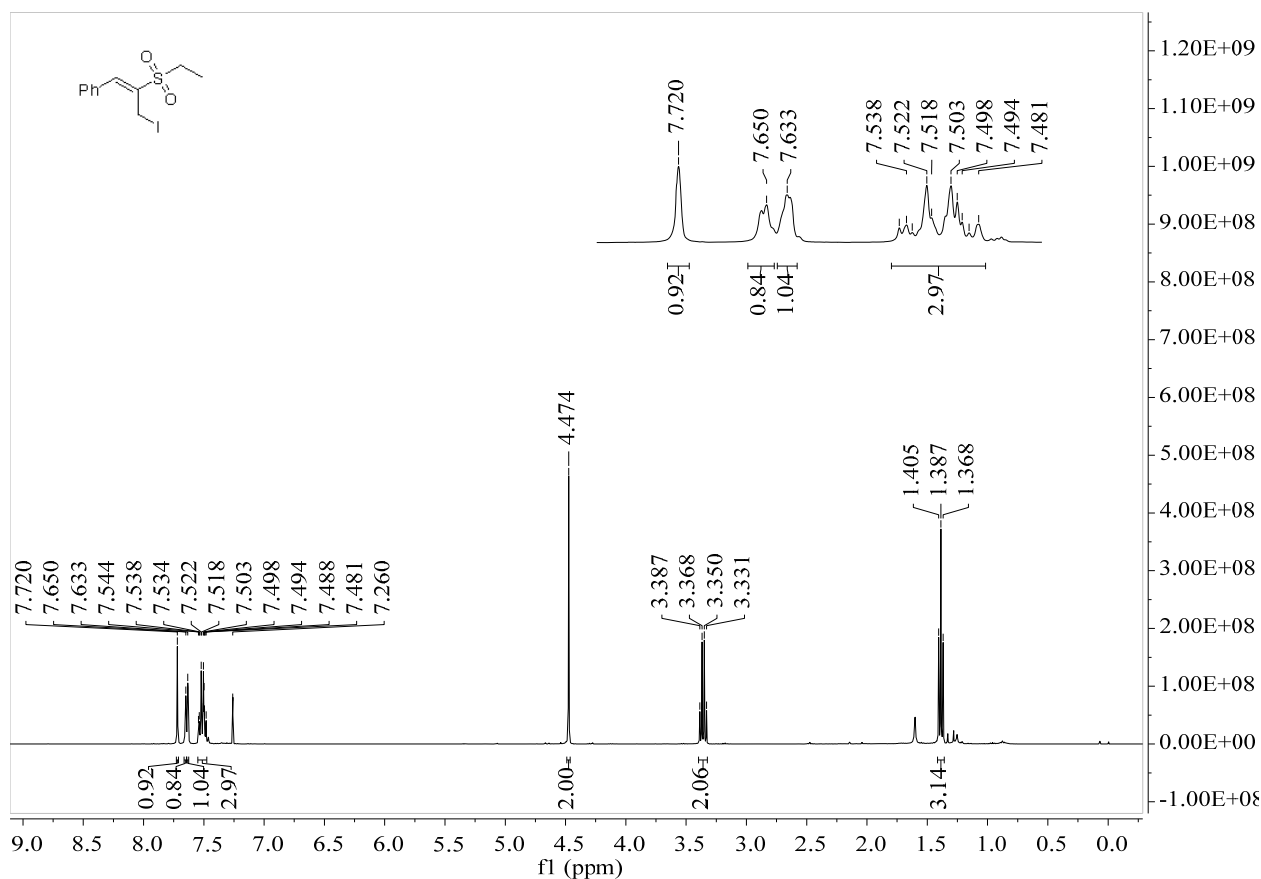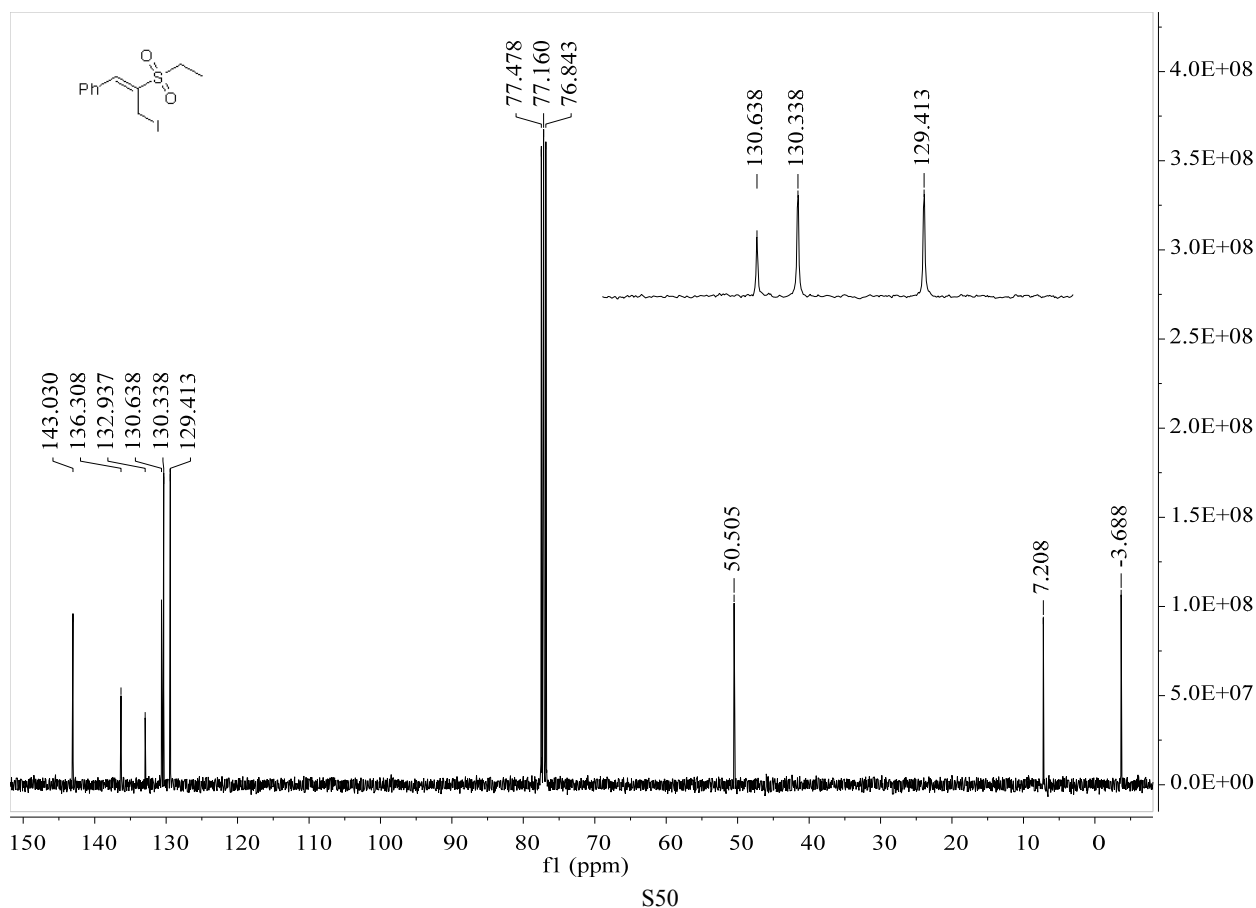

# Compound 3ab

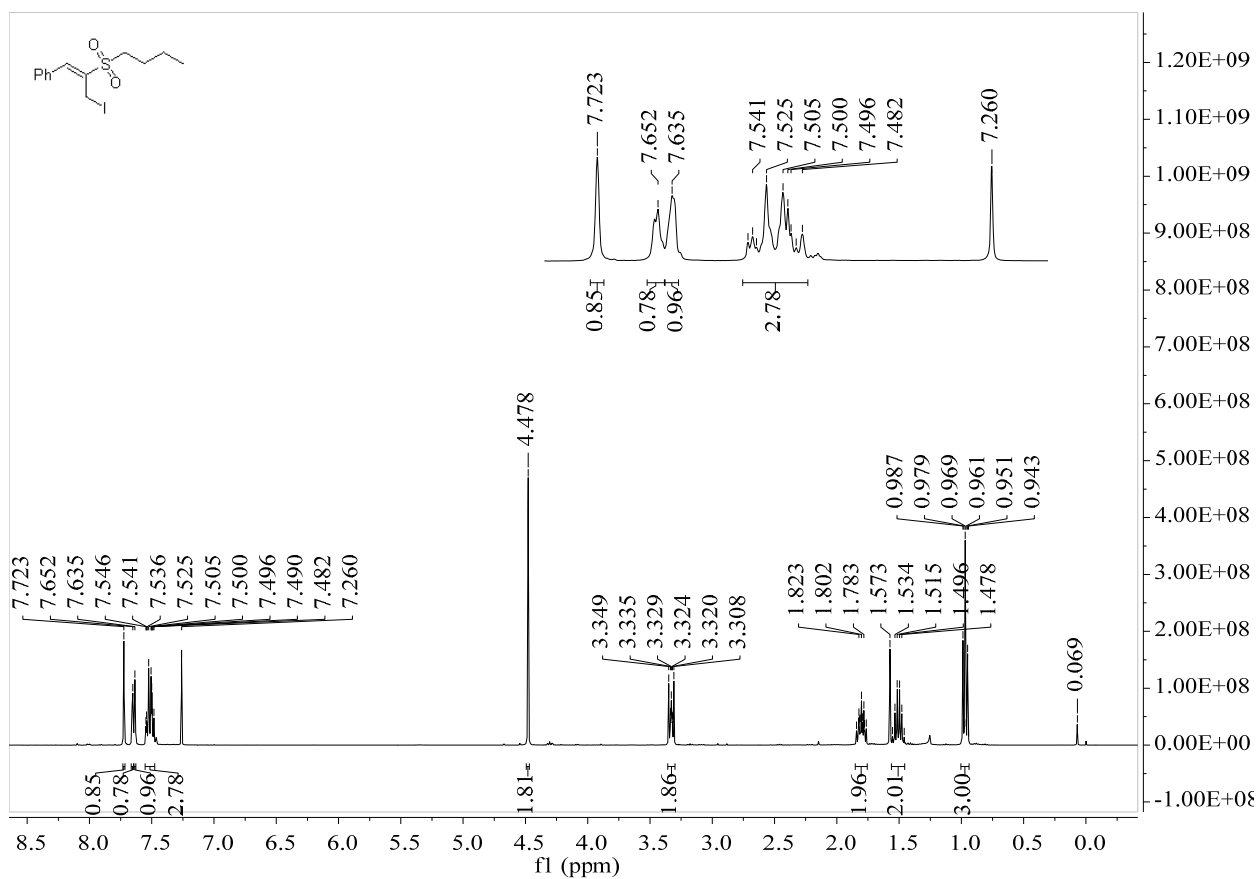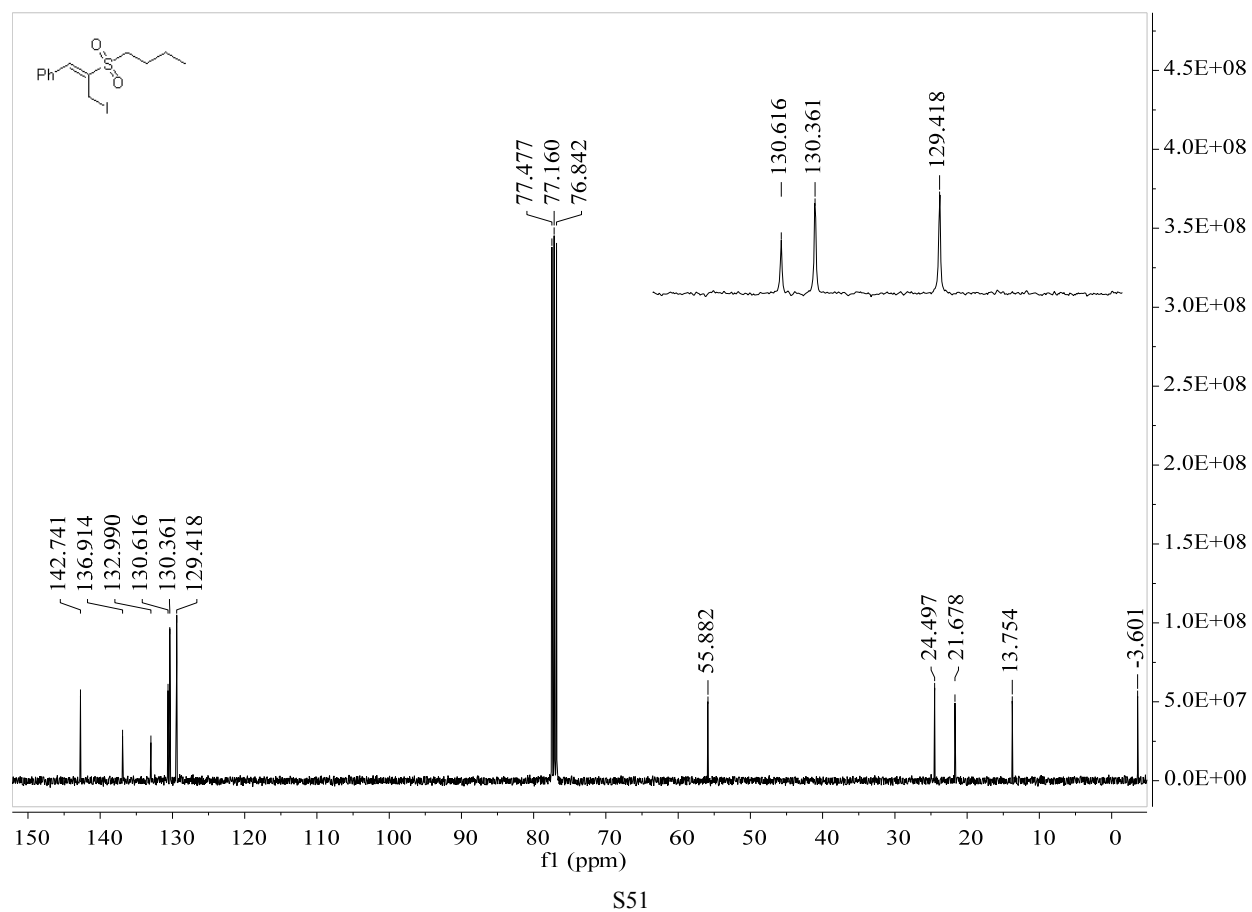

# Compound 3ac

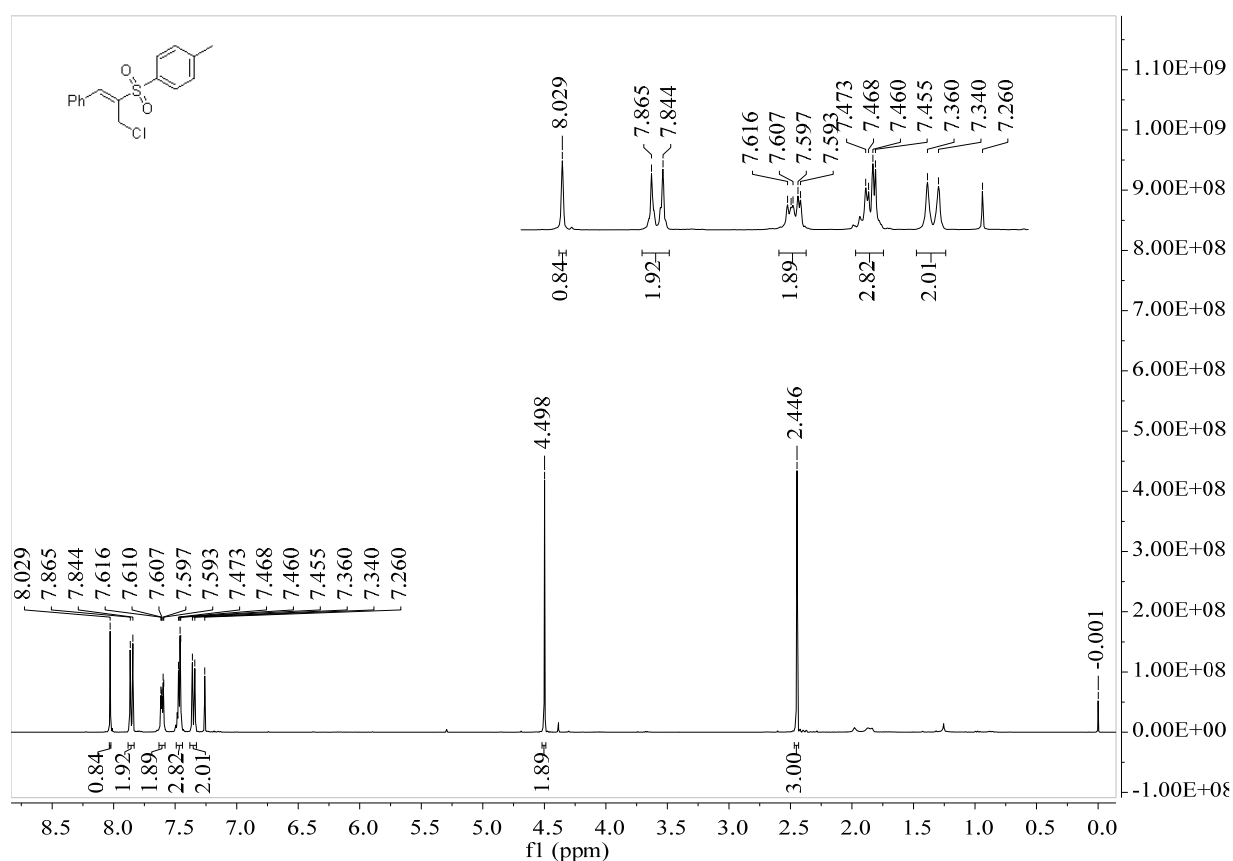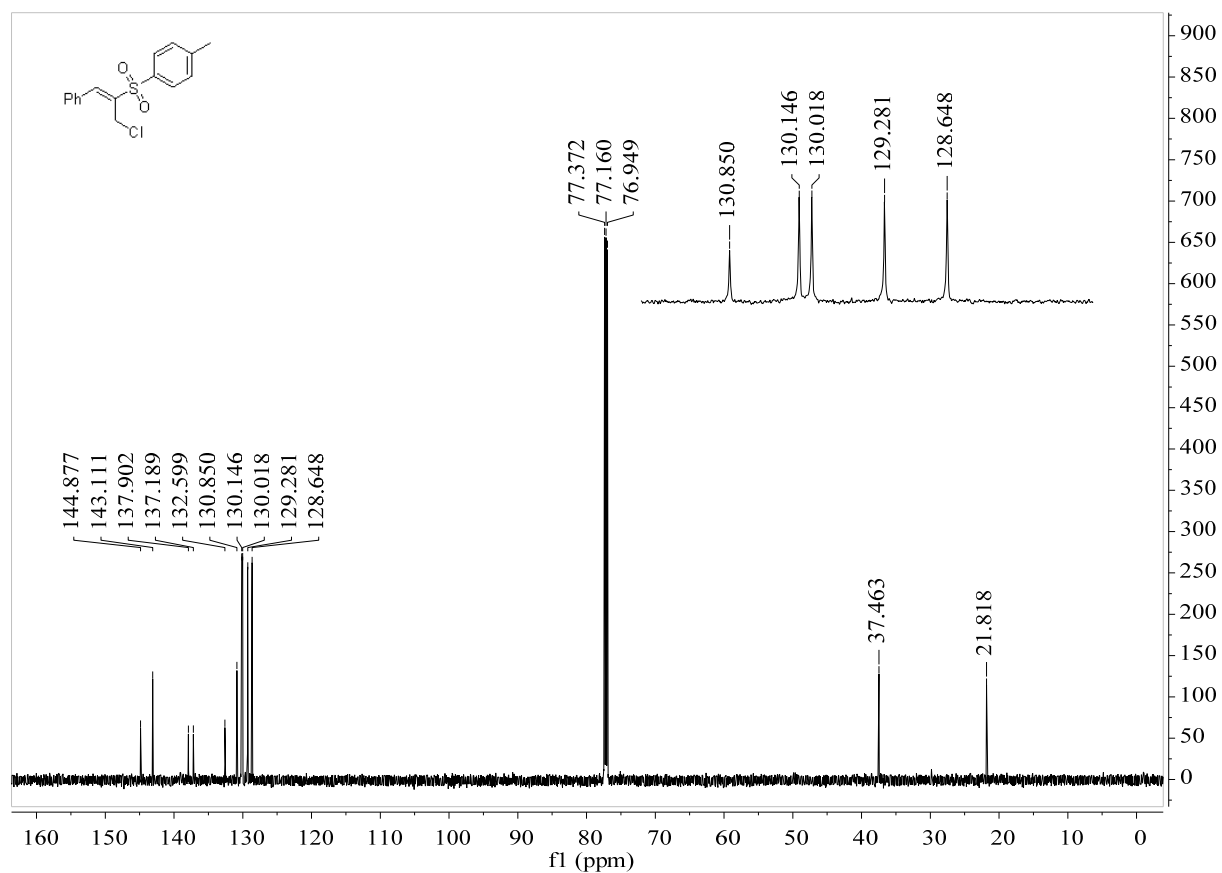

# Compound 3ad

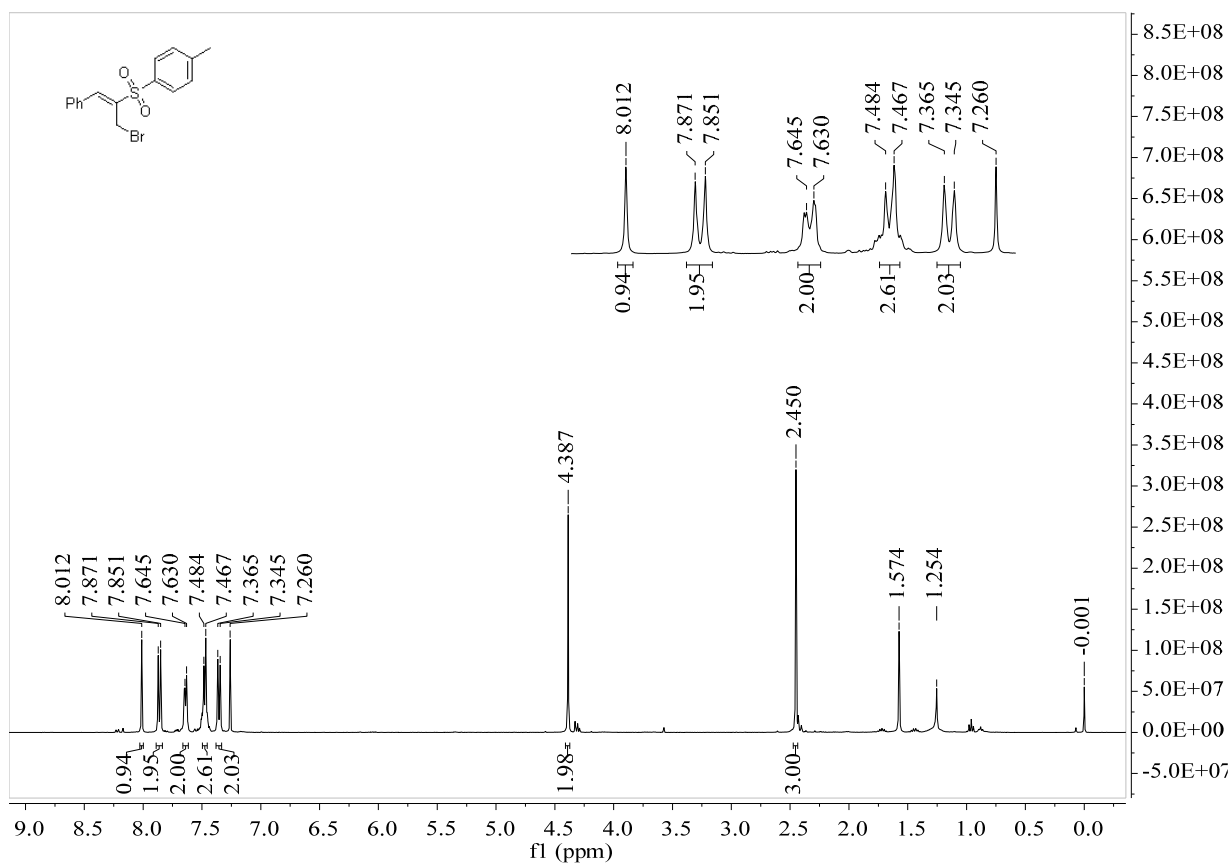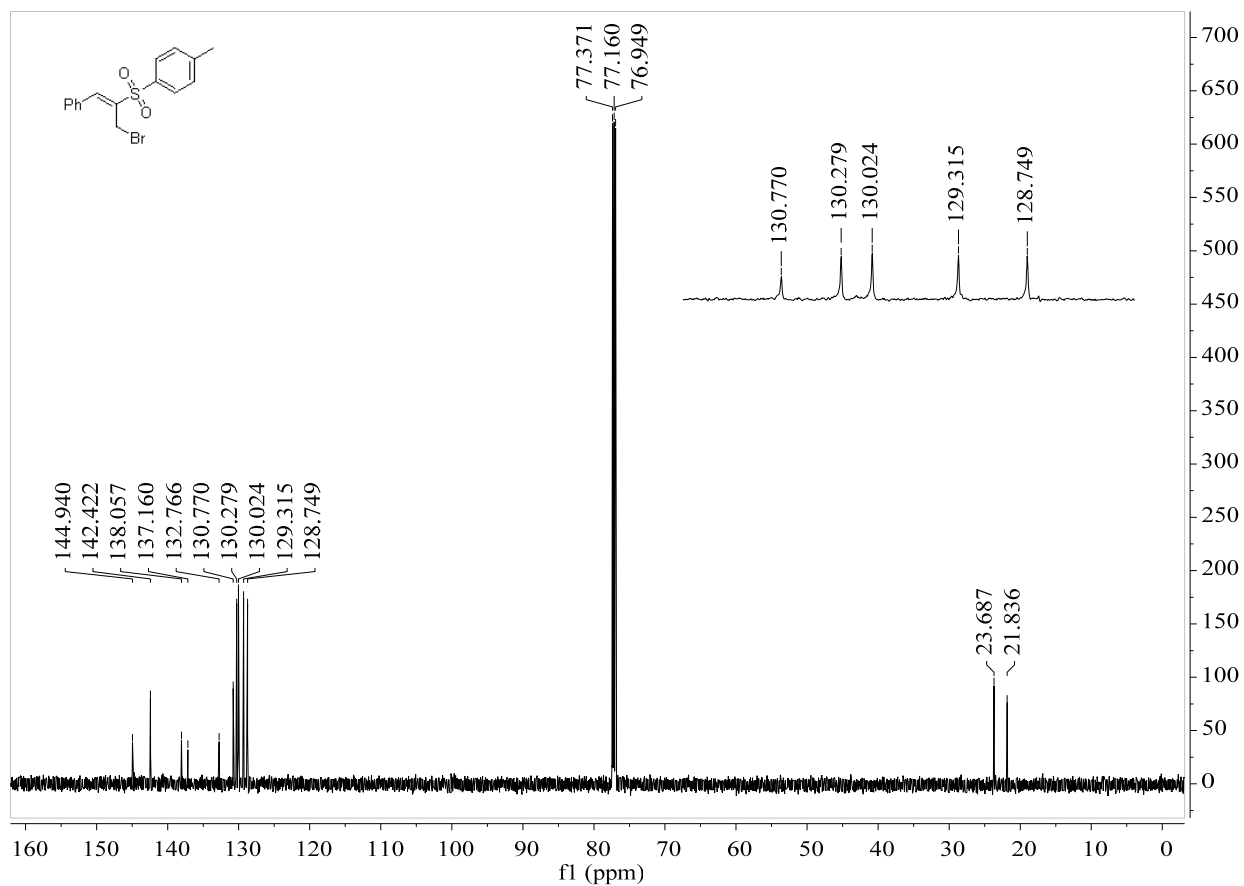

Supplement: Supplementary file 1 [file 12354752]
